# Supplementary material for: Effect of antenatal dietary myo-inositol supplementation on the incidence of gestational diabetes mellitus and fetal outcome: protocol for a double-blind randomised controlled trial
Source: PubMed Central journal article supplement — BMJ Open. 2022 Jan 4;12(1):e055314. doi: 10.1136/bmjopen-2021-055314 (PMC8728415; doi:10.1136/bmjopen-2021-055314), 2022-01-04
Supplement: bmjopen-2021-055314.draft_revisions.pdf [file bmjopen-2021-055314.draft_revisions.pdf]

# BMJ Open

BMJ Open is committed to open peer review. As part of this commitment we make the peer review history of every article we publish publicly available.

When an article is published we post the peer reviewers' comments and the authors' responses online. We also post the versions of the paper that were used during peer review. These are the versions that the peer review comments apply to.

The versions of the paper that follow are the versions that were submitted during the peer review process. They are not the versions of record or the final published versions. They should not be cited or distributed as the published version of this manuscript.

BMJ Open is an open access journal and the full, final, typeset and author-corrected version of record of the manuscript is available on our site with no access controls, subscription charges or pay-per-view fees (<http://bmjopen.bmj.com>).

If you have any questions on BMJ Open's open peer review process please email [info.bmjopen@bmj.com](mailto:info.bmjopen@bmj.com)

# BMJ Open

**A study protocol for a randomized controlled trial evaluating the effect of antenatal dietary Myo-inositol supplementation in women during pregnancy on the incidence of gestational diabetes mellitus and fetal outcome (MiGDM) trial**

|                               |                                                                                                                                                                                                                        |
|-------------------------------|------------------------------------------------------------------------------------------------------------------------------------------------------------------------------------------------------------------------|
| Journal:                      | <i>BMJ Open</i>                                                                                                                                                                                                        |
| Manuscript ID                 | bmjopen-2021-055314                                                                                                                                                                                                    |
| Article Type:                 | Protocol                                                                                                                                                                                                               |
| Date Submitted by the Author: | 11-Jul-2021                                                                                                                                                                                                            |
| Complete List of Authors:     | Ibrahim, Ibrahim; Sidra Medicine,<br>Abdullahi, Hala; Sidra Medicine<br>Fagier, Yassin; Sidra Medicine<br>Ortashi, Osman; Sidra Medicine<br>Terrangera, Annalisa; Sidra Medicine<br>Okunoye, Gbemisola; Sidra Medicine |
| Keywords:                     | Diabetes in pregnancy < DIABETES & ENDOCRINOLOGY, Maternal medicine < OBSTETRICS, NUTRITION & DIETETICS                                                                                                                |
|                               |                                                                                                                                                                                                                        |

SCHOLARONE™  
Manuscripts

**Title Page****Title of Study:**

A study protocol for a randomized controlled trial evaluating the effect of antenatal dietary Myo-inositol supplementation in women during pregnancy on the incidence of gestational diabetes mellitus and fetal outcome (MiGDM) trial

**Authors:**

1. Ibrahim Ibrahim<sup>1,2</sup>
2. Hala Abdullahi<sup>2,3</sup>
3. Yassin Fagier<sup>2,3</sup>
4. Osman Ortashi<sup>2,3</sup>
5. Annalisa Terrangera<sup>4</sup>
6. Gbemisola Okunoye<sup>2,3,5</sup>

**Authors email:**

1. [ibrahim2002@doctors.org.uk](mailto:ibrahim2002@doctors.org.uk)
2. [habdullahi@sidra.org](mailto:habdullahi@sidra.org)
3. [yfagier@sidra.org](mailto:yfagier@sidra.org)
4. [oortashi@sidra.org](mailto:oortashi@sidra.org)
5. [aterrangera@sidra.org](mailto:aterrangera@sidra.org)
6. [gokunoye@sidra.org](mailto:gokunoye@sidra.org)

**Authors Affiliation:**

1. Senior Attending Physician, Endocrinology, Sidra Medicine, Doha, Qatar
2. Assistant Professor , Weill Cornell Medicine-Qatar
3. Senior Attending Physician, Obstetrics and Gynecology, Sidra Medicine
4. Head of Laboratory of Nutritional Genomics and Metabolism ,Sidra Medicine, Qatar
5. Division Chief of Obstetrics(Acting) Sidra Medicine

**Corresponding Author:**

Ibrahim Ibrahim

Sidra Medicine, Education city, Doha, Qatar

E mail: [ibrahim2002@doctors.org.uk](mailto:ibrahim2002@doctors.org.uk)

## ABSTRACT

**Introduction:** Gestational Diabetes Mellitus (GDM) affects 23.6% of Qatari women and is associated with both maternal and perinatal morbidity as well as long term risk of the developing type 2 diabetes (T2DM). Multi modal evidence-based measures and interventions have been introduced in a bid to improve outcome of pregnancy in women with GDM. A number of challenges exist with current interventions including; non-compliance with dietary advice, reluctance of mothers to ingest Metformin tablets or use Insulin injections. These challenges highlight the importance of pursuing evidence-based prevention strategies. Myo-inositol is readily available as an FDA approved food supplement with emerging but limited evidence suggesting it may be beneficial in reducing the incidence of GDM. Further studies, such as this one, from different ethnic contexts and with differing risk factors, are urgently needed to assess Myo-inositol effects on maternal and neonatal outcomes.

**Methods and analysis:** This study is a prospective, randomized, double-blinded, placebo controlled clinical trial, to either Myo-inositol supplementation or placebo.

We plan to enrol 640 pregnant women attending antenatal care at Sidra Medicine, 320 in each arm. This is sufficient to detect a clinically significant reduction of 40% in the incidence of GDM between groups using a two-tailed z-test of proportions between the two groups with 80% power and a 95% level of confidence, accounting for 20% drop out rate. This 40% reduction represents a 23.6 % incidence of newly detected diabetes in pregnancy in the placebo group and maximum of 14.2% in the Myo-insitol group.

1  
2  
3 Based on the trial findings, we aim to develop a predictive model of response to Myo-  
4 inositol supplementation in pregnancy that incorporates a composite of demographic,  
5  
6 inositol supplementation in pregnancy that incorporates a composite of demographic,  
7  
8 biophysical and biochemical (HOMA-IR) indices.  
9

10  
11 **Ethics and dissemination:** Ethical approval for the study was obtained from Sidra Medicine  
12  
13 IRB. Results of the main trial outcome and secondary endpoints will be submitted for  
14  
15 publication in a peer-reviewed journal.  
16  
17

18  
19 **Trial Registration:** Registration number ISRCTN16448440 (ISRCTN registry).  
20  
21

## 22 **Article Summary:**

### 23 **Strengths and limitations of this study**

- 24  
25  
26  
27  
28 • This clinical trial is looking at the effect of Myo-inositol supplementation in women  
29 during pregnancy on the incidence of GDM; If hypothesis is proven true, these findings  
30 could change the way women with GDM are cared for.  
31  
32
- 33  
34  
35  
36 • This is a well-designed prospective double-blinded randomized controlled trial with a  
37 high degree of reliability to test the effectiveness and safety of Myo-inositol supplement.  
38  
39
- 40  
41  
42 • There is limited data available on GDM interventions, mainly in Caucasian women in  
43 open label design studies; however this study will be the first RCT trial proposed in this  
44 ethnic population with high risk of GDM.  
45  
46
- 47  
48  
49 • The relative mobility of expatriate population in Qatar is a potential limitation of the  
50 study with regards to medium to long term follow up.  
51  
52
- 53  
54  
55 • The duration of Myo-inositol supplementation prior to OGTT is variable, between 12  
56 and 20 weeks and this is a potential limitation of the study.  
57  
58  
59  
60

**Keywords:**

Gestational Diabetes

Pregnancy

Myo-inositol

Perinatal morbidity

Dietary supplementation

**INTRODUCTION**

Gestational diabetes mellitus (GDM) is defined as any degree of glucose intolerance with onset or first recognition during pregnancy (1). Identified risk factors for GDM include maternal age, maternal body mass index (BMI), ethnic background, family history and previous history of GDM (1). Globally, the International Diabetes Federation (IDF) estimates that 14% of all the deliveries are affected by GDM(2). Diabetes is a major public health issue in Qatar with increasing prevalence over the years. A recent study from Qatar showed that the prevalence of GDM among the Qatari women was 23.6% (3). GDM is a major pregnancy complication associated with both maternal and perinatal morbidity as well as long term risk of the development of type 2 diabetes (T2DM). The Hyperglycemia and Adverse Pregnancy Outcomes (HAPO) study, a multi-centric, observational study, evaluated the relationship between maternal hyperglycemia and adverse pregnancy outcomes, and identified elevated maternal serum glucose level during pregnancy as a major risk factor for adverse pregnancy outcomes, increasing rates of large-for-gestational-age infants, fetal hyperinsulinemia, neonatal hypoglycemia, and caesarean delivery (4). During pregnancy, GDM is associated with increased risk of pre-eclampsia, pre-term labor, Caesarean-section, macrosomia,

1  
2  
3 shoulder dystocia, as well as a substantial increase in medical cost(5),(6).A study in  
4  
5 Denmark showed that, by the age of 18-27 years, 21% of the offspring who were exposed to  
6  
7 GDM during pregnancy have developed T2DM, which was eight-fold higher than the  
8  
9 background population(7). It had also been shown that exposure to hyperglycemia in  
10  
11 pregnancy is independently associated with the offspring's risk of abnormal glucose  
12  
13 tolerance, obesity, and higher blood pressure at 7 years of age(8).In the last decade, multi  
14  
15 modal evidence-based measures and interventions have been introduced in a bid to  
16  
17 improve outcome of pregnancy in women with GDM. It has also been shown that both life  
18  
19 style modifications and Metformin therapy are effective in delaying or preventing diabetes  
20  
21 in women with a history of GDM (9). Whilst significant progress has been made, a number  
22  
23 of challenges remain with current interventions including; non-compliance with dietary  
24  
25 advice, reluctance of mothers to ingest Metformin tablets or use Insulin injections. These  
26  
27 challenges highlight the importance of pursuing evidence-based prevention strategies.  
28  
29 Inositol has been proposed as a food supplement that might reduce gestational diabetes  
30  
31 incidence in high-risk pregnant women. Myo-inositol, an isomer of inositol, is a naturally  
32  
33 occurring sugar commonly found in cereals, corn, legumes and meat. It is classed as a  
34  
35 dietary supplement by the US Food and Drug Administration. It is one of the intracellular  
36  
37 mediators of the insulin signaling pathway and correlated with insulin sensitivity in T2DM. It  
38  
39 is an insulin-sensitizing mediator which is reported to reduce plasma glucose levels in  
40  
41 polycystic ovary syndrome where it has gained increasing attention and used for its unique  
42  
43 property of reducing insulin resistance. Inositol (in the MI or DCI isoforms) was reported to  
44  
45 improve insulin sensitivity and ovulatory function in young women affected by polycystic  
46  
47 ovary syndrome (10).Chiro- and Myo-inositols are major components of the two inositol  
48  
49 phosphoglycan mediators of insulin action. It was found that, patients with Type 2 diabetes  
50  
51  
52  
53  
54  
55  
56  
57  
58  
59  
60

1  
2  
3 compared to controls have less active chiro-inositol-containing mediator fractions form  
4  
5 and a significantly reduced chiro-inositol to Myo-inositol ratio (11). In a prospective RCT  
6  
7 including pregnant women with a parent with type 2 diabetes who were treated from the  
8  
9 end of the first trimester with 2 g Myo-inositol plus 200 mcg folic acid twice a day (n = 110)  
10  
11 and in the placebo group (n = 110), who were only treated with 200 mcg folic acid twice a  
12  
13 day; Myo-Inositol supplementation reduced the incidence of GDM (6 %vs. 15.3%, P = 0.04)  
14  
15 as well as the incidence of the delivery of a macrocosmic fetus (12).The potential beneficial  
16  
17 effect on improving insulin sensitivity suggests that it may be useful for preventing GDM.  
18  
19 Although Myo-inositol shows promise in preventing GDM, there is not enough evidence at  
20  
21 this stage to support its routine use. A Cochrane Database Systematic Review in 2015 looked  
22  
23 at the antenatal dietary supplementation with Myo-inositol in women during pregnancy for  
24  
25 preventing gestational diabetes concluded that there is evidence from four trials of a  
26  
27 potential benefit for reducing the incidence of gestational diabetes, although there was no  
28  
29 consensus on neonatal outcomes. The authors recommended further studies to include  
30  
31 pregnant women of different ethnicities and varying risk factors.(13). In a recent systematic  
32  
33 review and meta-analysis including 5 RCTs, Myo-inositol supplementation is associated with  
34  
35 significantly reduced incidence of gestational diabetes (risk ratio (RR) = 0.43; 95%CI = 0.21-  
36  
37 0.89; p = .02), and preterm delivery (RR = 0.36; 95%CI = 0.17-0.73; p = .005), but has no  
38  
39 substantial impact on 2-h glucose oral glucose tolerance test (OGTT) (mean difference  
40  
41 (MD) = -6.90; 95%CI = -15.07 to 1.27; p = .10), gestational age at birth (MD = 0.74; 95%CI = -  
42  
43 1.06 to 2.54; p = .42), birth weight (MD = -5.50; 95%CI = -116.99 to 105.99; p = .92), and  
44  
45 macrosomia (RR = 0.65; 95%CI = 0.20-2.11; p = .47) (14). Another recent systematic review  
46  
47 also supported these findings in addition to a lower incidence of 2h OGTT values (15).  
48  
49  
50  
51  
52  
53  
54  
55  
56  
57  
58  
59  
60



1  
2  
3 In view of the ready availability of Myo-inositol as a dietary supplement and its relatively  
4 low cost compared to traditional interventions for preventing GDM, exploring its potential  
5 role in reduction of GDM is a much needed and timely study in a different socio-economic  
6 and population context, such as Qatar. In addition, such a study will contribute to the  
7 generalizable knowledge and direction of future research on GDM including comparison  
8 with other interventions (e.g. life style and Metformin).  
9  
10  
11  
12  
13  
14  
15  
16

## 17 **Methods/Design**

### 18 **Aim and Hypothesis**

19  
20  
21 This is a prospective, randomized, double-blind, placebo controlled clinical trial, to either  
22 Myo-inositol supplementation or placebo. The study plans to enroll 640 pregnant women  
23 attending antenatal care at Sidra Medicine with 320 pregnant women in each arm, the study  
24 overview is summarized in diagram A. The hypothesis for the study is that Myo-inositol in  
25 pregnancy reduces the risk of developing Gestational Diabetes.  
26  
27  
28  
29  
30  
31  
32  
33  
34  
35  
36

### 37 **Outcome Measures**

38  
39  
40 The primary and secondary outcomes for the study are listed below.  
41  
42  
43

#### 44 **Primary Outcome:**

- 45  
46  
47 1. The occurrence of Gestational Diabetes in both groups  
48  
49

#### 50 **Secondary outcomes:**

##### 51 **Maternal:**

- 52  
53  
54  
55  
56 1. Gestational weight gain.  
57
- 58  
59 2. Need for metformin or insulin therapy.  
60

3. Mode of delivery.
4. Hypertension in pregnancy

#### Fetal:

1. Large for Gestational Age at delivery (weight >95th centile for Gestation)
2. Small for Gestational Age at delivery (weight < 10th centile for Gestation)
3. Macrosomia (fetal weight  $\geq$  4000 g at delivery)
4. Shoulder dystocia and birth injury
5. Polyhydramnios.
6. NICU Admission for > 24 hours
7. Neonatal hypoglycaemia requiring intravenous Glucose
8. Preterm delivery (<37 weeks gestation)
9. Transient Tachypnea of the newborn
10. Respiratory distress syndrome

#### Inclusion and Exclusion criteria

All pregnant women booking for antenatal care at Sidra Medicine before 16 weeks of gestation will be approached to participate in the study and comprehensive written and oral information will be provided in both English and Arabic. This will ensure an early commencement of the study supplementation or placebo with sufficient time frame prior to undertaking the OGTT, thus optimizing any potential effect of the intervention. The following are the inclusion and exclusion criteria for the study:

1  
2  
3 Inclusion criteria:  
4  
5

- 6 1. Pregnant women booked for prenatal care at Sidra Medicine.
- 7
- 8 2. Gestational age less than 16 weeks.
- 9
- 10
- 11 3. Capacity to provide informed consent.
- 12
- 13
- 14 4. The absence of any of the exclusion criteria.
- 15

16  
17 Exclusion criteria:  
18  
19

- 20 1. Pre-Gestational diabetes.
- 21
- 22 2. Booking fasting glucose of  $\geq 5.1$  mmol/l (92 mg/dl)
- 23
- 24 3. Women on steroids during pregnancy.
- 25
- 26
- 27 4. Women using Metformin for any other disorder e.g. PCOS.
- 28
- 29
- 30 5. Women taking Myo-inositol as part of any supplementation.
- 31
- 32 6. Cancer- Not in remission.
- 33
- 34 7. Women who lack the capacity to provide informed consent.
- 35
- 36
- 37 8. Women who had bariatric surgery.
- 38
- 39 9. Involvement in another interventional trial.
- 40
- 41
- 42 10. Polyhydramnios.
- 43
- 44

45 Study Plan  
46  
47

48 Women who agree to participate will be invited to attend the research clinic where they will  
49  
50 be provided with detailed information about the study by the Principal investigator or  
51  
52 delegated Co-investigators and, if agreeable, a written consent form will be obtained.  
53

54  
55  
56 An acceptance rate of 50-60% is anticipated; hence, the target is to approach about 1000  
57  
58 women with a view to enrolling them in the study. The obstetric new antenatal booking  
59  
60

1  
2  
3 patient rate is between 8-14 per day and this translates into a projected average of 2860  
4  
5 patients annually, well above the recruitment target for this study. The study protocol is  
6  
7 consistent with the principles of the Declaration of Helsinki and participants will be required  
8  
9 to provide written informed consent prior to trial enrollment. The study overview is  
10  
11 summaries in (supplementary Diagram 1)  
12  
13  
14  
15

#### 16 Randomization and Study schedule

17  
18  
19 Randomization will be performed using computer-generated numbers, which would allocate  
20  
21 participants into either Myo-inositol or Placebo arms. Both Myo-inositol and Placebo will  
22  
23 have identical packaging prepared at source and supplied through Sidra pharmacy. All  
24  
25 research team members and research participants will be blinded to the content of the  
26  
27 research packs. The pharmacist shall seal, randomly number the sachets according to the  
28  
29 computer-generated scheme and will be the sole healthcare provider to have access to this  
30  
31 data until blinding is broken. Breaking blinding is possible after delivery and in cases of  
32  
33 adverse reactions or if severe side effects are encountered.  
34  
35  
36  
37  
38

39 The Myo-inositol pack will contain 2 g of Myo-inositol whereas the placebo pack will contain  
40  
41 a pharmacologically inert substrate, and both arms will have twice daily dosing. Monthly (30  
42  
43 days) supply of the trial packs will be supplied and the research nurse will make scheduled  
44  
45 contacts with all participants on a monthly basis, to arrange additional supply of trial packs  
46  
47 and check on compliance. These scheduled contacts will be linked to the regular antenatal  
48  
49 clinic schedules, so that participants do not have to make extra visits. All participants will  
50  
51 have standard antenatal care as per Sidra prenatal care pathway.  
52  
53  
54  
55

56  
57 The Oral Glucose Tolerance test (OGTT) will be performed at 24-28 weeks as per Sidra  
58  
59 protocol for routine screening for GDM and additional blood sample for C-peptide and  
60

1  
2  
3 Insulin will also be taken at the same time. All participants will complete at least 12 weeks  
4 of intervention or supplementation prior to undertaking the OGTT. Women will be advised  
5  
6 to continue using the trial packs regardless of OGTT results. Those who are diagnosed as  
7  
8 having GDM will have standard antenatal care as per Sidra prenatal care pathway.  
9  
10

11  
12  
13 Participants will be advised to stop study supplements only when admitted in spontaneous  
14 labour, for Induction of Labour or Lower Segment Caesarean Section, whichever comes  
15  
16 earlier. The remaining and unused sachets will be collected on admission for delivery to  
17  
18 evaluate patient compliance. The study schedule is summarised in (supplementary Table1)  
19  
20  
21

22  
23  
24 Participants who withdraw from the study, or who fail to return for follow-up assessments,  
25  
26 shall continue to have data collected from their routine diabetic or obstetrics clinic visits,  
27  
28 unless they specifically withdraw consent for this. Data collected during the trial will be  
29  
30 stored securely with appropriate data security governance in the hospital electronic System  
31  
32 for Health records as source document.  
33  
34  
35

### 36 37 Sample size and Statistical Analysis

38  
39  
40 The overall prevalence of newly detected diabetes in pregnancy in Qatar is 23.6%. A sample  
41  
42 size of 640 pregnant women, with 320 in each arm, is sufficient to detect a clinically  
43  
44 significant reduction of 40% in the incidence of GDM between groups using a two-tailed z-  
45  
46 test of proportions between two groups with 80% power and a 95% level of confidence,  
47  
48 accounting for 20% drop out rate. This 40% reduction represents a 23.6 % incidence of  
49  
50 newly detected diabetes in pregnancy in the placebo group and maximum of 14.2% in the  
51  
52 Myo-inositol group. All randomized subjects will be included in the analysis.  
53  
54  
55  
56  
57  
58  
59  
60

1  
2  
3 All statistical analyses will be applied using R and SAS v9.4 (SAS Institute). Statistical analyses  
4  
5 will include both descriptive (numerical and graphical) and inferential statistics. Graphical  
6  
7 analyses, where deemed appropriate, will be included in the analyses. Frequencies and  
8  
9 proportions will be used to summarize qualitative variables, whereas means, median,  
10  
11 standard deviation and quartiles will be used to summarize quantitative variables. The  
12  
13 Student's t-test and chi-squared test will be used to evaluate the differences between  
14  
15 continuous and categorical variables, respectively. Spearman's correlation coefficients will  
16  
17 be estimated to determine associations between quantitative variables. Logistic regression  
18  
19 analysis will be performed to estimate odds ratios (ORs) and to examine the predictive  
20  
21 effect of each factor. ORs and their 95% confidence intervals (95% CI) for associated factors  
22  
23 will be estimated and all statistical assessments will be considered significant at P-value <  
24  
25 0.05. The statistical analyses are directed towards the assessment of the objectives of the  
26  
27 study.  
28  
29  
30  
31  
32  
33  
34

#### 35 Data Monitoring Plan

36  
37  
38 The data-monitoring plan for this study includes the appointment of an independent expert  
39  
40 with the role of performing and overseeing the interim analysis for the study. Interim  
41  
42 analysis is planned at 12 months and/or at 50% of enrolment, whichever comes earlier. If  
43  
44 the interim analysis shows that the difference between the two arms reaches statistical  
45  
46 significance, the result of the analysis and recommendation for stopping the trial will be  
47  
48 communicated to the IRB.  
49  
50  
51  
52  
53  
54  
55  
56  
57  
58  
59  
60

## Discussion

The high prevalence of GDM among Qatari antenatal population with the associated maternal and perinatal morbidity, represents a significant burden on current and future healthcare resource utilization. More importantly, GDM remains an important surrogate marker for the future development of T2DM. Therefore, pregnancy is a unique and critical window of opportunity for interventions aimed at reducing the burden of Diabetes in Qatar in the long term.

Antenatal supplementation with Myo-inositol for the prevention of GDM is a relatively new and novel intervention. Myo-inositol is readily available as an FDA approved food supplement. Although the limited emerging evidence indicates that its use may be beneficial in reducing the incidence of GDM, further studies from different ethnic contexts and with differing risk factors, are urgently needed to assess its effects on maternal and neonatal outcomes. In view of its availability as a dietary supplement and its relatively low cost compared to traditional interventions for preventing GDM, exploring its potential role in reduction of GDM is a much needed and timely study for our population. In addition, such a study will contribute to the generalizable knowledge and direction of future research on GDM including comparison with other interventions (e.g. life style and Metformin).

### List of Abbreviations

GDM- Gestational Diabetes

FDA-Food and drugs administration

IDF-International Diabetes Federation

T2DM-Type 2 Diabetes Mellitus

1  
2  
3 OGTT-Oral Glucose Tolerance Test  
4  
5

6 COVID-19-Coronavirus disease-19  
7  
8

9 NICU-Neonatal intensive care unit  
10  
11  
12  
13  
14

## 15 **Declarations**

16  
17  
18  
19 Ethics approval and consent to participate: This study was approved by the Sidra Medicine  
20  
21 IRB on 12<sup>th</sup> April, 2021 with the approval reference number 1538656  
22  
23

24 Consent for publication: Written informed consent will be obtained for publication  
25  
26

27 Publication and dissemination plan: Planned publication in peer-reviewed journal.  
28  
29

30 All data generated or analyzed during this study will be included in the subsequent results  
31  
32 publication.  
33  
34

35  
36 Competing interests: The Authors declare that they have no competing interests.  
37  
38

39 Provenance and peer review: Not commissioned; externally peer reviewed.  
40  
41

42 Funding: The study is funded by Sidra Medicine, through the competitive Internal Research  
43  
44 Grant fund, following external peer review of the study. The funding arm of Sidra Medicine  
45  
46 is not involved in the design of the study, management, analysis, interpretation of data;  
47  
48 writing of the report; the decision to submit the report for publication or writing of the  
49  
50 protocol manuscript.  
51  
52  
53

54  
55 Patient and public involvement: No patient involved in the study.  
56  
57  
58  
59  
60



### Authors' contributions:

HA initiated the idea for the study, II, GO and HA produced the initial study design, GO prepared the draft manuscript. HA, II, OO, YF, AT, and GO contributed to the manuscript review. All authors read and approved the final manuscript.

Acknowledgements: Not applicable

Word count: 2681 words

### References

1. Buchanan TA, Xiang AH. Gestational diabetes mellitus. *J Clin Invest* [Internet]. 2005 [cited 2018 Sep 28]; 115:485. Available from: <http://www.jci.org>
2. Cho NH, Shaw JE, Karuranga S, Huang Y, da Rocha Fernandes JD, Ohlrogge AW, et al. IDF Diabetes Atlas: Global estimates of diabetes prevalence for 2017 and projections for 2045. *Diabetes Res Clin Pract* [Internet]. 2018 Apr [cited 2018 Sep 28]; 138:271–81. Available from: <https://linkinghub.elsevier.com/retrieve/pii/S0168822718302031>
3. Bashir M, Abdel-Rahman ME, Aboufotouh M, Eltahir F, Omar K, Babarinsa I, et al. Prevalence of newly detected diabetes in pregnancy in Qatar, using universal screening. 2018 [cited 2018 Sep 28]; Available from: <https://doi.org/10.1371/journal.pone.0201247>
4. HAPO Group THSCR. Hyperglycemia and Adverse Pregnancy Outcomes. *N Engl J Med* [Internet]. 2008 May 8 [cited 2018 Sep 29]; 358(19):1991–2002. Available from: <http://www.nejm.org/doi/abs/10.1056/NEJMoa0707943>
5. Farrar D. Hyperglycemia in pregnancy : prevalence, impact, and management challenges. 2016; 519–27.
6. Dall TM, Yang W, Halder P, Pang B, Massoudi M, Wintfeld N, et al. The economic burden of elevated blood glucose levels in 2012: diagnosed and undiagnosed diabetes, gestational diabetes mellitus, and prediabetes. *Diabetes Care*. 2014 Dec; 37(12):3172–9.
7. Damm P, Houshmand-Oeregaard A, Kelstrup L, Lauenborg J, Mathiesen ER, Clausen TD. Gestational diabetes mellitus and long-term consequences for mother and offspring: a view from Denmark. *Diabetologia* [Internet]. 2016 Jul 12 [cited 2018 Sep 28]; 59(7):1396–9. Available from: <http://link.springer.com/10.1007/s00125-016-3985-5>
8. Tam WH, Ma RCW, Ozaki R, Li AM, Chan MHM, Yuen LY, et al. In Utero Exposure to Maternal Hyperglycemia Increases Childhood Cardiometabolic Risk in Offspring. *Diabetes Care* [Internet]. 2017 May [cited 2018 Sep 28]; 40(5):679–86. Available from: <http://care.diabetesjournals.org/lookup/doi/10.2337/dc16-2397>

- 1  
2  
3 9. Ratner RE, Christophi CA, Metzger BE, Dabelea D, Bennett PH, Pi-Sunyer X, et al. Prevention of  
4 diabetes in women with a history of gestational diabetes: effects of metformin and lifestyle  
5 interventions. *J Clin Endocrinol Metab* [Internet]. 2008 Dec [cited 2018 Sep 28]; 93(12):4774–9.  
6 Available from: <https://academic.oup.com/jcem/article-lookup/doi/10.1210/jc.2008-0772>  
7  
8  
9 10. Bizzarri M, Carlomagno G. Inositol: history of an effective therapy for Polycystic Ovary Syndrome.  
10 *Eur Rev Med Pharmacol Sci* [Internet]. 2014 Jul [cited 2018 Sep 29]; 18(13):1896–903. Available  
11 from: <http://www.ncbi.nlm.nih.gov/pubmed/25010620>  
12  
13 11. Asplin I, Galasko G, Larner J. chiro-inositol deficiency and insulin resistance: a comparison of the  
14 chiro-inositol- and the myo-inositol-containing insulin mediators isolated from urine, hemodialysate,  
15 and muscle of control and type II diabetic subjects. *Proc Natl Acad Sci U S A* [Internet]. 1993 Jul 1  
16 [cited 2018 Sep 28]; 90(13):5924–8. Available from: <http://www.ncbi.nlm.nih.gov/pubmed/8392181>  
17  
18 12. D’anna R, Scilipoti A, Giordano D, Caruso C, Cannata ML, Lieta Interdonato M, et al. myo-Inositol  
19 Supplementation and Onset of Gestational Diabetes Mellitus in Pregnant Women With a Family  
20 History of Type 2 Diabetes A prospective, randomized, placebo-controlled study. *Diabetes Care*  
21 [Internet]. 2013 [cited 2018 Sep 28]; 36(4):854–857.  
22 Available from: <https://www.ncbi.nlm.nih.gov/pmc/articles/PMC3609506/pdf/854.pdf>  
23  
24 13. Crawford TJ, Crowther CA, Alsweiler J, Brown J. Antenatal dietary supplementation with myo-  
25 inositol in women during pregnancy for preventing gestational diabetes. *Cochrane Database Syst*  
26 *Rev.* 2015; 2015(12).  
27  
28 14. Zhang H, Lv Y, Li Z, Sun L, Guo W. The efficacy of myo-inositol supplementation to prevent  
29 gestational diabetes onset: a meta-analysis of randomized controlled trials. *J Matern Neonatal Med*  
30 [Internet]. 2018 Feb 6 [cited 2018 Sep 28]; 1–7.  
31 Available from: <http://www.ncbi.nlm.nih.gov/pubmed/29343138>  
32  
33 15. Guo X, Guo S, Miao Z, Li Z, Zhang H. Myo-inositol lowers the risk of developing gestational  
34 diabetic mellitus in pregnancies: A systematic review and meta-analysis of randomized controlled  
35 trials with trial sequential analysis. *J Diabetes Complications* [Internet]. 2018 Mar [cited 2018 Sep  
36 28]; 32(3):342–8. Available from: <https://linkinghub.elsevier.com/retrieve/pii/S105687271730225>  
37  
38  
39  
40  
41  
42  
43  
44  
45  
46  
47  
48  
49  
50  
51  
52  
53  
54  
55  
56  
57  
58  
59  
60

Diagram A, study overview.

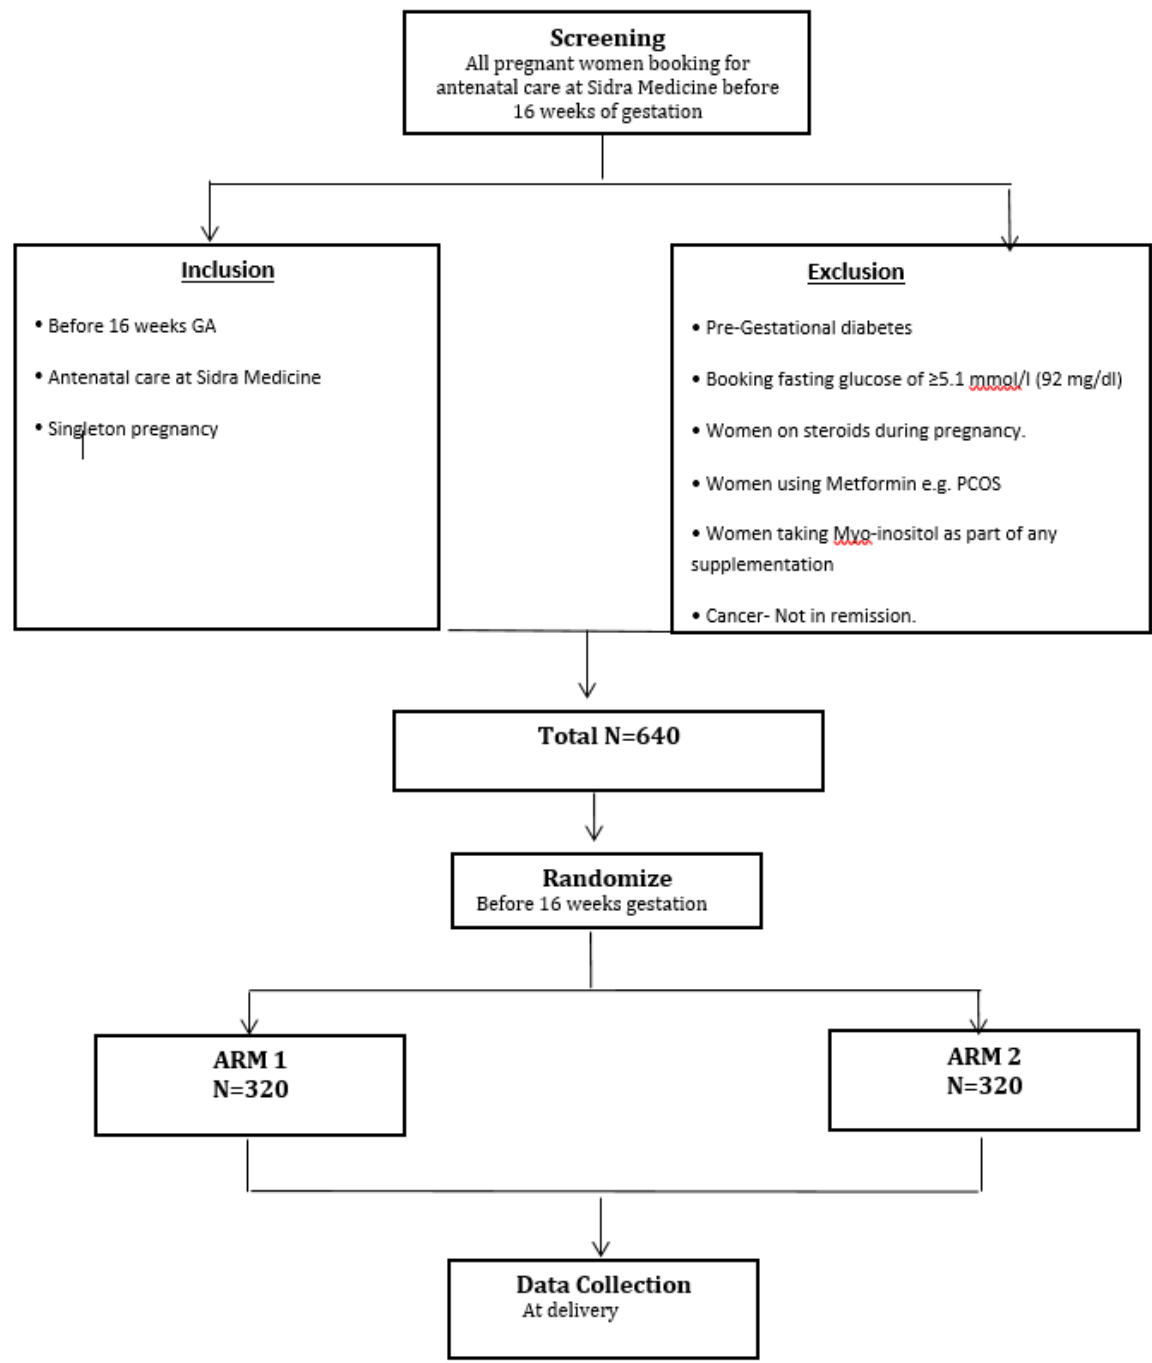

Table 1. MiGDM Study Overview

| Time point                 | 6-16 wks | 20 wks | 24 wks | 28 wks | 32 wks | 36 wks | 37 wks | 38 wks | 39 wks | 40 wks | Delivery |
|----------------------------|----------|--------|--------|--------|--------|--------|--------|--------|--------|--------|----------|
| <b>Measurement</b>         |          |        |        |        |        |        |        |        |        |        |          |
| Demographics               | X        |        |        |        |        |        |        |        |        |        |          |
| Family history             | X        |        |        |        |        |        |        |        |        |        |          |
| Pre-Pregnancy BMI          | X        |        |        |        |        |        |        |        |        |        |          |
| BP and HR                  | X        | X      | XX     | X      | X      | X      | X      | X      | X      | X      | X        |
| Physical activity          | X        |        |        |        |        |        |        |        |        |        |          |
| Maternal outcomes          |          |        |        |        |        |        |        |        |        |        | X        |
| Neonatal outcomes          |          |        |        |        |        |        |        |        |        |        | X        |
| C-peptide<br>Insulin, OGTT |          |        | X      | X      |        |        |        |        |        |        |          |
| Routine clinic tests       | X        |        |        |        |        |        |        |        |        |        |          |
| Ultrasound scan            |          | X      |        | X      | X      | X      |        |        |        |        |          |

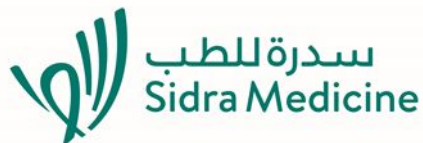

# SIDRA

## IRB RESEARCH PROPOSAL Template

### Section A

**A. Research Proposal Title:** Effect of antenatal dietary Myo-inositol supplementation in women during pregnancy on the incidence of gestational diabetes mellitus and fetal outcome : A randomized controlled trial (MiGDM TRIAL)

### B. Research Investigator:

Name (Last, First, MI): Ibrahim, Ibrahim, Mamoun  
 Title and Degrees: Senior Attending Physician MD FRCP  
 Department: Acute care Medicine  
 Phone Number(s): 30016566  
 Sidra Email: iibrahim1@sidra.org

### C. Co- Research Investigator: (If any)

1. **Name (Last, First, MI):** Okunoye, Gbemisola  
**Title and Degrees:** Senior Attending Physician MD  
**Department:** Obstetrics and Gynecology  
**Phone Number(s):** 30110337  
**Sidra Email:** gokunoye@sidra.org
2. **Name (Last, First, MI):** Abdullahi, Hala  
**Title and Degrees:** Attending Physician MD  
**Department:** Obstetrics and Gynecology  
**Phone Number(s):** 30488809  
**Sidra Email:** habdullahi@sidra.org
3. **Name (Last, First, MI):** Ortashi, Osman  
**Title and Degrees:** Senior Attending Physician MD  
**Department:** Obstetrics and Gynecology  
**Phone Number(s):** 77709536  
**Sidra Email:** oortashi@sidra.org
4. **Name (Last, First, MI):** Elkum, Naser  
**Title and Degrees:** Director - Biostatistics and Clinical Epidemiology Core PhD, MSc, BSc  
**Department:** Clinical Research Center Biostatistics Dept.  
**Phone Number(s):** 66824304  
**Sidra Email:** nelkum@sidra.org

1  
2  
3  
4  
5  
6 **5. Name (Last, First, MI):** Fagier, Yassin  
7 **Title and Degrees:** Attending Physician MD  
8 **Department:** Obstetrics and Gynecology  
9 **Phone Number(s):**30059100  
10 **Sidra Email:** [yfagier@sidra.org](mailto:yfagier@sidra.org)  
11 **6. Name (Last, First, MI):** Terranegra, Annalisa  
12 **Title and Degrees:** Principal Investigator, PhD  
13 **Department:** Research  
14 **Phone Number(s):** 40037396  
15 **Sidra Email:** [aterranegra@sidra.org](mailto:aterranegra@sidra.org)  
16  
17

## 18 Section B

19  
20  
21 **A. Summary:** Gestational Diabetes Mellitus (GDM) affects 23.6% of the Qatari women. GDM is a  
22 major pregnancy complication associated with both maternal and perinatal morbidity as well as  
23 long term risk of the development of type 2 diabetes (T2DM). In the last decade, multi modal  
24 evidence-based measures and interventions have been introduced in a bid to improve outcome of  
25 pregnancy in women with GDM. Whilst significant progress has been made, a number of challenges  
26 still remain with current interventions including; non-compliance with dietary advice, reluctance  
27 of mothers to ingest Metformin tablets or use Insulin injections. These challenges highlight the  
28 importance of pursuing evidence-based prevention strategies. Myo-inositol is readily available as  
29 an FDA approved food supplement. Although the limited emerging evidence indicates that its use  
30 may be beneficial in reducing the incidence of GDM, further studies from different ethnic contexts  
31 and with differing risk factors, are urgently needed to assess its effects on maternal and neonatal  
32 outcomes. We plan to conduct a prospective, randomized, double-blind, placebo controlled clinical  
33 trial looking at the effect of antenatal dietary Myo-inositol supplementation in women during  
34 pregnancy on the Incidence of GDM. Pregnant women attending antenatal clinic at Sidra Medicine  
35 will be randomised, within the first 16 weeks gestation, to either receiving Myo-inositol or placebo.  
36 The primary objective is to reduce the incidence of GDM, and the secondary objectives to reduce  
37 gestational weight gain, need for metformin or insulin therapy, macrosomia, polyhydramnios and  
38 neonatal hypoglycaemia. We hypothesize that the intervention will reduce the incidence of GDM  
39 by 40%  
40

41 **B. Introduction** Gestational diabetes mellitus (GDM) is defined as any degree of glucose intolerance  
42 with onset or first recognition during pregnancy. Identified risk factors for GDM include maternal  
43 age, maternal body mass index (BMI), ethnic background, family history, previous history of GDM  
44 and previous/current adverse pregnancy outcome (1). Globally, the International Diabetes  
45 Federation (IDF) estimates that 14% of all the deliveries are affected by GDM(2). Diabetes is a major  
46 public health issue in Qatar with increasing prevalence over the years. A recent study from Qatar  
47 showed that the prevalence of GDM among the Qatari women was 23.5% (3). GDM is a major  
48 pregnancy complication associated with both maternal and perinatal morbidity as well as long term  
49 risk of the development of type 2 diabetes (T2DM). Recently, the Hyperglycemia and Adverse  
50 Pregnancy Outcomes (HAPO) study, a multi-centric, observational study, evaluated the  
51 relationship between maternal hyperglycemia and adverse pregnancy outcomes, and identified  
52 elevated maternal serum glucose level during pregnancy as a major risk factor for adverse  
53 pregnancy outcomes, increasing rates of large-for-gestational-age infants, fetal hyperinsulinemia,  
54 neonatal hypoglycemia, and caesarean delivery (4).During pregnancy, GDM is associated with  
55 increased risk of pre-eclampsia, pre-term labor, Caesarean-section, macrosomia, shoulder  
56 dystocia, as well as a substantial increase in medical cost(5),(6).A study in Denmark showed that,  
57

1  
2  
3  
4  
5 by the age of 18-27 years, 21% of the offspring who were exposed to GDM during pregnancy have  
6 developed T2DM, which was eight-fold higher than the background population(7). It had also been  
7 shown that exposure to hyperglycemia in pregnancy is independently associated with the  
8 offspring's risk of abnormal glucose tolerance, obesity, and higher blood pressure at 7 years of  
9 age(8).In the last decade, multi modal evidence-based measures and interventions have been  
10 introduced in a bid to improve outcome of pregnancy in women with GDM. It has also been shown  
11 that both life style modifications and Metformin therapy are effective in delaying or preventing  
12 diabetes in women with a history of GDM (9). Whilst significant progress has been made, a number  
13 of challenges still remain with current interventions including; non-compliance with dietary advice,  
14 reluctance of mothers to ingest Metformin tablets or use Insulin injections. These challenges  
15 highlight the importance of pursuing evidence-based prevention strategies. Inositol has been  
16 proposed as a food supplement that might reduce gestational diabetes incidence in high-risk  
17 pregnant women. Myo-inositol, an isomer of inositol, is a naturally occurring sugar commonly  
18 found in cereals, corn, legumes and meat. It is classed as a dietary supplement by the US Food and  
19 Drug Administration. It is one of the intracellular mediators of the insulin signaling pathway and  
20 correlated with insulin sensitivity in T2DM. It is an insulin-sensitizing mediator which is reported to  
21 reduce plasma glucose levels in polycystic ovary syndrome where it has gained increasing attention  
22 and used for its unique property of reducing insulin resistance. Inositol (in the MI or DCI isoforms)  
23 was reported to improve insulin sensitivity and ovulatory function in young women affected by  
24 polycystic ovary syndrome (10).Chiro- and Myo-inositols are major components of the two inositol  
25 phosphoglycan mediators of insulin action. It was found that, patients with Type 2 diabetes  
26 compared to controls have less active chiro-inositol-containing mediator fractions form and a  
27 significantly reduced chiro-inositol to myo-inositol ratio (11). In a prospective RCT including  
28 pregnant women with a parent with type 2 diabetes who were treated from the end of the first  
29 trimester with 2 g Myo-inositol plus 200 mcg folic acid twice a day (n = 110) and in the placebo  
30 group (n = 110), who were only treated with 200 mcg folic acid twice a day; Myo-Inositol  
31 supplementation reduced the incidence of GDM (6 vs. 15.3%, P = 0.04) as well as the incidence of  
32 the delivery of a macrosomic fetus (12).The potential beneficial effect on improving insulin  
33 sensitivity suggests that it may be useful for preventing GDM. Although Myo-inositol shows  
34 promise in preventing GDM, there is not enough evidence at this stage to support its routine use.  
35 A Cochrane Database Systematic Review in 2015 looked at the  
36 antenatal dietary supplementation with myo-inositol in women during pregnancy for  
37 preventing gestational diabetes concluded that there is evidence from four trials of a potential  
38 benefit for reducing the incidence of gestational diabetes, although there was no consensus on  
39 neonatal outcomes. The authors recommended further studies to include pregnant women of  
40 different ethnicities and varying risk factors.(13).In a recent systematic review and meta-analysis  
41 including 5 RCTs, Myo-inositol supplementation is associated with significantly reduced incidence  
42 of gestational diabetes (risk ratio (RR) = 0.43; 95%CI = 0.21-0.89; p = .02), and preterm delivery  
43 (RR = 0.36; 95%CI = 0.17-0.73; p = .005), but has no substantial impact on 2-h glucose oral glucose  
44 tolerance test (OGTT) (mean difference (MD) = -6.90; 95%CI = -15.07 to 1.27; p = .10), gestational  
45 age at birth (MD = 0.74; 95%CI = -1.06 to 2.54; p = .42), birth weight (MD = -5.50; 95%CI = -116.99  
46 to 105.99; p = .92), and macrosomia (RR = 0.65; 95%CI = 0.20-2.11; p = .47) (14). Another recent  
47 systematic review also supported these findings in addition to a lower incidence of 2h OGTT values  
48 (15).

49 **C. Rationale** The high prevalence of GDM among Qatari antenatal population with the associated  
50 maternal and perinatal morbidity, represents a significant burden on current and future healthcare  
51 resource utilization. More importantly, GDM remains an important surrogate marker for the future  
52 development of T2DM. Therefore, pregnancy is a unique and critical window of opportunity for  
53 interventions aimed at reducing the burden of Diabetes in Qatar in the long term. Any reduction in  
54 the incidence of GDM in Qatar will potentially translate into a reduction in the burden of T2DM  
55 (among women) in the long term. Antenatal supplementation with Myo-inositol for the prevention  
56 of GDM is a relatively new and novel intervention. Myo-inositol is readily available as an FDA  
57



approved food supplement. Although the limited emerging evidence indicates that its use may be beneficial in reducing the incidence of GDM, further studies from different ethnic contexts and with differing risk factors, are urgently needed to assess its effects on maternal and neonatal outcomes. Our team at Sidra is well positioned to undertake this task in Qatar, the outcome of which could have significant impact on Diabetes care locally in Qatar and the region. Myo-inositol has been employed in previous clinical trials in pregnancy with no reported adverse effects. In view of its availability as a dietary supplement and its relatively low cost compared to traditional interventions for preventing GDM, exploring its potential role in reduction of GDM is a much needed and timely study for our population in Qatar. In addition, such a study will contribute to the generalizable knowledge and direction of future research on GDM including comparison with other interventions (e.g. life style and Metformin).

## Section C

**A. Research Objective:** (State aims and objectives concisely defined, following on from hypothesis)  
This study is a prospective, randomized, double-blind, placebo controlled clinical trial, to either Myo-inositol supplementation or placebo.

Hypothesis: Myo-inositol supplementation in pregnancy reduces the risk of developing GDM.

Primary Outcome:

The occurrence of GDM in both groups

Secondary outcomes:

Maternal:

Gestational weight gain.  
Need for metformin or insulin therapy.  
Mode of delivery  
Hypertension in pregnancy

Fetal:

Large for Gestational Age at delivery (weight >95th centile for Gestation)  
Small for Gestational Age at delivery (weight < 10th centile for Gestation)  
Macrosomia (fetal weight  $\geq$  4000 g at delivery)  
Shoulder dystocia and birth injury  
Polyhydramnios.  
NICU Admission for > 24 hours  
Neonatal hypoglycaemia requiring intravenous Glucose  
Preterm delivery (<37 weeks gestation)  
Transient Tachypnea of the newborn  
Respiratory distress syndrome

Some of the above maternal and fetal secondary outcomes are particularly relevant to pregnancies complicated by Diabetes. Although any differences between the two groups may not reach statistical significance because of the sample size, the trend is still of relevance in the context of similar studies.

**B. Research Methods:** (Study Design and methods including the research questions, setting, participant(s), inclusion and exclusion, data analysis, retention strategies and withdrawal criteria)

1. Data collection management and methods of assessment or measurement of data.

2. Outcome measures and end points

Study design and population

This study is a prospective, randomized, double-blind, placebo controlled clinical trial, to either Myo-inositol supplementation or placebo

We plan to enroll 640 pregnant women attending antenatal care at Sidra Medicine, 320 in each arm.

Inclusion criteria



All pregnant women booking for antenatal care at Sidra Medicine before 16 weeks of gestation will be approached to participate in the study and comprehensive written and oral information will be provided in both English and Arabic. This will ensure an early commencement of the study supplementation or placebo with sufficient time frame prior to undertaking the OGTT, thus optimizing any potential effect of the intervention.

### **SUBJECT SELECTION**

#### **Inclusion criteria**

- All pregnant women booked for prenatal care at Sidra Medicine will be approached regardless of Age and regardless of language spoken and regardless of place for delivery
- Gestational age less than 16 weeks
- Capacity to provide informed consent
- The absence of any of the exclusion criteria

#### **Exclusion criteria**

- Pre-Gestational diabetes.
- Booking fasting glucose of  $\geq 5.1$  mmol/l (92 mg/dl)
- Women on steroids during pregnancy.
- Women using Metformin for any other disorder e.g. PCOS.
- Women taking Myo-inositol as part of any supplementation.
- Cancer- Not in remission.
- Women who lack the capacity to provide informed consent.
- Women who had bariatric surgery.
- Involvement in another interventional trial.
- Polyhydramnios (this is a very unlikely finding before 16 weeks)

#### **Subject withdrawal criteria**

- Participants who withdraw from the intervention protocol, or who fail to return for follow-up assessments, shall continue to have data collected from their routine diabetic or obstetrics clinic visits, unless they specifically withdraw consent for this.
- Data analysis shall use best available follow-up weights (closest within a window of  $\pm 3$  months from routine attendances) and end of study diabetes status for participants who discontinue the formal weight management programmed. (Drug intolerance, diet intolerance or poor compliance shall be recorded: these patients shall be included in ITT analysis).

#### **Basic Data collection**

Patient's initials and ID, date of birth, nationality, ethnicity, general medical history, list of the medications currently taken, gestational age, parity, previous pregnancies, multiple pregnancy (index pregnancy), congenital fetal anomaly( index pregnancy) lifestyle exposures including smoking, physical activity and diet. All participants will have height and weight recorded.

All study participants will be given randomization numbers. These randomization numbers will be available on encrypted computers stored in the premises of Sidra with access available only to Lead PI and another delegated member of the team.

- Data collected during the trial will be recorded electronically in CERNER (Sidra electronic System for Health records) as source document.
- CRF (Case Report Forms) will be electronically completed in an excel sheet using source data from CERNER.
- CRF has been developed, for all the data to be captured for each patient, please refer to CRF.

#### **Study protocol**

Women who agree to participate will be invited to attend the research clinic where they will be provided with detailed information about the study by the PI and delegated Co-investigators and, if agreeable, a written consent form will be obtained. In order to create a general awareness about the existence of this study, it will be mentioned on the Women's services page of Sidra Medicine website

1  
2  
3  
4  
5 as one of the planned/ongoing researches in women's services at Sidra. This is subject to approval and  
6 acceptance by Sidra communications and information unit  
7

8 We anticipate an acceptance rate of 50-60%, hence we expect to approach about 1000 women.  
9 Currently we have an intake (new patients) rate of between 8 and 14 per clinic day. This translates into  
10 a projected average of 2860 patients annually, well above the recruitment target for this study.  
11 The study protocol is consistent with the principles of the Declaration of Helsinki and participants will  
12 be required to provide written informed consent prior to trial enrollment.  
13 Information regarding study protocol, risks, expected outcome and contact details will be given.  
14 Standard complete history and anthropometric measurements will be documented.  
15  
16  
17  
18  
19  
20  
21  
22  
23  
24  
25  
26  
27  
28  
29  
30  
31  
32  
33  
34  
35  
36  
37  
38  
39  
40  
41  
42  
43  
44  
45  
46  
47  
48  
49  
50  
51  
52  
53  
54  
55  
56  
57

Diagram A, study overview.

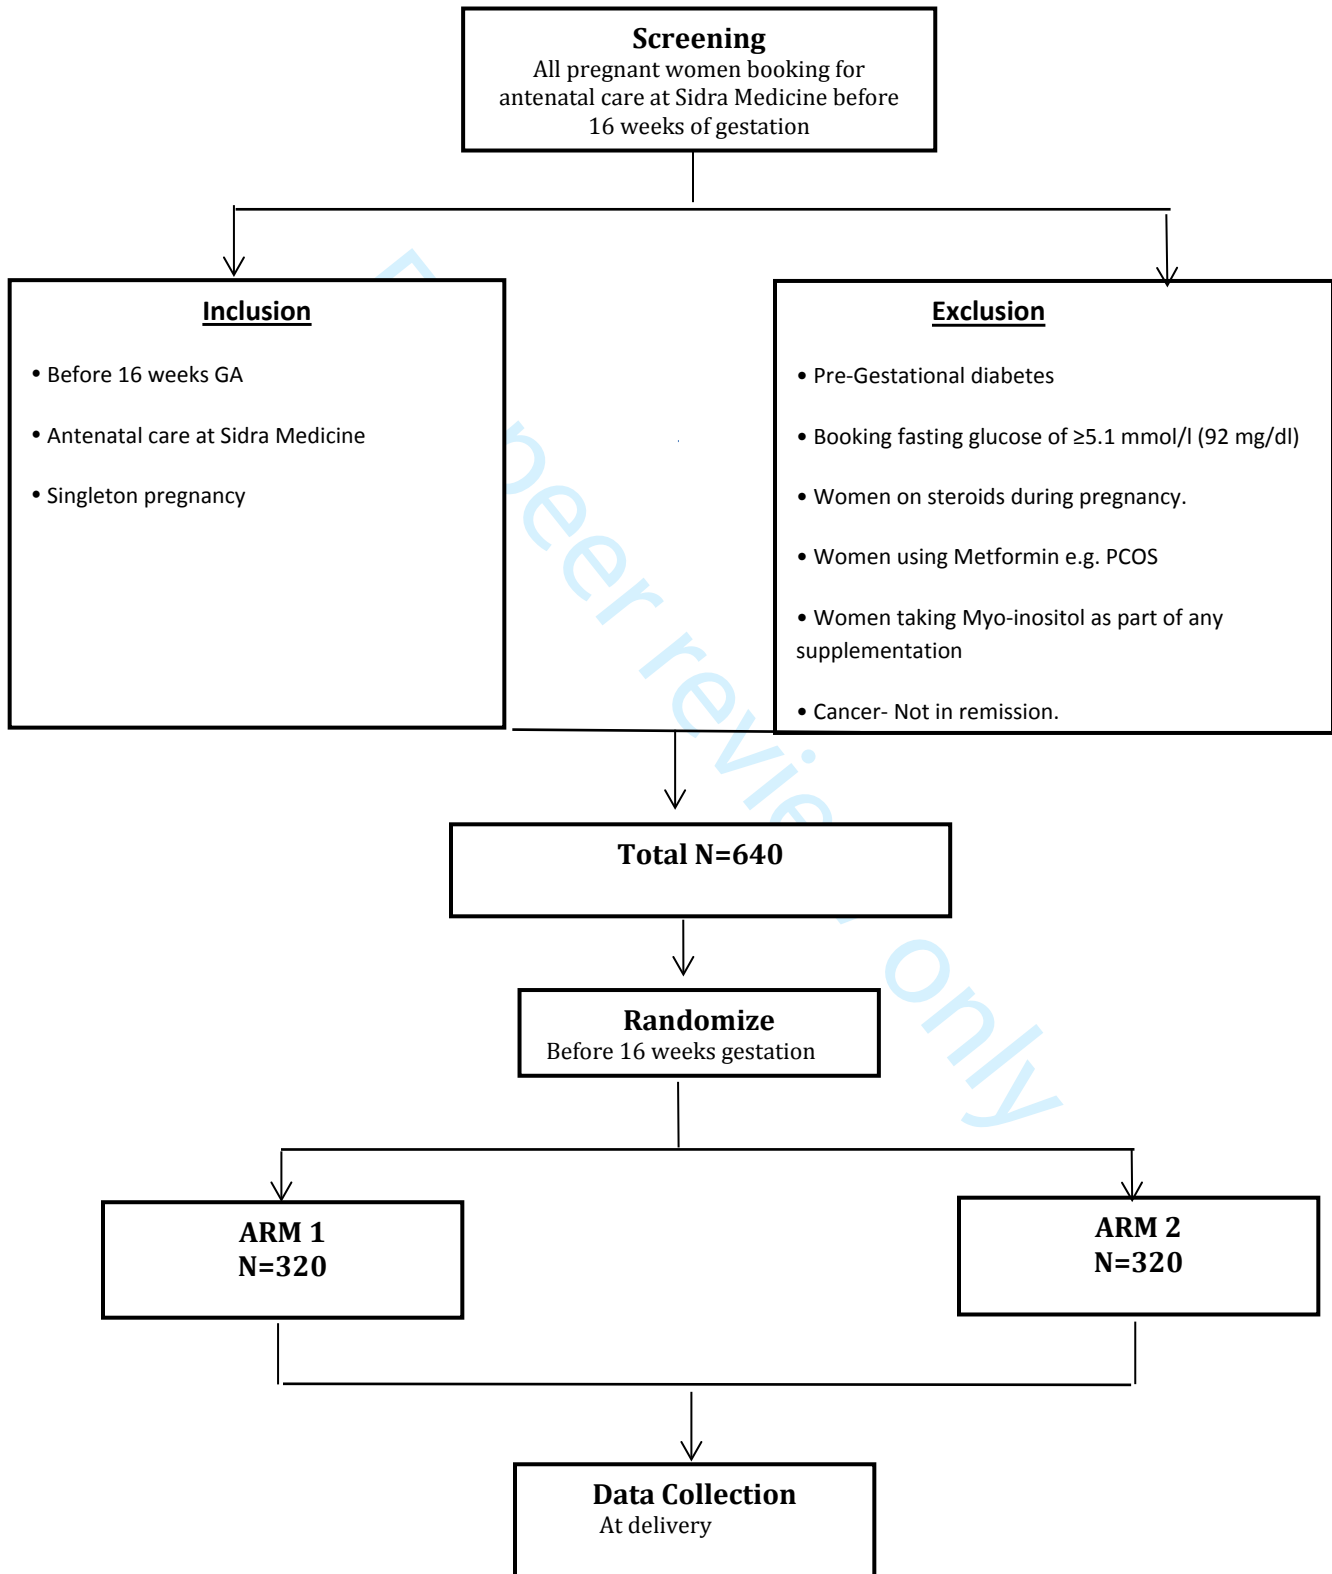

**Description of the sequence and duration of all trial periods, including follow-up:**

- Recruitment will continue for 18 months with a closing window of 6 months.
- The duration of study participation in this study will last between 24 weeks to 32 weeks (depending on the time of randomization, usually before 16 weeks of gestation)
- We also expect that this research study will last approximately two years to complete recruitment although each participant involvement will only be until the end of their pregnancy.
- These scheduled contacts will be linked to their regular antenatal clinic schedules, so that participants do not have to make extra visits.
- All participants will have standard antenatal care as per Sidra prenatal care pathway.
- The Oral Glucose Tolerance test (OGTT) will be performed at 24-28 weeks as usual per Sidra protocol for routine screening for GDM.
- All participants will complete at least 12 weeks of intervention or supplementation prior to undertaking the OGTT.
- Women will be advised to continue using the trial packs regardless of GTT results.
- Those who are diagnosed as having GDM will have standard antenatal care as per Sidra prenatal care pathway for women diagnosed with GDM.

| Time point                 | 6-16 wks | 20 wks | 24 wks | 28 wks | 32 wks | 36 wks | 37 wks | 38 wks | 39 wks | 40 wks | Delivery |
|----------------------------|----------|--------|--------|--------|--------|--------|--------|--------|--------|--------|----------|
| Measurement                |          |        |        |        |        |        |        |        |        |        |          |
| Demographics               | X        |        |        |        |        |        |        |        |        |        |          |
| Family history             | X        |        |        |        |        |        |        |        |        |        |          |
| Pre-Pregnancy BMI          | X        |        |        |        |        |        |        |        |        |        |          |
| BP and HR                  | X        | X      | XX     | X      | X      | X      | X      | X      | X      | X      | X        |
| Physical activity          | X        |        |        |        |        |        |        |        |        |        |          |
| Maternal outcomes          |          |        |        |        |        |        |        |        |        |        | X        |
| Neonatal outcomes          |          |        |        |        |        |        |        |        |        |        | X        |
| C-peptide<br>Insulin, OGTT |          |        | X      | X      |        |        |        |        |        |        |          |
| Routine clinic tests       | X        |        |        |        |        |        |        |        |        |        |          |
| Ultrasound scan            |          | X      |        | X      | X      | X      |        |        |        |        |          |

**Sample size:**

The overall prevalence of newly detected diabetes in pregnancy in Qatar is 23.6%.

Population: Patients attending antenatal care at Sidra Medicine. A sample size of 640 pregnant women, 320 in each arm, is sufficient to detect a clinically significant reduction of 40% in the incidence of GDM between groups using a two-tailed z-test of proportions between two groups with 80% power and a 95% level of confidence, accounting for 20% drop out rate. This 40% reduction represents a 23.6 % incidence of newly detected diabetes in pregnancy in the placebo group and maximum of 14.2% in the Myo-inositol group.

**Statistical analysis:** All randomized subjects will be included in the analysis.

All statistical analyses will be applied using R and SAS v9.4 (SAS Institute). Statistical analyses will include both descriptive (numerical and graphical) and inferential statistics. Graphical analyses, where deemed appropriate, will be included in the analyses. Frequencies and proportions will be used to summarize qualitative variables, whereas means, median, standard deviation and quartiles will be

used to summarize quantitative variables. The Student's t-test and chi-squared test were used to evaluate the differences between continuous and categorical variables, respectively. Spearman's correlation coefficients were estimated to determine associations between quantitative variables. Logistic regression analysis will be performed to estimate odds ratios (ORs) and to examine the predictive effect of each factor on infection risk. ORs and their 95% confidence intervals (95% CI) for associated factors were estimated. All statistical assessments were two-sided and considered significant at P-value < 0.05. The statistical analyses are directed towards the assessment of the objectives of the study. Based on the trial findings, we aim to develop a predictive model of response to Myo-inositol supplementation in pregnancy that incorporates a composite of demographic, biophysical and biochemical (HOMA-IR) indices.

#### **Data Monitoring Plan**

The data-monitoring plan for this study includes the appointment of Dr. Mamoun Elawad as an independent expert with the role of performing and overseeing the interim analysis for the study. Interim analysis is planned at 12 months and/or at 50% of enrollment, whichever comes earlier. If the interim analysis shows that the difference between the two arms reaches statistical significance, the result of the analysis and recommendation for stopping the trial will be communicated to the IRB. The appointment of Dr X as the independent expert is subject to approval by the IRB. A Short biography of Dr Elawad, the data safety-monitoring expert for this study is attached.

#### **Summary of the known and potential risks and benefits to human subjects**

- There is evidence from trials of a potential benefit of Myo-inositol supplement during pregnancy in reducing the incidence of gestational diabetes, preterm delivery and a lower incidence of 2h OGTT values (reference 13, 14, and 15).
- There are no known or reported risks associated with taking the research supplements, having been used widely around the world up to 4 grams of inositol daily, had been taken by pregnant women in many studies without adverse effects (reference 16, 17 and 18).
- Inositol supplements is well-tolerated by most people. However, mild side effects have been reported with doses of 12 grams per day or higher. These include nausea, gas, difficulty sleeping, headache, dizziness and tiredness.
- The procedure of blood drawing (venipuncture) to obtain blood samples may be associated with fainting, pain, bruising, bleeding at the site of the needle entry and rarely inflammation or infection of the vein site and this is documented and explained in the patient consent form.

#### **Description, packaging and labelling of Investigational product**

The investigational product(s) should be packaged to prevent contamination and unacceptable deterioration during transport and storage.

- Myo-inositol/Placebo Sachets will be packaged within a white medication box and labelled as follows:

CLINICAL TRIAL MiGDM

'MYO-INOSITOL/PLACEBO Medication sachets'

Site name: Sidra Medicine

PI: Dr Ibrahim Ibrahim

Subject number: \_\_\_\_\_ (number inserted at time of dispensing)

Batch/Lot number: \_\_\_\_\_

Expiration date: \_\_\_\_\_

Please keep safe and store at 8°C-25°C.

#### **Randomization, Drug preparation and Blinding:**

The medicinal products Myo-Inositol and Placebo for the study will be manufactured, packaged and supplied by Nutrilinea S.r.l company based in Italy. Nutrilinea S.r.l will source the ingredients for the

1  
2  
3  
4  
5 manufacture of the medicinal products from two companies namely ZCHT-Zhucheng Haotian Pharm  
6 Co., Ltd and Vivatis Pharma. Nutrilinea company profile can be accessed at  
7 <https://nutrilineasrl.it/nutrilinea/>  
8  
9

### 10 **Risks, Side Effects and/or Discomforts**

11  
12 The potential risks and side effects associated with procedures involved in the research are as  
13 follows:

- 14 • Blood samples: possible side effects from blood drawing include faintness, inflammation of the  
15 vein, pain, bruising, or bleeding at the site of puncture. There is also a slight possibility of  
16 infection.
- 17 • Taking the research supplements: There is no known risk we are aware of that is associated  
18 with taking the research supplement, having been used widely around the world.  
19  
20  
21  
22  
23  
24  
25

## 26 **Section D**

### 27 **A. Ethical Issues Informed Consent:**

28  
29 The participant must sign and date the latest approved version of the Informed Consent form before  
30 any study specific procedure is performed.

31  
32 Written and verbal versions of the Informed consent will be presented to the participant detailing the  
33 exact nature of the study; the known side effects, what it will involve, the implications and constraints  
34 of the protocol, the known side effects and any risk involved in taking part. It will be clearly stated that  
35 the participant is free to withdraw from the study at any time for any reason without prejudice and  
36 with no obligation to give reasons for withdrawal. If a participant chooses to withdraw from the study  
37 after a period of participation, pregnancy care will continue to be provided according to the standard  
38 schedule of antenatal, intrapartum and postpartum care. The participant will be instructed to return  
39 the unused trial packs to the research nurse who will subsequently submit the unused packs to the  
40 trial Pharmacist.

41  
42 The participants will be allowed time to consider the information given and the opportunity for  
43 questions to make the decision whether they will take part in the study.

44  
45 Written Informed Consent will be obtained dated and signed by the participant and the person who  
46 obtained the Informed consent. The person who obtained the consent is suitably qualified and  
47 experienced and authorized by the Principal investigator. A copy of the Informed Consent will be given  
48 to the participant and the original signed form will be retained at the study site.

#### 49 **Safety reporting:**

50  
51 Any serious adverse event (SAE) will be reported to Sidra Medicine IRB and the Qatari Ministry of Public  
52 Health (MOPH). For MOPH reporting, Unanticipated Problem in terms of nature, frequency or severity.

53  
54 When an investigator receives a report of an external adverse event, the investigator should  
55 review the report and assess whether it identifies the adverse event as being:  
56  
57

1  
2  
3  
4  
5 (1) unexpected;  
6 (2) related or possibly related to participation in the research; and  
7 (3) serious or otherwise one that suggests that the research places subjects or others at a  
8 greater risk of physical or psychological harm than was previously known or recognized.  
9 Only adverse events that are identified in the report as meeting all three criteria must be  
10 reported promptly by the investigator to the IRB as unanticipated problems.  
11  
12

#### 13 Reporting of internal adverse events by investigators

14 Upon becoming aware of an adverse event, the investigator should assess whether the adverse event  
15 represents an unanticipated problem following the guidelines described above. If the investigator  
16 determines that the adverse event represents an unanticipated problem, the investigator must report  
17 it promptly to the IRB, the institution head, the funding body, and Department of Research at Qatar  
18 Ministry of Public Health.  
19

20 If the investigator determines that an adverse event is not an unanticipated problem, but the  
21 monitoring entity subsequently determines that the adverse event does in fact represent an  
22 unanticipated problem (for example, due to an unexpectedly higher frequency of the event), the  
23 monitoring entity should report this determination to the investigator, and such reports must be  
24 promptly submitted by the investigator to the IRB, the institution head, the funding body, and  
25 Department of Research at Qatar Ministry of Public Health.  
26  
27  
28

#### 29 Reporting of other unanticipated problems (not related to adverse events) by investigators

30 Upon becoming aware of any other incident, experience, or outcome (not related to an adverse  
31 event) that may represent an unanticipated problem, the investigator should assess whether the  
32 incident, experience, or outcome represents an unanticipated problem by applying the criteria  
33 described above. If the investigator determines that the incident, experience, or outcome  
34 represents an unanticipated problem, the investigator must report it promptly to the IRB, the  
35 institution head, the funding body, and Department of Research at Qatar Ministry of Public  
36 Health.  
37  
38  
39

40  
41 Subjects with confirmed adverse events will be followed up until the resolution of the event or up to  
42 the end of the trial period, whichever comes later.  
43

#### 44 **Quality Assurance:**

45 The sponsor will ensure that the trial is adequately monitored, at regular monitoring visits according  
46 to the developed monitoring plan., audited in accordance with the current approved protocol, relevant  
47 regulations and standard operating procedures

#### 48 Ethical and regulatory procedures:

49 Will ensure that the study is conducted in accordance with the principles of Helsinki Declaration and  
50 in full conformity with relevant regulations.

51 All protocol, Informed consent, Information sheet and leaflet will be submitted to Sidra IRB for  
52 approval beforehand, including all substantial amendments to the original approved documents.  
53

#### 54 **Reporting:**

55  
56  
57



1  
2  
3  
4  
5 The Principal investigator shall submit once a year throughout the study or on request, an annual  
6 progress report to the IRB committee, Sidra Medicine. In addition, an end of study notification and  
7 final report will also be submitted.  
8  
9  
10

11  
12  
13 **B. Data – Security:** (Confidentiality of patient data)

- 14  
15 • Participants' personnel health information (such as name, MRN, age, etc.) will not be used in this  
16 trial.  
17 • To protect the confidentiality of the participants, a randomization number will be assigned to each  
18 one.  
19 • As this trial is randomized, the number assigned to each participant is called a "randomization  
20 number" and will determine in which of the experimental or control group the participant is assigned.  
21 All data will be stored on an encrypted computer(s) stored in the premises of Sidra. In order to be de-  
22 identified and the list that links the randomization number back to the subject identity will be only  
23 accessible to the physicians, research nurse and LPI. The subjects will not be identified in any  
24 publications or presentations about this study. Only investigators included in the trial will be enabled  
25 to access specimens and data. The study will comply with the data Protection Act, which requires data  
26 to be anonymized as soon as it is practically possible.  
27  
28

29 **C. Confidentiality of Patient Data:** (Describe procedures for maintaining participant confidentiality  
30 and/or anonymity, especially if tape recording, photographs, movies or videotapes will be used.  
31

- 32 1. Privacy: Address how the privacy of individuals or groups will be maintained (e.g. , how participants  
33 will be afforded privacy while participating in research activities).  
34  
35 2. Confidentiality: How will the confidentiality of data be ensured? Outline all of the precautions that  
36 will be used to maintain the confidentiality of identifiable information.  
37

38 All participants will be anonymized and assigned a subject number on recruitment. There will be no  
39 patient identification details in the study and no tape-recording, photography, videos, movies taken at  
40 any time during the study.

41 All data will be stored in a password protected folder in a protected Sidra Medicine computer. This  
42 computer will be located in an office with swipe card access. Only de-identified data will be made  
43 publicly available.

44 Manually recorded forms sheets will be kept under lock and key in a filing cabinet in a secured office  
45 in the obstetrics department. Only the Principal investigator and other delegated PI(s) will have an  
46 access to the data. Forms and documents will be shredded in 3 years after manuscript completion and  
47 electronic data will also be destroyed at the same time.

48 **Procedure for accounting for missing, unused, and spurious data**

- 49 • Quality control (QC) would be applied to each stage of data handling to ensure that all data are  
50 reliable and have been processed correctly.  
51 • QC will be reviewed on a daily basis and needs to be addressed and assessing all the data needed  
52 and source documents collected.  
53  
54  
55  
56  
57

## Section E

### A. Timetable: (Realistic project schedule- Study plan showing flow chart of orders, timing & site of procedures)

| No  | Expected Outcome/ Deliverable                                                                                  | Due date                                                                                                        | Comments / more details                                                                                                                 |
|-----|----------------------------------------------------------------------------------------------------------------|-----------------------------------------------------------------------------------------------------------------|-----------------------------------------------------------------------------------------------------------------------------------------|
| 1   | Obtain Ethical Approval for the Study.                                                                         | Not yet applicable                                                                                              | Will be completed prior to the project start                                                                                            |
| 2   | First Planning Meeting of All Investigators.                                                                   | Within 4 weeks of notification of Study Funding                                                                 |                                                                                                                                         |
| 3   | Recruitment of 1 full time Research Nurse                                                                      | Within 12 weeks of Ethical Approval                                                                             |                                                                                                                                         |
| 4   | Recruitment of 1 part time Research coordinator                                                                | Within 12 weeks of Ethical Approval                                                                             |                                                                                                                                         |
|     | Recruitment of 1 part time Clinical Pharmacist                                                                 | Within 12 weeks of Ethical Approval                                                                             | For allocation and randomization                                                                                                        |
| 5   | Outpatient Clinic, WCMG and Pharmacy Staff-sensitization Meetings, and introduction of Research Nurses to all. | Within 2 weeks of recruitment of Research Nurses                                                                |                                                                                                                                         |
| 6   | Commencement of patient Recruitment into Study                                                                 | Within 3 months of Obtaining Ethical Approval.                                                                  |                                                                                                                                         |
| 7.  | First Investigators' Update Meeting                                                                            | Within 3 months of commencing recruitment.                                                                      | This will mainly address any feedback on recruitment so far, and if there are significant aspects of the study that require a re-visit. |
| 8.  | Quarterly Investigators' Update                                                                                | 4-months after First Investigator's Update and 4 monthly thereafter.                                            | The Study Statistician will provide an interim analysis of incoming data.                                                               |
| 9   | Pre-conclusion Investigator's Meeting                                                                          | 24 months after first recruitment, or 4 weeks after Principal Investigator expresses decision to stop the study |                                                                                                                                         |
| 10. | Presentation of preliminary data, definitive data and preparation of First Report                              | 27 months after patient recruitment                                                                             |                                                                                                                                         |

### B. References: List of all citation mentioned within the proposal)

1. Buchanan TA, Xiang AH. Gestational diabetes mellitus. J Clin Invest [Internet]. 2005 [cited 2018 Sep 28]; 115:485. Available from: <http://www.jci.org>

2. Cho NH, Shaw JE, Karuranga S, Huang Y, da Rocha Fernandes JD, Ohlrogge AW, et al. IDF Diabetes Atlas: Global estimates of diabetes prevalence for 2017 and projections for 2045. *Diabetes Res Clin Pract* [Internet]. 2018 Apr [cited 2018 Sep 28]; 138:271–81. Available from:  
<https://linkinghub.elsevier.com/retrieve/pii/S0168822718302031>
3. Bashir M, Abdel-Rahman ME, Aboufotouh M, Eltaher F, Omar K, Babarinsa I, et al. Prevalence of newly detected diabetes in pregnancy in Qatar, using universal screening. 2018 [cited 2018 Sep 28]; Available from: <https://doi.org/10.1371/journal.pone.0201247>
4. HAPO Group THSCR. Hyperglycemia and Adverse Pregnancy Outcomes. *N Engl J Med* [Internet]. 2008 May 8 [cited 2018 Sep 29]; 358(19):1991–2002. Available from:  
<http://www.nejm.org/doi/abs/10.1056/NEJMoa0707943>
5. Farrar D. Hyperglycemia in pregnancy : prevalence, impact, and management challenges. 2016; 519–27.
6. Dall TM, Yang W, Halder P, Pang B, Massoudi M, Wintfeld N, et al. The economic burden of elevated blood glucose levels in 2012: diagnosed and undiagnosed diabetes, gestational diabetes mellitus, and prediabetes. *Diabetes Care*. 2014 Dec; 37(12):3172–9.
7. Damm P, Houshmand-Oeregaard A, Kelstrup L, Lauenborg J, Mathiesen ER, Clausen TD. Gestational diabetes mellitus and long-term consequences for mother and offspring: a view from Denmark. *Diabetologia* [Internet]. 2016 Jul 12 [cited 2018 Sep 28]; 59(7):1396–9. Available from:  
<http://link.springer.com/10.1007/s00125-016-3985-5>
8. Tam WH, Ma RCW, Ozaki R, Li AM, Chan MHM, Yuen LY, et al. In Utero Exposure to Maternal Hyperglycemia Increases Childhood Cardiometabolic Risk in Offspring. *Diabetes Care* [Internet]. 2017 May [cited 2018 Sep 28]; 40(5):679–86. Available from:  
<http://care.diabetesjournals.org/lookup/doi/10.2337/dc16-2397>
9. Ratner RE, Christophi CA, Metzger BE, Dabelea D, Bennett PH, Pi-Sunyer X, et al. Prevention of diabetes in women with a history of gestational diabetes: effects of metformin and lifestyle interventions. *J Clin Endocrinol Metab* [Internet]. 2008 Dec [cited 2018 Sep 28]; 93(12):4774–9. Available from: <https://academic.oup.com/jcem/article-lookup/doi/10.1210/jc.2008-0772>
10. Bizzarri M, Carlomagno G. Inositol: history of an effective therapy for Polycystic Ovary Syndrome. *Eur Rev Med Pharmacol Sci* [Internet]. 2014 Jul [cited 2018 Sep 29]; 18(13):1896–903. Available from: <http://www.ncbi.nlm.nih.gov/pubmed/25010620>
11. Asplin I, Galasko G, Lerner J. chiro-inositol deficiency and insulin resistance: a comparison of the chiro-inositol- and the myo-inositol-containing insulin mediators isolated from urine, hemodialysate, and muscle of control and type II diabetic subjects. *Proc Natl Acad Sci U S A* [Internet]. 1993 Jul 1 [cited 2018 Sep 28]; 90(13):5924–8. Available from: <http://www.ncbi.nlm.nih.gov/pubmed/8392181>
12. D’anna R, Scilipoti A, Giordano D, Caruso C, Cannata ML, Lieta Interdonato M, et al. myo-Inositol Supplementation and Onset of Gestational Diabetes Mellitus in Pregnant Women With a Family History of Type 2 Diabetes A prospective, randomized, placebo-controlled study. *Diabetes Care* [Internet]. 2013 [cited 2018 Sep 28]; 36(4):854–857. Available from:  
<https://www.ncbi.nlm.nih.gov/pmc/articles/PMC3609506/pdf/854.pdf>

13. Crawford TJ, Crowther CA, Alsweiler J, Brown J. Antenatal dietary supplementation with myo-inositol in women during pregnancy for preventing gestational diabetes. *Cochrane Database Syst Rev*. 2015; 2015(12).

14. Zhang H, Lv Y, Li Z, Sun L, Guo W. The efficacy of myo-inositol supplementation to prevent gestational diabetes onset: a meta-analysis of randomized controlled trials. *J Matern Neonatal Med* [Internet]. 2018 Feb 6 [cited 2018 Sep 28]; 1–7. Available from:

<http://www.ncbi.nlm.nih.gov/pubmed/29343138>

15. Guo X, Guo S, Miao Z, Li Z, Zhang H. Myo-inositol lowers the risk of developing gestational diabetic mellitus in pregnancies: A systematic review and meta-analysis of randomized controlled trials with trial sequential analysis. *J Diabetes Complications* [Internet]. 2018 Mar [cited 2018 Sep 28]; 32(3):342–8. Available from: <https://linkinghub.elsevier.com/retrieve/pii/S105687271730225>

**C. Budgeting:** (Provide detail budget for each research and each core unit in their respective section of the application. Incorporate a detailed budget for all requested support for the first year)

| Item                                                                               | Unit cost (QAR) |              | Total cost (QAR) |
|------------------------------------------------------------------------------------|-----------------|--------------|------------------|
| Myo-inositol (4g per day) x 30 weeks(210 days, the cost of 4g is QR 2.39)          | 501.90          | 320 subjects | 160,608.00       |
| Placebo (4g per day) x 30 weeks(210 days the cost of 4g placebo material is QAR 1) | 210.00          | 320 subjects | 67,200.00        |
| Packaging ( Myo-inositol and Placebo)                                              | 210.00          | 640 subjects | 67,200.00        |
| Fasting Insulin at OGTT(Qatar)                                                     | 161.00          | 640 subjects | 103,040.00       |
| Clinical Pharmacist cost                                                           | 100.00          | 410 subjects | 41,200.00        |
| 1 Research Nurses (R9) working full time                                           | 25,000.00       | 24 months    | 600,000.00       |

|                                             |        |              |                     |
|---------------------------------------------|--------|--------------|---------------------|
| Patient information Leaflets                | 5.00   | 1000 leaflet | 5,000.00            |
| Telephone Bills for patient contact / month | 150.00 | 18 months    | 2,700.00            |
| Article Processing Fees for publication     | -      | -            | 5,400.00            |
| <b>Grand total (QAR)</b>                    |        |              | <b>1,052,348.00</b> |

#### Principal Investigator Statement of Compliance:

I understand and accept responsibility for ensuring the safety and welfare of all human subjects who participate in the proposed research project. I certify that all key personnel, including myself, sub/co-investigators, research coordinators, trainees, and students have completed the SIDRA required training on human subjects' protection. I agree to a continuing exchange of information with the SIDRA IRB including the requirements to (i) obtain IRB approval before making non-emergency changes/revisions to the project, except where necessary to eliminate apparent immediate hazards to subjects or others, (ii) provide progress reports to the SIDRA IRB at their request (and at least annually), and (iii) report promptly to the IRB all unanticipated problems and serious adverse events involving risk to human subjects (in accordance with required reporting timelines by the IRB (iv) Will accept responsibility to maintain original data and consent forms and submit them for review if requested.



**SIGNATURE OF INVESTIGATOR**

**DATE OF SIGNATURE: 16/12/2020**

1  
2  
3  
4  
5  
6  
7  
8  
9  
10  
11  
12  
13  
14  
15  
16  
17  
18  
19  
20  
21  
22  
23  
24  
25  
26  
27  
28  
29  
30  
31  
32  
33  
34  
35  
36  
37  
38  
39  
40  
41  
42  
43  
44  
45  
46  
47  
48  
49  
50  
51  
52  
53  
54  
55  
56  
57  
58  
59  
60

For peer review only

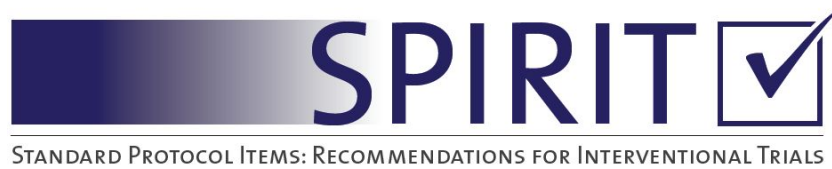

SPIRIT 2013 Checklist: Recommended items to address in a clinical trial protocol and related documents\*

| Section/item                      | Item No | Description                                                                                                                                                                                                                                                                                             |
|-----------------------------------|---------|---------------------------------------------------------------------------------------------------------------------------------------------------------------------------------------------------------------------------------------------------------------------------------------------------------|
| <b>Administrative information</b> |         |                                                                                                                                                                                                                                                                                                         |
| Title                             | 1       | Descriptive title identifying the study design, population, interventions, and, if applicable, trial acronym <b>Page 1</b>                                                                                                                                                                              |
| Trial registration                | 2a      | Trial identifier and registry name. If not yet registered, name of intended registry , <b>Trial registration section</b>                                                                                                                                                                                |
|                                   | 2b      | All items from the World Health Organization Trial Registration Data Set <b>Not applicable</b>                                                                                                                                                                                                          |
| Protocol version                  | 3       | Date and version identifier <b>Not applicable</b>                                                                                                                                                                                                                                                       |
| Funding                           | 4       | Sources and types of financial, material, and other support <b>Funding</b>                                                                                                                                                                                                                              |
| Roles and responsibilities        | 5a      | Names, affiliations, and roles of protocol contributors , <b>Authors , Authors affiliation and Authors contributions</b>                                                                                                                                                                                |
|                                   | 5b      | Name and contact information for the trial sponsor <b>Funding</b>                                                                                                                                                                                                                                       |
|                                   | 5c      | Role of study sponsor and funders, if any, in study design; collection, management, analysis, and interpretation of data; writing of the report; and the decision to submit the report for publication, including whether they will have ultimate authority over any of these activities <b>Funding</b> |
|                                   | 5d      | Composition, roles, and responsibilities of the coordinating centre, steering committee, endpoint adjudication committee, data management team, and other individuals or groups overseeing the trial, if applicable (see Item 21a for data monitoring committee) <b>Not applicable</b>                  |
| <b>Introduction</b>               |         |                                                                                                                                                                                                                                                                                                         |
| Background and rationale          | 6a      | Description of research question and justification for undertaking the trial, including summary of relevant studies (published and unpublished) examining benefits and harms for each intervention <b>Background and introduction</b>                                                                   |
|                                   | 6b      | Explanation for choice of comparators <b>Background and Introduction</b>                                                                                                                                                                                                                                |
| Objectives                        | 7       | Specific objectives or hypotheses <b>Aim and Hypothesis</b>                                                                                                                                                                                                                                             |

|    |                                                           |     |                                                                                                                                                                                                                                                                                                                                                                                                         |
|----|-----------------------------------------------------------|-----|---------------------------------------------------------------------------------------------------------------------------------------------------------------------------------------------------------------------------------------------------------------------------------------------------------------------------------------------------------------------------------------------------------|
| 1  |                                                           |     |                                                                                                                                                                                                                                                                                                                                                                                                         |
| 2  | Trial design                                              | 8   | Description of trial design including type of trial (eg, parallel group, crossover, factorial, single group), allocation ratio, and framework (eg, superiority, equivalence, noninferiority, exploratory) <b>Method/Design</b>                                                                                                                                                                          |
| 3  |                                                           |     |                                                                                                                                                                                                                                                                                                                                                                                                         |
| 4  |                                                           |     |                                                                                                                                                                                                                                                                                                                                                                                                         |
| 5  |                                                           |     |                                                                                                                                                                                                                                                                                                                                                                                                         |
| 6  |                                                           |     |                                                                                                                                                                                                                                                                                                                                                                                                         |
| 7  |                                                           |     |                                                                                                                                                                                                                                                                                                                                                                                                         |
| 8  | <b>Methods: Participants, interventions, and outcomes</b> |     |                                                                                                                                                                                                                                                                                                                                                                                                         |
| 9  |                                                           |     |                                                                                                                                                                                                                                                                                                                                                                                                         |
| 10 | Study setting                                             | 9   | Description of study settings (eg, community clinic, academic hospital) and list of countries where data will be collected. Reference to where list of study sites can be obtained <b>Method/Design</b>                                                                                                                                                                                                 |
| 11 |                                                           |     |                                                                                                                                                                                                                                                                                                                                                                                                         |
| 12 |                                                           |     |                                                                                                                                                                                                                                                                                                                                                                                                         |
| 13 |                                                           |     |                                                                                                                                                                                                                                                                                                                                                                                                         |
| 14 | Eligibility criteria                                      | 10  | Inclusion and exclusion criteria for participants. If applicable, eligibility criteria for study centres and individuals who will perform the interventions (eg, surgeons, psychotherapists) <b>Inclusion and exclusion criteria</b>                                                                                                                                                                    |
| 15 |                                                           |     |                                                                                                                                                                                                                                                                                                                                                                                                         |
| 16 |                                                           |     |                                                                                                                                                                                                                                                                                                                                                                                                         |
| 17 |                                                           |     |                                                                                                                                                                                                                                                                                                                                                                                                         |
| 18 |                                                           |     |                                                                                                                                                                                                                                                                                                                                                                                                         |
| 19 |                                                           |     |                                                                                                                                                                                                                                                                                                                                                                                                         |
| 20 | Interventions                                             | 11a | Interventions for each group with sufficient detail to allow replication, including how and when they will be administered <b>Randomization and Study schedule</b>                                                                                                                                                                                                                                      |
| 21 |                                                           |     |                                                                                                                                                                                                                                                                                                                                                                                                         |
| 22 |                                                           |     |                                                                                                                                                                                                                                                                                                                                                                                                         |
| 23 |                                                           |     |                                                                                                                                                                                                                                                                                                                                                                                                         |
| 24 |                                                           |     |                                                                                                                                                                                                                                                                                                                                                                                                         |
| 25 |                                                           | 11b | Criteria for discontinuing or modifying allocated interventions for a given trial participant (eg, drug dose change in response to harms, participant request, or improving/worsening disease) , <b>Randomization and Study schedule</b>                                                                                                                                                                |
| 26 |                                                           |     |                                                                                                                                                                                                                                                                                                                                                                                                         |
| 27 |                                                           |     |                                                                                                                                                                                                                                                                                                                                                                                                         |
| 28 |                                                           |     |                                                                                                                                                                                                                                                                                                                                                                                                         |
| 29 |                                                           |     |                                                                                                                                                                                                                                                                                                                                                                                                         |
| 30 |                                                           | 11c | Strategies to improve adherence to intervention protocols, and any procedures for monitoring adherence (eg, drug tablet return, laboratory tests) , <b>Randomization and Study schedule</b>                                                                                                                                                                                                             |
| 31 |                                                           |     |                                                                                                                                                                                                                                                                                                                                                                                                         |
| 32 |                                                           |     |                                                                                                                                                                                                                                                                                                                                                                                                         |
| 33 |                                                           |     |                                                                                                                                                                                                                                                                                                                                                                                                         |
| 34 |                                                           |     |                                                                                                                                                                                                                                                                                                                                                                                                         |
| 35 |                                                           | 11d | Relevant concomitant care and interventions that are permitted or prohibited during the trial <b>Randomization and Study schedule</b>                                                                                                                                                                                                                                                                   |
| 36 |                                                           |     |                                                                                                                                                                                                                                                                                                                                                                                                         |
| 37 |                                                           |     |                                                                                                                                                                                                                                                                                                                                                                                                         |
| 38 | Outcomes                                                  | 12  | Primary, secondary, and other outcomes, including the specific measurement variable (eg, systolic blood pressure), analysis metric (eg, change from baseline, final value, time to event), method of aggregation (eg, median, proportion), and time point for each outcome. Explanation of the clinical relevance of chosen efficacy and harm outcomes is strongly recommended <b>Outcomes measures</b> |
| 39 |                                                           |     |                                                                                                                                                                                                                                                                                                                                                                                                         |
| 40 |                                                           |     |                                                                                                                                                                                                                                                                                                                                                                                                         |
| 41 |                                                           |     |                                                                                                                                                                                                                                                                                                                                                                                                         |
| 42 |                                                           |     |                                                                                                                                                                                                                                                                                                                                                                                                         |
| 43 |                                                           |     |                                                                                                                                                                                                                                                                                                                                                                                                         |
| 44 |                                                           |     |                                                                                                                                                                                                                                                                                                                                                                                                         |
| 45 |                                                           |     |                                                                                                                                                                                                                                                                                                                                                                                                         |
| 46 | Participant timeline                                      | 13  | Time schedule of enrolment, interventions (including any run-ins and washouts), assessments, and visits for participants. A schematic diagram is highly recommended (see Figure) <b>Attachment: Table 1. MiGDM Study Overview , and Diagram 1; study overview</b>                                                                                                                                       |
| 47 |                                                           |     |                                                                                                                                                                                                                                                                                                                                                                                                         |
| 48 |                                                           |     |                                                                                                                                                                                                                                                                                                                                                                                                         |
| 49 |                                                           |     |                                                                                                                                                                                                                                                                                                                                                                                                         |
| 50 |                                                           |     |                                                                                                                                                                                                                                                                                                                                                                                                         |
| 51 |                                                           |     |                                                                                                                                                                                                                                                                                                                                                                                                         |
| 52 | Sample size                                               | 14  | Estimated number of participants needed to achieve study objectives and how it was determined, including clinical and statistical assumptions supporting any sample size calculations <b>Sample size and Statistical Analysis</b>                                                                                                                                                                       |
| 53 |                                                           |     |                                                                                                                                                                                                                                                                                                                                                                                                         |
| 54 |                                                           |     |                                                                                                                                                                                                                                                                                                                                                                                                         |
| 55 |                                                           |     |                                                                                                                                                                                                                                                                                                                                                                                                         |
| 56 |                                                           |     |                                                                                                                                                                                                                                                                                                                                                                                                         |
| 57 | Recruitment                                               | 15  | Strategies for achieving adequate participant enrolment to reach target sample size <b>Study plan</b>                                                                                                                                                                                                                                                                                                   |
| 58 |                                                           |     |                                                                                                                                                                                                                                                                                                                                                                                                         |
| 59 |                                                           |     |                                                                                                                                                                                                                                                                                                                                                                                                         |
| 60 |                                                           |     |                                                                                                                                                                                                                                                                                                                                                                                                         |



## Methods: Assignment of interventions (for controlled trials)

### Allocation:

|                                  |     |                                                                                                                                                                                                                                                                                                                                                                                                    |
|----------------------------------|-----|----------------------------------------------------------------------------------------------------------------------------------------------------------------------------------------------------------------------------------------------------------------------------------------------------------------------------------------------------------------------------------------------------|
| Sequence generation              | 16a | Method of generating the allocation sequence (eg, computer-generated random numbers), and list of any factors for stratification. To reduce predictability of a random sequence, details of any planned restriction (eg, blocking) should be provided in a separate document that is unavailable to those who enrol participants or assign interventions ) <b>Randomization and Study schedule</b> |
| Allocation concealment mechanism | 16b | Mechanism of implementing the allocation sequence (eg, central telephone; sequentially numbered, opaque, sealed envelopes), describing any steps to conceal the sequence until interventions are assigned <b>Randomization and Study schedule</b>                                                                                                                                                  |
| Implementation                   | 16c | Who will generate the allocation sequence, who will enrol participants, and who will assign participants to interventions <b>Randomization and Study schedule</b>                                                                                                                                                                                                                                  |
| Blinding (masking)               | 17a | Who will be blinded after assignment to interventions (eg, trial participants, care providers, outcome assessors, data analysts), and how <b>Randomization and Study schedule</b>                                                                                                                                                                                                                  |
|                                  | 17b | If blinded, circumstances under which unblinding is permissible, and procedure for revealing a participant's allocated intervention during the trial <b>Randomization and Study schedule</b>                                                                                                                                                                                                       |

## Methods: Data collection, management, and analysis

|                         |     |                                                                                                                                                                                                                                                                                                                                                                                                                                                   |
|-------------------------|-----|---------------------------------------------------------------------------------------------------------------------------------------------------------------------------------------------------------------------------------------------------------------------------------------------------------------------------------------------------------------------------------------------------------------------------------------------------|
| Data collection methods | 18a | Plans for assessment and collection of outcome, baseline, and other trial data, including any related processes to promote data quality (eg, duplicate measurements, training of assessors) and a description of study instruments (eg, questionnaires, laboratory tests) along with their reliability and validity, if known. Reference to where data collection forms can be found, if not in the protocol <b>Table 1. MiGDM Study Overview</b> |
|                         | 18b | Plans to promote participant retention and complete follow-up, including list of any outcome data to be collected for participants who discontinue or deviate from intervention protocols <b>Page 11 second paragraph</b>                                                                                                                                                                                                                         |
| Data management         | 19  | Plans for data entry, coding, security, and storage, including any related processes to promote data quality (eg, double data entry; range checks for data values). Reference to where details of data management procedures can be found, if not in the protocol <b>Informed consent ; Confidentially section 16</b>                                                                                                                             |
| Statistical methods     | 20a | Statistical methods for analysing primary and secondary outcomes. Reference to where other details of the statistical analysis plan can be found, if not in the protocol <b>Sample size and Statistical Analysis</b>                                                                                                                                                                                                                              |

- 1  
2 20b Methods for any additional analyses (eg, subgroup and adjusted  
3 analyses) [Sample size and Statistical Analysis](#)  
4  
5 20c Definition of analysis population relating to protocol non-adherence  
6 (eg, as randomised analysis), and any statistical methods to handle  
7 missing data (eg, multiple imputation) [Randomization and Study](#)  
8 [schedule](#) , [Sample size and Statistical Analysis](#)  
9

## 10 **Methods: Monitoring**

- 11  
12 Data monitoring 21a Composition of data monitoring committee (DMC); summary of its role  
13 and reporting structure; statement of whether it is independent from  
14 the sponsor and competing interests; and reference to where further  
15 details about its charter can be found, if not in the protocol.  
16 Alternatively, an explanation of why a DMC is not needed [Data](#)  
17 [monitoring](#)  
18  
19 21b Description of any interim analyses and stopping guidelines, including  
20 who will have access to these interim results and make the final  
21 decision to terminate the trial [Data monitoring](#)  
22  
23 Harms 22 Plans for collecting, assessing, reporting, and managing solicited and  
24 spontaneously reported adverse events and other unintended effects  
25 of trial interventions or trial conduct  
26 [IRB Research proposal under section Safety reporting:](#)  
27  
28 Auditing 23 Frequency and procedures for auditing trial conduct, if any, and  
29 whether the process will be independent from investigators and the  
30 sponsor [IRB Research proposal under section Quality assurance and](#)  
31 [Reporting](#)  
32  
33  
34  
35  
36

## 37 **Ethics and dissemination**

- 38  
39 Research ethics 24 Plans for seeking research ethics committee/institutional review board  
40 approval [Page 13, Ethics approval](#)  
41  
42 Protocol 25 Plans for communicating important protocol modifications (eg,  
43 amendments changes to eligibility criteria, outcomes, analyses) to relevant parties  
44 (eg, investigators, REC/IRBs, trial participants, trial registries, journals,  
45 regulators) [IRB Research proposal under section Reporting:](#)  
46  
47 Consent or assent 26a Who will obtain informed consent or assent from potential trial  
48 participants or authorised surrogates, and how (see Item 32) [Page 9,](#)  
49 [Study plan first paragraph](#)  
50  
51 26b Additional consent provisions for collection and use of participant data  
52 and biological specimens in ancillary studies, if applicable  
53 [Consent form section 23,24,25](#)  
54  
55 Confidentiality 27 How personal information about potential and enrolled participants will  
56 be collected, shared, and maintained in order to protect confidentiality  
57 before, during, and after the trial [Consent form section 16](#)  
58  
59  
60

|    |                   |     |                                                                                         |
|----|-------------------|-----|-----------------------------------------------------------------------------------------|
| 1  |                   |     |                                                                                         |
| 2  | Declaration of    | 28  | Financial and other competing interests for principal investigators for                 |
| 3  | interests         |     | the overall trial and each study site <a href="#">Page 13 and 14 Declarations and</a>   |
| 4  |                   |     | <a href="#">Competing interests</a> :                                                   |
| 5  |                   |     |                                                                                         |
| 6  | Access to data    | 29  | Statement of who will have access to the final trial dataset, and                       |
| 7  |                   |     | disclosure of contractual agreements that limit such access for                         |
| 8  |                   |     | investigators <a href="#">Consent form section 16 confidentiality</a>                   |
| 9  |                   |     |                                                                                         |
| 10 | Ancillary and     | 30  | Provisions, if any, for ancillary and post-trial care, and for                          |
| 11 | post-trial care   |     | compensation to those who suffer harm from trial participation                          |
| 12 |                   |     | <a href="#">Consent form section 14, 15</a>                                             |
| 13 |                   |     |                                                                                         |
| 14 |                   |     |                                                                                         |
| 15 | Dissemination     | 31a | Plans for investigators and sponsor to communicate trial results to                     |
| 16 | policy            |     | participants, healthcare professionals, the public, and other relevant                  |
| 17 |                   |     | groups (eg, via publication, reporting in results databases, or other                   |
| 18 |                   |     | data sharing arrangements), including any publication restrictions                      |
| 19 |                   |     | <a href="#">Page 14 Publication and dissemination plan</a>                              |
| 20 |                   |     |                                                                                         |
| 21 |                   |     |                                                                                         |
| 22 |                   |     |                                                                                         |
| 23 |                   |     |                                                                                         |
| 24 |                   |     |                                                                                         |
| 25 |                   |     |                                                                                         |
| 26 |                   | 31b | Authorship eligibility guidelines and any intended use of professional                  |
| 27 |                   |     | writers <a href="#">Page 14 Authors' contributions</a>                                  |
| 28 |                   |     |                                                                                         |
| 29 |                   |     |                                                                                         |
| 30 |                   | 31c | Plans, if any, for granting public access to the full protocol, participant-            |
| 31 |                   |     | level dataset, and statistical code <a href="#">Not applicable</a>                      |
| 32 |                   |     |                                                                                         |
| 33 |                   |     |                                                                                         |
| 34 | <b>Appendices</b> |     |                                                                                         |
| 35 |                   |     |                                                                                         |
| 36 | Informed consent  | 32  | Model consent form and other related documentation given to                             |
| 37 | materials         |     | participants and authorised surrogates <a href="#">IRB 400 Informed consent</a>         |
| 38 |                   |     | <a href="#">form attached</a>                                                           |
| 39 |                   |     |                                                                                         |
| 40 | Biological        | 33  | Plans for collection, laboratory evaluation, and storage of biological                  |
| 41 | specimens         |     | specimens for genetic or molecular analysis in the current trial and for                |
| 42 |                   |     | future use in ancillary studies, if applicable <a href="#">Relevant information are</a> |
| 43 |                   |     | <a href="#">included in IRB 400 Informed consent form</a>                               |
| 44 |                   |     |                                                                                         |

---

\*It is strongly recommended that this checklist be read in conjunction with the SPIRIT 2013 Explanation & Elaboration for important clarification on the items. Amendments to the protocol should be tracked and dated. The SPIRIT checklist is copyrighted by the SPIRIT Group under the Creative Commons "[Attribution-NonCommercial-NoDerivs 3.0 Unported](#)" license.

# BMJ Open

**The effect of antenatal dietary Myo-inositol supplementation on the incidence of Gestational Diabetes Mellitus and fetal outcome: Protocol for a double blind randomized controlled trial.**

|                                 |                                                                                                                                                                                                         |
|---------------------------------|---------------------------------------------------------------------------------------------------------------------------------------------------------------------------------------------------------|
| Journal:                        | <i>BMJ Open</i>                                                                                                                                                                                         |
| Manuscript ID                   | bmjopen-2021-055314.R1                                                                                                                                                                                  |
| Article Type:                   | Protocol                                                                                                                                                                                                |
| Date Submitted by the Author:   | 11-Nov-2021                                                                                                                                                                                             |
| Complete List of Authors:       | Ibrahim, Ibrahim; Sidra Medicine, Abdullahi, Hala; Sidra Medicine Fagier, Yassin; Sidra Medicine Ortashi, Osman; Sidra Medicine Terrangera, Annalisa; Sidra Medicine Okunoye, Gbemisola; Sidra Medicine |
| <b>Primary Subject Heading</b>: | Diabetes and endocrinology                                                                                                                                                                              |
| Secondary Subject Heading:      | Obstetrics and gynaecology                                                                                                                                                                              |
| Keywords:                       | Diabetes in pregnancy < DIABETES & ENDOCRINOLOGY, Maternal medicine < OBSTETRICS, NUTRITION & DIETETICS                                                                                                 |
|                                 |                                                                                                                                                                                                         |

SCHOLARONE™  
Manuscripts

**Title Page****Title of Study:**

The effect of antenatal dietary Myo-inositol supplementation on the incidence of Gestational Diabetes Mellitus and fetal outcome: Protocol for a double blind randomized controlled trial.

**Authors:**

1. Ibrahim Ibrahim<sup>1,2</sup>
2. Hala Abdullahi<sup>2,3</sup>
3. Yassin Fagier<sup>2,3</sup>
4. Osman Ortashi<sup>2,3</sup>
5. Annalisa Terranegra<sup>4</sup>
6. Gbemisola Okunoye<sup>2,3,5</sup>

**Authors email:**

1. [ibrahim2002@doctors.org.uk](mailto:ibrahim2002@doctors.org.uk)
2. [habdullahi@sidra.org](mailto:habdullahi@sidra.org)
3. [Yfagier@sidra.org](mailto:Yfagier@sidra.org)
4. [oortashi@sidra.org](mailto:oortashi@sidra.org)
5. [aterranegra@sidra.org](mailto:aterranegra@sidra.org)
6. [gokunoye@sidra.org](mailto:gokunoye@sidra.org)

**Authors Affiliation:**

1. Senior Attending Physician, Endocrinology, Sidra Medicine, Doha, Qatar
2. Assistant Professor, Weill Cornell Medicine-Qatar, Doha, Qatar
3. Senior Attending Physician, Obstetrics and Gynecology, Sidra Medicine, Doha, Qatar
4. Head of Laboratory of Precision Nutrition, Mother and Child Health Department, Research branch, Sidra Medicine, Doha, Qatar
5. Division Chief of Obstetrics (Acting), Sidra Medicine, Doha, Qatar

**Corresponding Author:**

Ibrahim Ibrahim

Sidra Medicine, Education City, Doha, Qatar

Email: [ibrahim2002@doctors.org.uk](mailto:ibrahim2002@doctors.org.uk)

## ABSTRACT

**Introduction:** Gestational Diabetes Mellitus (GDM) affects 23.6% of Qatari women and is associated with maternal and perinatal morbidity and long-term risk of developing type 2 diabetes (T2DM). A number of challenges exist with current interventions, including non-compliance with dietary advice, the reluctance of mothers to ingest Metformin tablets or use Insulin injections. These challenges highlight the importance of pursuing evidence-based prevention strategies. Myo-inositol is readily available as an FDA-approved food supplement with emerging but limited evidence suggesting it may be beneficial in reducing the incidence of GDM. Further studies, such as this one, from different ethnic contexts and with differing risk factors, are urgently needed to assess Myo-inositol effects on maternal and neonatal outcomes.

**Methods and analysis:** This study is a prospective, randomized, double-blinded, placebo controlled clinical trial to either Myo-inositol supplementation or placebo.

We plan to enrol 640 pregnant women attending antenatal care at Sidra Medicine, Doha, Qatar, 320 in each arm. All participants will complete at least 12 weeks of supplementation prior to undertaking the OGTT at 24-28 weeks. The daily use of the trial supplementation will continue until the end of pregnancy. All outcome measures will be collected from the electronic medical records.

**Ethics and dissemination:** Ethical approval for the study was obtained on 12/04/2021 from Sidra Medicine (IRB number 1538656). Results of the primary trial outcome and secondary endpoints will be submitted for publication in a peer-reviewed journal.

1  
2  
3 **Trial Registration:** Prospectively registered on 26/05/2021. Registration number  
4  
5  
6 ISRCTN16448440 (ISRCTN registry).  
7

8  
9 **Article Summary:**

10  
11  
12 **Strengths and limitations of this study**  
13

- 14  
15 • To our knowledge, this is the first large RCT in an ethnic population with a high  
16 prevalence of GDM to test the effectiveness of Myo-inositol supplementation.  
17  
18 • The early screening of diabetes in pregnancy used in Qatar ensures that women with  
19 pre-existing diabetes are excluded before enrolment.  
20  
21 • The duration of Myo-inositol supplementation prior to OGTT is variable, between 12  
22 and 20 weeks and this is a potential limitation of the study.  
23  
24 • The study may not have enough power to address some of the secondary outcome  
25 measures.  
26  
27  
28  
29  
30  
31  
32  
33  
34  
35  
36  
37

38 **Keywords:**

39  
40 Gestational Diabetes, Pregnancy, Myo-inositol, perinatal morbidity, Dietary  
41  
42 supplementation  
43  
44  
45  
46  
47  
48  
49  
50  
51  
52  
53  
54  
55  
56  
57  
58  
59  
60

## INTRODUCTION

Gestational diabetes mellitus (GDM) is defined as any degree of glucose intolerance with onset or first recognition during pregnancy (1). Identified risk factors for GDM include maternal age, maternal body mass index (BMI), ethnic background, family history, and previous history of GDM (1). Globally, the International Diabetes Federation (IDF) estimates that 14% of all deliveries are affected by GDM (2). Diabetes is a significant public health issue in Qatar with increasing prevalence over the years. A recent study from Qatar showed that the prevalence of GDM among Qatari women was 23.6% (3). GDM is a major pregnancy complication associated with both maternal and perinatal morbidity and long-term risk of the development of type 2 diabetes (T2DM). The Hyperglycemia and Adverse Pregnancy Outcomes (HAPO) study, a multi-centric, observational study, evaluated the relationship between maternal hyperglycemia and adverse pregnancy outcomes and identified elevated maternal serum glucose level during pregnancy as a major risk factor for adverse pregnancy outcomes, increasing rates of large-for-gestational-age infants, fetal hyperinsulinemia, neonatal hypoglycemia, and caesarean delivery (4). During pregnancy, GDM is associated with an increased risk of pre-eclampsia, preterm labor, Caesarean-section, macrosomia, shoulder dystocia, and a substantial increase in medical cost (5), (6). Exposure to hyperglycemia in pregnancy is shown to be associated with an increased risk to the offspring of abnormal glucose tolerance, Type 2 diabetes, obesity, and higher blood pressure (7), (8). In the last decade, multi-modal evidence-based measures and interventions have been introduced to improve the outcome of pregnancy in women with GDM. It has also been shown that both lifestyle modifications and Metformin therapy effectively delay or prevent diabetes in women with a history of GDM (9). Whilst significant progress has been made,



1  
2  
3 several challenges remain with current interventions, including non-compliance with dietary  
4  
5 advice and mothers' reluctance to ingest Metformin tablets or use Insulin injections. These  
6  
7 challenges highlight the importance of pursuing evidence-based prevention strategies.  
8  
9

10  
11 Inositol has been proposed as a food supplement that might reduce GDM incidence in high-  
12  
13 risk pregnant women. Myo-inositol, an isomer of inositol, is a naturally occurring sugar  
14  
15 commonly found in cereals, corn, legumes, and meat. The US Food and Drug Administration  
16  
17 class it as a dietary supplement. It is one of the intracellular mediators of the insulin  
18  
19 signaling pathway and correlated with insulin sensitivity in T2DM. It is an insulin-sensitizing  
20  
21 mediator, which is reported to reduce plasma glucose levels in polycystic ovary syndrome  
22  
23 (PCOS), where it has gained increasing attention and is used for its unique property of  
24  
25 reducing insulin resistance. Inositol isoforms were reported to improve insulin sensitivity  
26  
27 and ovulatory function in young women affected by PCOS (10). Chiro- and Myo-inositol are  
28  
29 major components of the two inositol phosphoglycan mediators of insulin action. Patients  
30  
31 with T2DM, compared to controls, have less active chiro-inositol-containing mediator  
32  
33 fractions and a significantly reduced chiro-inositol to Myo-inositol ratio (11). Myo-  
34  
35 inositol supplementation is shown in an RCT to reduce the incidence of GDM in pregnant  
36  
37 women with a parent with type 2 diabetes (6 %vs. 15.3%,  $P = 0.04$ ) as well as the incidence  
38  
39 of the delivery of a macrosomic fetus (12). The potential beneficial effect on improving  
40  
41 insulin sensitivity suggests that it may be useful for preventing GDM. Although Myo-inositol  
42  
43 shows promise in preventing GDM, there is not enough evidence at this stage to support its  
44  
45 routine use. A more recent Cochrane Database Systematic Review looked at the antenatal  
46  
47 dietary supplementation with Myo-inositol in women during pregnancy for preventing  
48  
49 GDM, concluded that there is evidence from four trials of a potential benefit for reducing  
50  
51 the incidence of GDM. However, there was no consensus on neonatal outcomes. The  
52  
53  
54  
55  
56  
57  
58  
59  
60

1  
2  
3 authors recommended further studies to include pregnant women of different ethnicities  
4  
5 and varying risk factors (13). Recent systematic reviews and meta-analyses have shown that  
6  
7 Myo-inositol supplementation is associated with a significantly reduced incidence of GDM  
8  
9 and preterm delivery (14)(15).  
10  
11

12  
13 Given the ready availability of Myo-inositol as a dietary supplement and its relatively low  
14  
15 cost compared to traditional interventions for preventing GDM, exploring its potential role  
16  
17 in reducing GDM is a much needed and timely study in a different socio-economic and  
18  
19 population context such as Qatar. Qatar's population is of multi-ethnic origin, including  
20  
21 Qataris and non-Qatari Arabs (residents of the Middle East and North Africa Region), Asian  
22  
23 (residents from the India sub-continent and the Philippines), and Caucasian expatriates. A  
24  
25 large RCT in this diverse population with high GDM risk will add to the available evidence of  
26  
27 the role of nutritional supplements to prevent GDM.  
28  
29  
30  
31  
32  
33  
34  
35  
36

## 37 **Methods/Design**

### 38 Aim and Hypothesis

39  
40  
41 This is a prospective, randomized, double blind, placebo controlled clinical trial to either  
42  
43 Myo-inositol supplementation or placebo. The study plans to enroll 640 pregnant women  
44  
45 attending antenatal care at Sidra Medicine, with 320 pregnant women in each arm. The  
46  
47 study overview is summarized in Figure 1 .  
48  
49  
50  
51

52  
53 The hypothesis for the study is that Myo-inositol in pregnancy reduces the risk of  
54  
55 developing Gestational Diabetes.  
56  
57  
58  
59  
60

1  
2  
3 Outcome Measures  
4  
5

6 Primary Outcome:  
7  
8

- 9 1. The occurrence of Gestational Diabetes in both groups  
10  
11

12 Secondary outcomes:  
13  
14

15 Maternal:  
16  
17

- 18 1. Gestational weight gain.  
19  
20 2. Need for Metformin or insulin therapy.  
21  
22 3. Mode of delivery.  
23  
24 4. Hypertensive disorders of pregnancy  
25  
26  
27  
28

29 Fetal:  
30  
31

- 32 1. Large for Gestational Age at delivery (weight >95th centile for Gestation)  
33  
34 2. Small for Gestational Age at delivery (weight < 10th centile for Gestation)  
35  
36 3. Macrosomia (fetal weight  $\geq$  4000 g at delivery)  
37  
38 4. Shoulder dystocia and birth injury  
39  
40 5. Polyhydramnios.  
41  
42 6. NICU Admission for > 24 hours  
43  
44 7. Neonatal hypoglycaemia requiring intravenous glucose  
45  
46 8. Preterm delivery (<37 weeks gestation)  
47  
48 9. Transient Tachypnea of the newborn  
49  
50 10. Respiratory distress syndrome (RDS)  
51  
52  
53  
54  
55  
56  
57  
58  
59  
60

1  
2  
3 Gestation diabetes (GDM) diagnosis is based on WHO (IADPSG) , one or more abnormal  
4 glucose values; (fasting blood glucose  $\geq 5.1$  mmol/l; 1-hour post 75 grams OGTT  $\geq 10.0$   
5 mmol/ l; and 2-hours post 75 grams OGTT  $\geq 8.5$  mmol/l (16).  
6  
7  
8  
9

10  
11 Pre-pregnancy weight is recorded in the initial visit based on patient self-report and is  
12 entered into the electronic medical records. We will use the last recorded weight at the  
13 time of delivery to calculate total gestational weight gain corrected for gestational age at  
14 delivery.  
15  
16  
17  
18  
19

20  
21 Macrosomia is defined as birth weight  $> 4000$  grams. LGA (Large for gestational age) is  
22 defined as birth weight  $>95^{\text{th}}$  percentile, and SGA (small for gestational age) is defined as  
23 birth weight  $<10^{\text{th}}$  percentile using the locally adapted growth charts. Preterm delivery is  
24 defined as delivery  $< 37$  weeks' Gestation.  
25  
26  
27  
28  
29

30  
31 Hypertensive disorders in pregnancy will be diagnosed based on the American College of  
32 Obstetrics and Gynaecology (17). Gestational hypertension is defined as a systolic blood  
33 pressure of 140 mm Hg or more or a diastolic blood pressure of 90 mm Hg or more, or both,  
34 on two occasions at least 4 hours apart after 20 weeks of gestation in a woman with a  
35 previously normal blood pressure. Women with gestational hypertension with severe range  
36 blood pressures (a systolic blood pressure of 160 mm Hg or higher, or diastolic blood  
37 pressure of 110 mm Hg or higher) are diagnosed with preeclampsia with severe features.  
38  
39 Pre-eclampsia is any raised blood pressure as above with significant Proteinuria of 300 mg  
40 or more per 24 hour urine collection or protein/creatinine ratio of 0.3 mg/dL or more or  
41 urine dipstick reading of 2+ of protein (17) .  
42  
43  
44  
45  
46  
47  
48  
49  
50  
51  
52  
53  
54  
55

56  
57 Shoulder dystocia is the use of any additional manoeuvres for the delivery of the baby after  
58 the delivery of the head, as documented by the delivering medical staff.  
59  
60

1  
2  
3 The diagnosis of neonatal hypoglycemia and respiratory distress syndrome (RDS) will be  
4  
5 extracted from the diagnosis section of the neonatal electronic medical records.  
6  
7

8  
9 Neonatal hypoglycemia will be diagnosed based on the Paediatric Endocrine Society and  
10  
11 British Association of Perinatal Medicine (BAPM). We will only include neonatal  
12  
13 hypoglycemia requiring intravenous glucose (18). Respiratory distress syndrome (RDS) is  
14  
15 coded in accordance with -ICD-10-CM Diagnosis Code.  
16  
17

### 18 19 Inclusion and Exclusion criteria

20  
21  
22 All pregnant women booking for antenatal care at Sidra Medicine before 16 weeks of  
23  
24 gestation will be approached to participate in the study. Comprehensive written and verbal  
25  
26 information will be provided in both English and Arabic. This will ensure early  
27  
28 commencement of the study supplementation or placebo with a sufficient period prior to  
29  
30 undertaking the OGTT, thus optimizing any potential effect of the intervention. The  
31  
32 following are the inclusion and exclusion criteria for the study:  
33  
34  
35

#### 36 37 Inclusion criteria:

- 38  
39 1. Pregnant women booked for prenatal care at Sidra Medicine.
- 40  
41 2. Gestational age less than 16 weeks.
- 42  
43 3. Capacity to provide informed consent.

#### 44 45 Exclusion criteria:

- 46  
47 1. Pre-gestational diabetes / pre-existing diabetes.
  - 48  
49 2. Fasting glucose of  $\geq 5.1$  mmol/l (92 mg/dl)
  - 50  
51 3. Women on steroids during pregnancy.
  - 52  
53 4. Women using Metformin for any other disorder, e.g., PCOS.
- 54  
55  
56  
57  
58  
59  
60

5. Women taking Myo-inositol as part of any supplementation.
6. Cancer- Not in remission.
7. Known allergy to Myo-inositol
8. Women who had bariatric surgery.
9. Involvement in another interventional trial.
10. Polyhydramnios.

### Study participants

Women who agree to participate will be invited to attend the research clinic. They will be provided with detailed information about the study by the Principal Investigator or delegated Co-investigators, and, if agreeable, a written consent form will be obtained.

An acceptance rate of 50-60% is anticipated; hence, the target is to approach about 1000 women with a view to enrolling them in the study. The average obstetric antenatal booking patient rate is between 8 to 14 per day, and this translates into a projected average of 2860 patients annually, well above the recruitment target for this study. The study protocol is consistent with the principles of the Declaration of Helsinki (IRB number 1538656), and participants will be required to provide written informed consent prior to trial enrollment.

The study overview is summarized in supplementary figure 1.

### Randomization and Study schedule

Randomization will be performed using computer-generated numbers, which would allocate participants into either Myo-inositol or Placebo arms. Both Myo-inositol and Placebo will have identical packaging prepared at the source and supplied through Sidra pharmacy. All research team members and research participants will be blinded to the content of the

1  
2  
3 research packs. The pharmacist shall seal, randomly number the sachets according to the  
4  
5 computer-generated scheme, and be the sole healthcare provider to access this data until  
6  
7 blinding is broken. Breaking blinding is possible after delivery and in cases of adverse  
8  
9 reactions or if severe side effects are encountered.  
10  
11

12  
13 The Myo-inositol pack will contain 2 g of Myo-inositol in the form of a sachet. The placebo  
14  
15 pack will contain a pharmacologically inert substrate in a similar packing to the Myo-inositol  
16  
17 sachets. Both Myo-inositol and Placebo sachets are to be taken twice a day. The pharmacist  
18  
19 will provide a monthly (30 days) supply of the trial packs. All participants will complete at  
20  
21 least 12 weeks of intervention or supplementation before undertaken OGTT. The Research  
22  
23 nurse, blinded to the research supplements, will arrange scheduled contacts with all  
24  
25 participants every month to arrange additional trial packs and check on compliance. These  
26  
27 scheduled contacts will be linked to the regular antenatal clinic schedules so that  
28  
29 participants do not have to make extra visits. All participants will have standard antenatal  
30  
31 care as per Sidra's prenatal care pathway.  
32  
33  
34  
35  
36  
37

38  
39 Participants will be advised to stop study supplements only when admitted in spontaneous  
40  
41 labour, for Induction of Labour or Lower Segment Caesarean Section, whichever comes  
42  
43 earlier. The remaining and unused sachets will be collected on admission for delivery to  
44  
45 evaluate patient compliance. The study schedule is summarised in the supplementary  
46  
47 Table1.  
48  
49  
50  
51  
52  
53  
54  
55  
56  
57  
58  
59  
60

## Clinical assessment

The Oral Glucose Tolerance Test (OGTT) will be performed at 24-28 weeks as per Sidra protocol for routine screening for GDM, and additional blood samples for C-peptide and Insulin will also be taken at the same time. All participants will complete at least 12 weeks of intervention or supplementation prior to undertaking the OGTT. Women will be advised to continue using the trial packs regardless of OGTT results. Those who are diagnosed as having GDM will have standard antenatal care as per Sidra prenatal care pathway.

Data regarding pregnancy course and delivery outcome will be collected by the research nurse. Lifestyle and dietary data will be collected at each visit by a dietician using 24hrs dietary recall and questionnaires and correlated with the study outcomes.

Participants who withdraw from the study or who fail to return for follow-up assessments shall continue to have data collected from their routine diabetic or obstetrics clinic visits unless they specifically withdraw consent for this. Data collected during the trial will be stored securely with appropriate data security governance in the hospital electronic System for Health records as a source document.

## Sample size and Statistical Analysis

The overall prevalence of newly detected diabetes in pregnancy in Qatar is 23.6%. A sample size of 640 pregnant women, with 320 in each arm, is sufficient to detect a clinically significant reduction of 40% in the incidence of GDM between groups using a two-tailed z-test of proportions between two groups with 80% power and a 95% level of confidence, accounting for 20% drop out rate. This 40% reduction represents a 23.6 % incidence of



1  
2  
3 newly detected diabetes in pregnancy in the placebo group and a maximum of 14.2% in the  
4  
5 Myo-inositol group. All randomized subjects will be included in the analysis.  
6  
7

8  
9 All statistical analyses will be applied using R and SAS v9.4 (SAS Institute). Statistical analyses  
10  
11 will include both descriptive (numerical and graphical) and inferential statistics. Graphical  
12  
13 analyses, where deemed appropriate, will be included in the analyses. Frequencies and  
14  
15 proportions will be used to summarize qualitative variables, whereas means, median,  
16  
17 standard deviation, and quartiles will be used to summarize quantitative variables. Two  
18  
19 sided Student's t-test and chi-squared test will be used to evaluate the differences between  
20  
21 continuous and categorical variables, respectively. Spearman's correlation coefficients will  
22  
23 be estimated to determine associations between quantitative variables. Logistic regression  
24  
25 analysis will be performed to estimate odds ratios (ORs) and to examine the predictive  
26  
27 effect of each factor. ORs and their 95% confidence intervals (95% CI) for associated factors  
28  
29 will be estimated, and all statistical assessments will be considered significant at P-value <  
30  
31 0.05. The statistical analyses are directed towards the assessment of the objectives of the  
32  
33 study.  
34  
35  
36  
37  
38  
39  
40

#### 41 Data Monitoring Plan

42  
43

44 The data-monitoring plan for this study includes the appointment of an independent expert  
45  
46 to perform and oversee the interim analysis for the study. An interim analysis is planned at  
47  
48 12 months and or at 50% of enrolment, whichever comes earlier. If the interim analysis  
49  
50 shows that the difference between the two arms reaches statistical significance, the result  
51  
52 of the analysis and recommendation for stopping the trial will be communicated to the IRB.  
53  
54  
55  
56  
57  
58  
59  
60

## List of Abbreviations

GDM- Gestational Diabetes

FDA-Food and drugs administration

IDF-International Diabetes Federation

T2DM-Type 2 Diabetes Mellitus

PCOS-Polycystic Ovarian syndrome

OGTT-Oral Glucose Tolerance Test

NICU-Neonatal intensive care unit

RDS-Respiratory distress syndrome

## Declarations

Ethics approval and consent to participate: This study was approved by the Sidra Medicine IRB on 12<sup>th</sup> April 2021 with the approval reference number 1538656.

Consent for publication: Written informed consent will be obtained for publication

Publication and dissemination plan: Planned publication in a peer-reviewed journal.

All data generated or analyzed during this study will be included in the publication of the subsequent results.

Competing interests: The authors declare that they have no competing interests.

Provenance and peer review: Not commissioned; externally peer-reviewed.

1  
2  
3 Funding: The study is funded by Sidra Medicine through the competitive Internal Research  
4  
5 Grant fund, following the external peer review of the study. The funding arm of Sidra  
6  
7  
8 Medicine is not involved in the design of the study, management, analysis, interpretation of  
9  
10 data; writing of the report; the decision to submit the report for publication or writing of the  
11  
12 protocol manuscript.  
13  
14

15  
16 Patient and public involvement: No patient involved in the study.  
17  
18

19  
20  
21  
22 **Authors' contributions:**  
23

24  
25 HA initiated the idea for the study, II, GO and HA produced the initial study design, GO  
26  
27 prepared the draft manuscript. HA, II, OO, YF, AT, and GO contributed to the manuscript  
28  
29 review. All authors read and approved the final manuscript.  
30  
31

32  
33 Acknowledgments: Not applicable  
34  
35

36  
37 Word count: 2580 words  
38  
39  
40  
41  
42  
43  
44  
45  
46  
47  
48  
49  
50  
51  
52  
53  
54  
55  
56  
57  
58  
59  
60

## References

1. Buchanan TA, Xiang AH. Gestational diabetes mellitus. *J Clin Invest* [Internet]. 2005 [cited 2018 Sep 28]; 115:485. Available from: <http://www.jci.org>
2. Cho NH, Shaw JE, Karuranga S, Huang Y, da Rocha Fernandes JD, Ohlrogge AW, et al. IDF Diabetes Atlas: Global estimates of diabetes prevalence for 2017 and projections for 2045. *Diabetes Res Clin Pract* [Internet]. 2018 Apr [cited 2018 Sep 28]; 138:271–81.  
Available from: <https://linkinghub.elsevier.com/retrieve/pii/S0168822718302031>
3. Bashir M, Abdel-Rahman ME, Aboufotouh M, Eltaher F, Omar K, Babarinsa I, et al. Prevalence of newly detected diabetes in pregnancy in Qatar, using universal screening. 2018 [cited 2018 Sep 28]; Available from: <https://doi.org/10.1371/journal.pone.0201247>
4. HAPO Group THSCR. Hyperglycemia and Adverse Pregnancy Outcomes. *N Engl J Med* [Internet]. 2008 May 8 [cited 2018 Sep 29]; 358(19):1991–2002.  
Available from: <http://www.nejm.org/doi/abs/10.1056/NEJMoa0707943>
5. Farrar D. Hyperglycemia in pregnancy : prevalence, impact, and management challenges. 2016; 519–27.
6. Dall TM, Yang W, Halder P, Pang B, Massoudi M, Wintfeld N, et al. The economic burden of elevated blood glucose levels in 2012: diagnosed and undiagnosed diabetes, gestational diabetes mellitus, and prediabetes. *Diabetes Care*. 2014 Dec; 37(12):3172–9.
7. Damm P, Houshmand-Oeregaard A, Kelstrup L, Lauenborg J, Mathiesen ER, Clausen TD. Gestational diabetes mellitus and long-term consequences for mother and offspring: a view from Denmark. *Diabetologia* [Internet]. 2016 Jul 12 [cited 2018 Sep 28]; 59(7):1396–9.  
Available from: <http://link.springer.com/10.1007/s00125-016-3985-5>
8. Tam WH, Ma RCW, Ozaki R, Li AM, Chan MHM, Yuen LY, et al. In Utero Exposure to Maternal Hyperglycemia Increases Childhood Cardiometabolic Risk in Offspring. *Diabetes Care* [Internet]. 2017 May [cited 2018 Sep 28]; 40(5):679–86. Available from: <http://care.diabetesjournals.org/lookup/doi/10.2337/dc16-2397>
9. Ratner RE, Christophi CA, Metzger BE, Dabelea D, Bennett PH, Pi-Sunyer X, et al. Prevention of diabetes in women with a history of gestational diabetes: effects of metformin and lifestyle interventions. *J Clin Endocrinol Metab* [Internet]. 2008 Dec [cited 2018 Sep 28]; 93(12):4774–9. Available from: <https://academic.oup.com/jcem/article-lookup/doi/10.1210/jc.2008-0772>
10. Bizzarri M, Carlomagno G. Inositol: history of an effective therapy for Polycystic Ovary Syndrome. *Eur Rev Med Pharmacol Sci* [Internet]. 2014 Jul [cited 2018 Sep 29]; 18(13):1896–903. Available from: <http://www.ncbi.nlm.nih.gov/pubmed/25010620>
11. Asplin I, Galasko G, Larner J. chiro-inositol deficiency and insulin resistance: a comparison of the chiro-inositol- and the myo-inositol-containing insulin mediators isolated from urine, hemodialysate, and muscle of control and type II diabetic subjects. *Proc Natl*

- 1  
2  
3 Acad Sci U S A [Internet]. 1993 Jul 1 [cited 2018 Sep 28]; 90(13):5924–8. Available from:  
4 <http://www.ncbi.nlm.nih.gov/pubmed/8392181>  
5  
6  
7 12. D'anna R, Scilipoti A, Giordano D, Caruso C, Cannata ML, Lieta Interdonato M, et al. myo-  
8 Inositol Supplementation and Onset of Gestational Diabetes Mellitus in Pregnant Women  
9 With a Family History of Type 2 Diabetes A prospective, randomized, placebo-controlled  
10 study. Diabetes Care [Internet]. 2013 [cited 2018 Sep 28]; 36(4):854–857. Available  
11 from:<https://www.ncbi.nlm.nih.gov/pmc/articles/PMC3609506/pdf/854.pdf>  
12  
13  
14 13. Crawford TJ, Crowther CA, Alsweiler J, Brown J. Antenatal dietary supplementation with  
15 myo-inositol in women during pregnancy for preventing gestational diabetes. Cochrane  
16 Database Syst Rev. 2015; 2015(12).  
17  
18  
19 14. Zhang H, Lv Y, Li Z, Sun L, Guo W. The efficacy of myo-inositol supplementation to  
20 prevent gestational diabetes onset: a meta-analysis of randomized controlled trials. J  
21 Matern Neonatal Med [Internet]. 2018 Feb 6 [cited 2018 Sep 28]; 1–7. Available  
22 from:<http://www.ncbi.nlm.nih.gov/pubmed/29343138>  
23  
24  
25 15. Guo X, Guo S, Miao Z, Li Z, Zhang H. Myo-inositol lowers the risk of developing  
26 gestational diabetic mellitus in pregnancies: A systematic review and meta-analysis of  
27 randomized controlled trials with trial sequential analysis. J Diabetes Complications  
28 [Internet]. 2018 Mar [cited 2018 Sep 28]; 32(3):342–8. Available from:  
29 <https://linkinghub.elsevier.com/retrieve/pii/S105687271730225>.  
30  
31  
32 16. Diagnostic Criteria and Classification of Hyperglycaemia First Detected in Pregnancy.  
33 [http://apps.who.int/iris/bitstream/10665/85975/1/WHO\\_NMH\\_MND\\_13.2\\_eng.pdf](http://apps.who.int/iris/bitstream/10665/85975/1/WHO_NMH_MND_13.2_eng.pdf)  
34  
35  
36 17. HYPE RTE N SION. [https://www.acog.org/~media/Task Force and Work Group](https://www.acog.org/~media/Task Force and Work Group Reports/public/HypertensioninPregnancy.pdf)  
37 [Reports/public/HypertensioninPregnancy.pdf](https://www.acog.org/~media/Task Force and Work Group Reports/public/HypertensioninPregnancy.pdf)  
38  
39  
40 18. Levene I, Wilkinson D. Identification and management of neonatal hypoglycaemia in the  
41 full-term infant (British Association of Perinatal Medicine—Framework for Practice).  
42 Archives of Disease in Childhood-Education and Practice. 2019 Feb 1;104(1):29-32.  
43  
44  
45  
46  
47  
48  
49  
50  
51  
52  
53  
54  
55  
56  
57  
58  
59  
60

# Diagram 1: A study overview

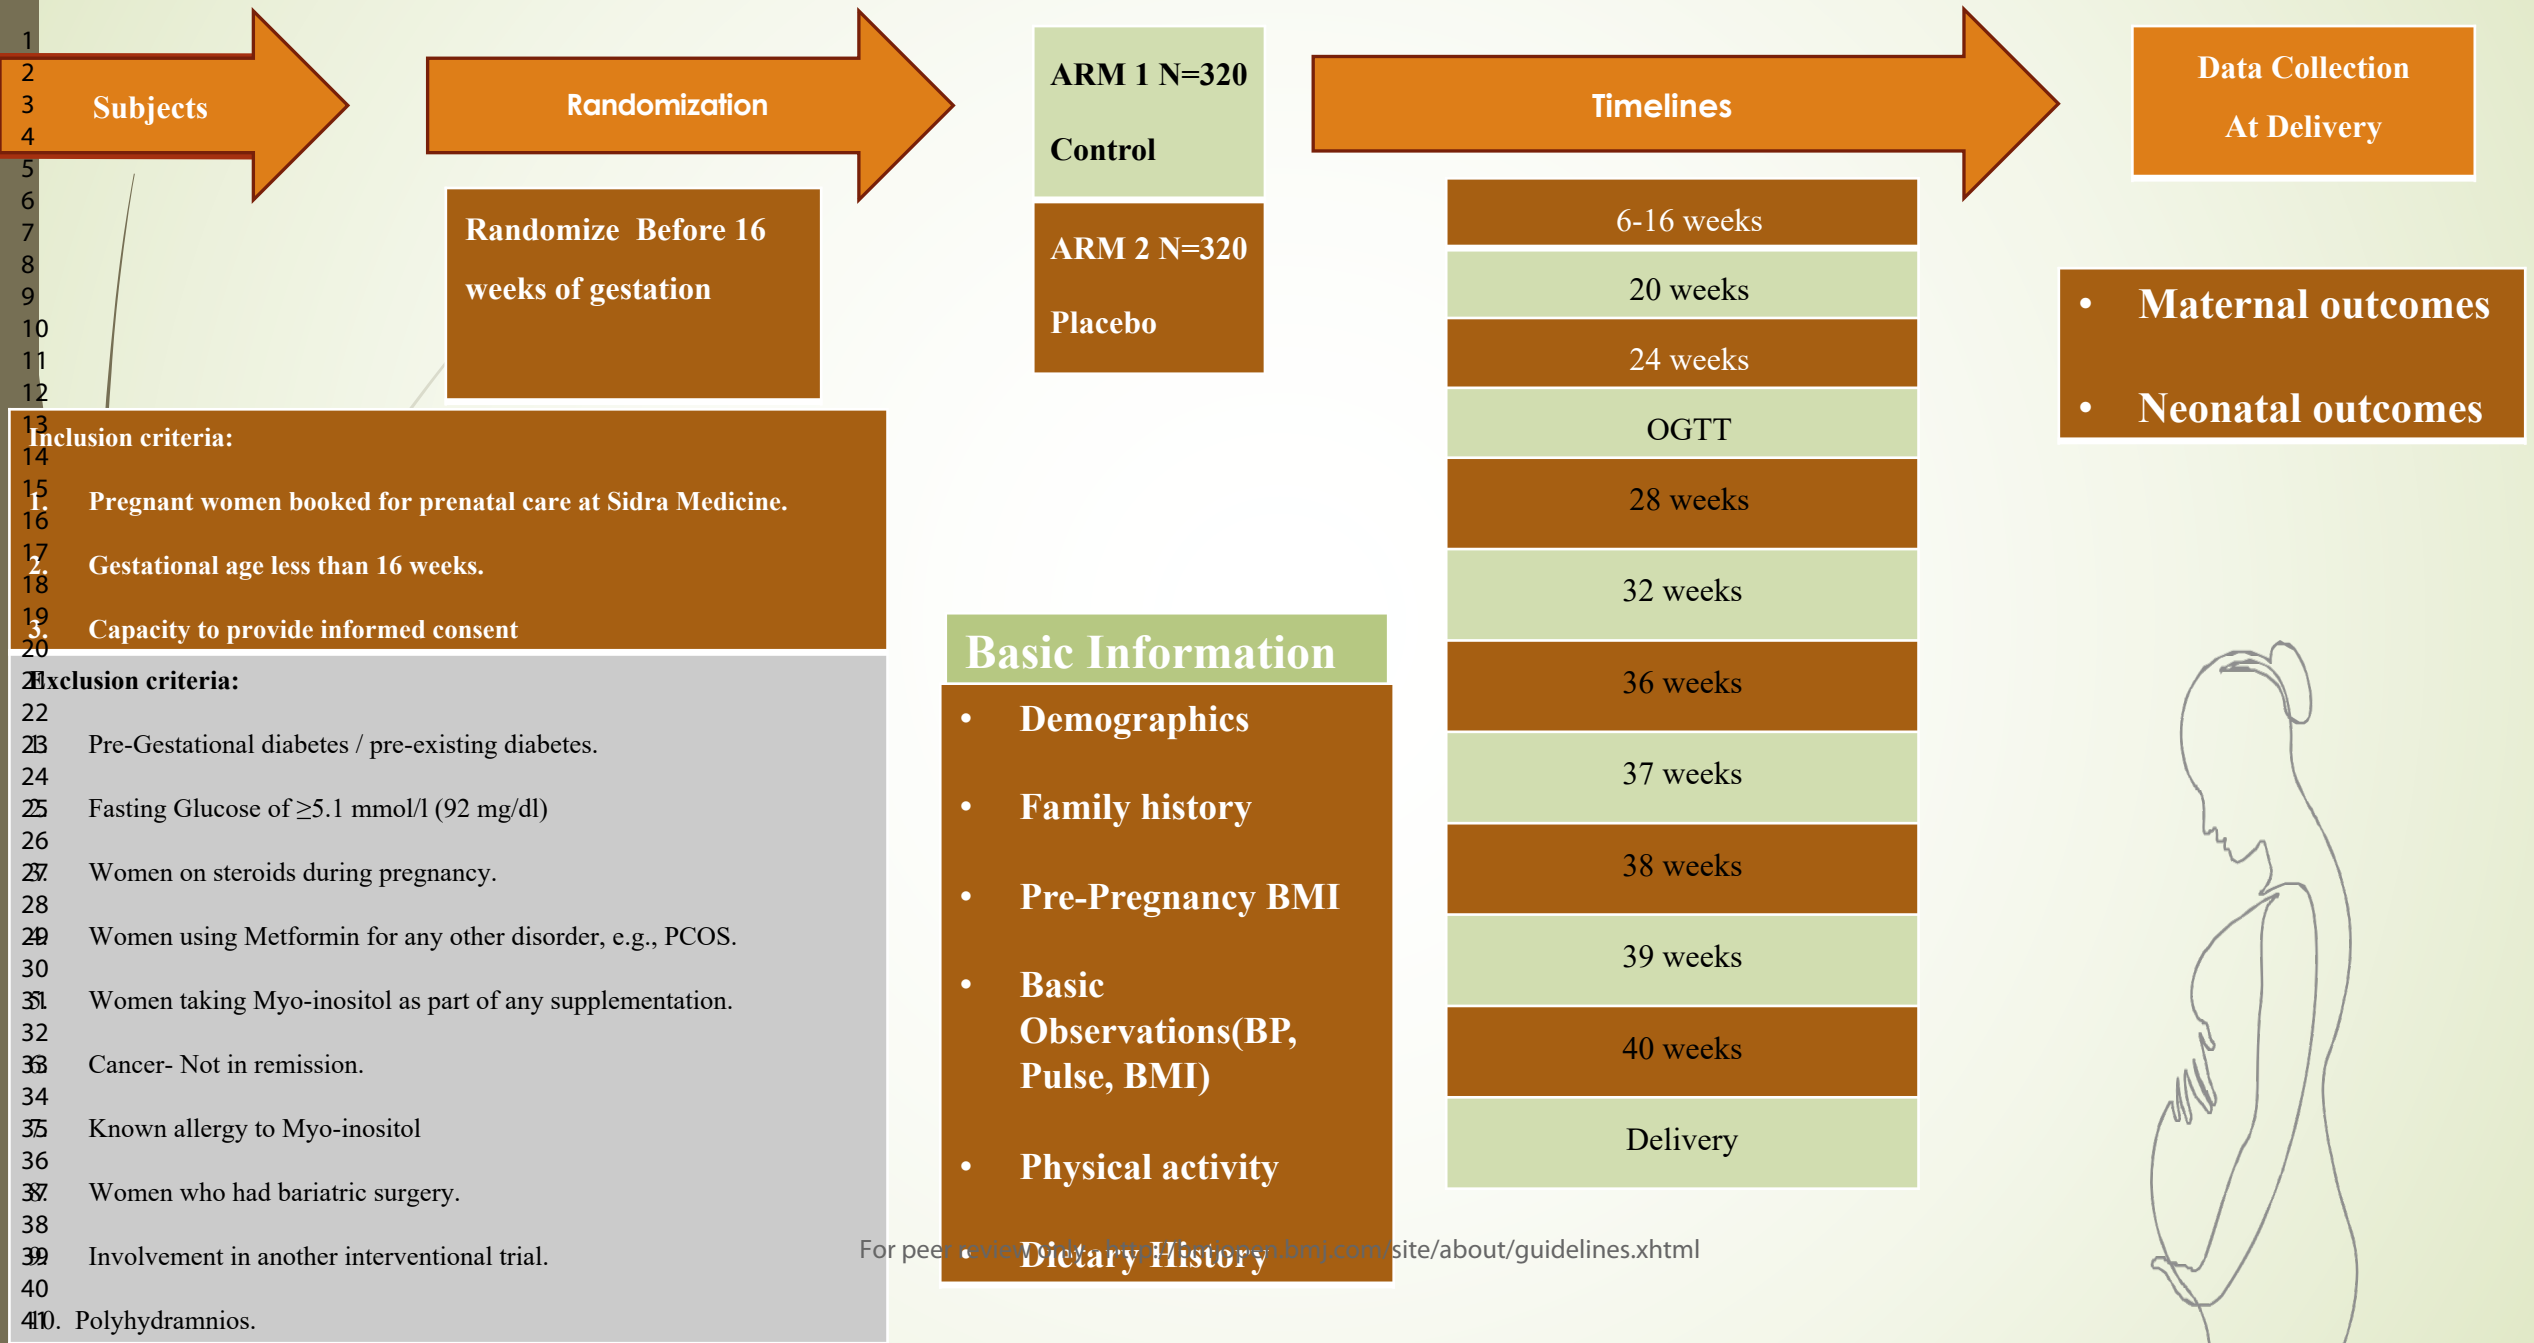

Subjects

Randomization

Randomize Before 16 weeks of gestation

ARM 1 N=320

Control

ARM 2 N=320

Placebo

Timelines

Data Collection At Delivery

- Maternal outcomes
- Neonatal outcomes

**Inclusion criteria:**

1. Pregnant women booked for prenatal care at Sidra Medicine.
2. Gestational age less than 16 weeks.
3. Capacity to provide informed consent

**Exclusion criteria:**

1. Pre-Gestational diabetes / pre-existing diabetes.
2. Fasting Glucose of  $\geq 5.1$  mmol/l (92 mg/dl)
3. Women on steroids during pregnancy.
4. Women using Metformin for any other disorder, e.g., PCOS.
5. Women taking Myo-inositol as part of any supplementation.
6. Cancer- Not in remission.
7. Known allergy to Myo-inositol
8. Women who had bariatric surgery.
9. Involvement in another interventional trial.
10. Polyhydramnios.

## Basic Information

- Demographics
- Family history
- Pre-Pregnancy BMI
- Basic Observations(BP, Pulse, BMI)
- Physical activity
- Dietary History

|            |
|------------|
| 6-16 weeks |
| 20 weeks   |
| 24 weeks   |
| OGTT       |
| 28 weeks   |
| 32 weeks   |
| 36 weeks   |
| 37 weeks   |
| 38 weeks   |
| 39 weeks   |
| 40 weeks   |
| Delivery   |

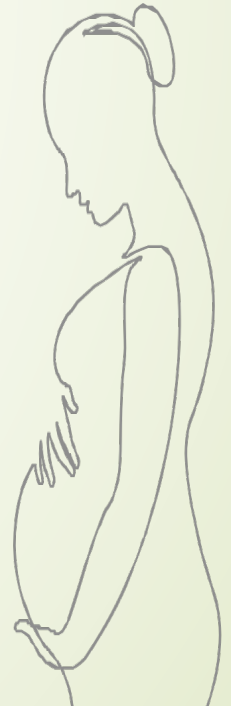

Table 1. MiGDM Study Overview

| Time point                 | 6-16 wks | 20 wks | 24 wks | 28 wks | 32 wks | 36 wks | 37 wks | 38 wks | 39 wks | 40 wks | Delivery |
|----------------------------|----------|--------|--------|--------|--------|--------|--------|--------|--------|--------|----------|
| <b>Measurement</b>         |          |        |        |        |        |        |        |        |        |        |          |
| Demographics               | X        |        |        |        |        |        |        |        |        |        |          |
| Family history             | X        |        |        |        |        |        |        |        |        |        |          |
| Pre-Pregnancy BMI          | X        |        |        |        |        |        |        |        |        |        |          |
| BP and HR                  | X        | X      | XX     | X      | X      | X      | X      | X      | X      | X      | X        |
| Physical activity          | X        |        |        |        |        |        |        |        |        |        |          |
| Maternal outcomes          |          |        |        |        |        |        |        |        |        |        | X        |
| Neonatal outcomes          |          |        |        |        |        |        |        |        |        |        | X        |
| C-peptide<br>Insulin, OGTT |          |        | X      | X      |        |        |        |        |        |        |          |
| Routine clinic tests       | X        |        |        |        |        |        |        |        |        |        |          |
| Ultrasound scan            |          | X      |        | X      | X      | X      |        |        |        |        |          |

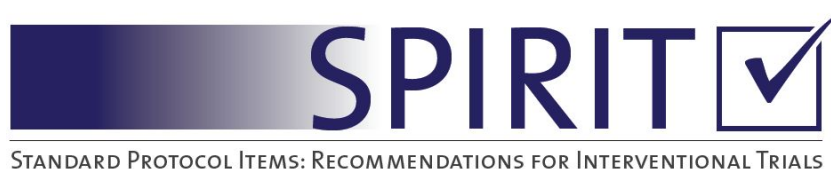

STANDARD PROTOCOL ITEMS: RECOMMENDATIONS FOR INTERVENTIONAL TRIALS

SPIRIT 2013 Checklist: Recommended items to address in a clinical trial protocol and related documents\*

| Section/item                      | Item No | Description                                                                                                                                                                                                                                                                                             |
|-----------------------------------|---------|---------------------------------------------------------------------------------------------------------------------------------------------------------------------------------------------------------------------------------------------------------------------------------------------------------|
| <b>Administrative information</b> |         |                                                                                                                                                                                                                                                                                                         |
| Title                             | 1       | Descriptive title identifying the study design, population, interventions, and, if applicable, trial acronym <b>Page 1</b>                                                                                                                                                                              |
| Trial registration                | 2a      | Trial identifier and registry name. If not yet registered, name of intended registry , <b>Trial registration section</b>                                                                                                                                                                                |
|                                   | 2b      | All items from the World Health Organization Trial Registration Data Set <b>Not applicable</b>                                                                                                                                                                                                          |
| Protocol version                  | 3       | Date and version identifier <b>Not applicable</b>                                                                                                                                                                                                                                                       |
| Funding                           | 4       | Sources and types of financial, material, and other support <b>Funding</b>                                                                                                                                                                                                                              |
| Roles and responsibilities        | 5a      | Names, affiliations, and roles of protocol contributors , <b>Authors , Authors affiliation and Authors contributions</b>                                                                                                                                                                                |
|                                   | 5b      | Name and contact information for the trial sponsor <b>Funding</b>                                                                                                                                                                                                                                       |
|                                   | 5c      | Role of study sponsor and funders, if any, in study design; collection, management, analysis, and interpretation of data; writing of the report; and the decision to submit the report for publication, including whether they will have ultimate authority over any of these activities <b>Funding</b> |
|                                   | 5d      | Composition, roles, and responsibilities of the coordinating centre, steering committee, endpoint adjudication committee, data management team, and other individuals or groups overseeing the trial, if applicable (see Item 21a for data monitoring committee) <b>Not applicable</b>                  |
| <b>Introduction</b>               |         |                                                                                                                                                                                                                                                                                                         |
| Background and rationale          | 6a      | Description of research question and justification for undertaking the trial, including summary of relevant studies (published and unpublished) examining benefits and harms for each intervention <b>Background and introduction</b>                                                                   |
|                                   | 6b      | Explanation for choice of comparators <b>Background and Introduction</b>                                                                                                                                                                                                                                |
| Objectives                        | 7       | Specific objectives or hypotheses <b>Aim and Hypothesis</b>                                                                                                                                                                                                                                             |



|    |                                                           |     |                                                                                                                                                                                                                                                                                                                                                                                                         |
|----|-----------------------------------------------------------|-----|---------------------------------------------------------------------------------------------------------------------------------------------------------------------------------------------------------------------------------------------------------------------------------------------------------------------------------------------------------------------------------------------------------|
| 1  |                                                           |     |                                                                                                                                                                                                                                                                                                                                                                                                         |
| 2  | Trial design                                              | 8   | Description of trial design including type of trial (eg, parallel group, crossover, factorial, single group), allocation ratio, and framework (eg, superiority, equivalence, noninferiority, exploratory) <b>Method/Design</b>                                                                                                                                                                          |
| 3  |                                                           |     |                                                                                                                                                                                                                                                                                                                                                                                                         |
| 4  |                                                           |     |                                                                                                                                                                                                                                                                                                                                                                                                         |
| 5  |                                                           |     |                                                                                                                                                                                                                                                                                                                                                                                                         |
| 6  |                                                           |     |                                                                                                                                                                                                                                                                                                                                                                                                         |
| 7  |                                                           |     |                                                                                                                                                                                                                                                                                                                                                                                                         |
| 8  | <b>Methods: Participants, interventions, and outcomes</b> |     |                                                                                                                                                                                                                                                                                                                                                                                                         |
| 9  |                                                           |     |                                                                                                                                                                                                                                                                                                                                                                                                         |
| 10 | Study setting                                             | 9   | Description of study settings (eg, community clinic, academic hospital) and list of countries where data will be collected. Reference to where list of study sites can be obtained <b>Method/Design</b>                                                                                                                                                                                                 |
| 11 |                                                           |     |                                                                                                                                                                                                                                                                                                                                                                                                         |
| 12 |                                                           |     |                                                                                                                                                                                                                                                                                                                                                                                                         |
| 13 |                                                           |     |                                                                                                                                                                                                                                                                                                                                                                                                         |
| 14 | Eligibility criteria                                      | 10  | Inclusion and exclusion criteria for participants. If applicable, eligibility criteria for study centres and individuals who will perform the interventions (eg, surgeons, psychotherapists) <b>Inclusion and exclusion criteria</b>                                                                                                                                                                    |
| 15 |                                                           |     |                                                                                                                                                                                                                                                                                                                                                                                                         |
| 16 |                                                           |     |                                                                                                                                                                                                                                                                                                                                                                                                         |
| 17 |                                                           |     |                                                                                                                                                                                                                                                                                                                                                                                                         |
| 18 |                                                           |     |                                                                                                                                                                                                                                                                                                                                                                                                         |
| 19 |                                                           |     |                                                                                                                                                                                                                                                                                                                                                                                                         |
| 20 | Interventions                                             | 11a | Interventions for each group with sufficient detail to allow replication, including how and when they will be administered <b>Randomization and Study schedule</b>                                                                                                                                                                                                                                      |
| 21 |                                                           |     |                                                                                                                                                                                                                                                                                                                                                                                                         |
| 22 |                                                           |     |                                                                                                                                                                                                                                                                                                                                                                                                         |
| 23 |                                                           |     |                                                                                                                                                                                                                                                                                                                                                                                                         |
| 24 |                                                           |     |                                                                                                                                                                                                                                                                                                                                                                                                         |
| 25 |                                                           | 11b | Criteria for discontinuing or modifying allocated interventions for a given trial participant (eg, drug dose change in response to harms, participant request, or improving/worsening disease) , <b>Randomization and Study schedule</b>                                                                                                                                                                |
| 26 |                                                           |     |                                                                                                                                                                                                                                                                                                                                                                                                         |
| 27 |                                                           |     |                                                                                                                                                                                                                                                                                                                                                                                                         |
| 28 |                                                           |     |                                                                                                                                                                                                                                                                                                                                                                                                         |
| 29 |                                                           |     |                                                                                                                                                                                                                                                                                                                                                                                                         |
| 30 |                                                           | 11c | Strategies to improve adherence to intervention protocols, and any procedures for monitoring adherence (eg, drug tablet return, laboratory tests) , <b>Randomization and Study schedule</b>                                                                                                                                                                                                             |
| 31 |                                                           |     |                                                                                                                                                                                                                                                                                                                                                                                                         |
| 32 |                                                           |     |                                                                                                                                                                                                                                                                                                                                                                                                         |
| 33 |                                                           |     |                                                                                                                                                                                                                                                                                                                                                                                                         |
| 34 |                                                           |     |                                                                                                                                                                                                                                                                                                                                                                                                         |
| 35 |                                                           | 11d | Relevant concomitant care and interventions that are permitted or prohibited during the trial <b>Randomization and Study schedule</b>                                                                                                                                                                                                                                                                   |
| 36 |                                                           |     |                                                                                                                                                                                                                                                                                                                                                                                                         |
| 37 |                                                           |     |                                                                                                                                                                                                                                                                                                                                                                                                         |
| 38 | Outcomes                                                  | 12  | Primary, secondary, and other outcomes, including the specific measurement variable (eg, systolic blood pressure), analysis metric (eg, change from baseline, final value, time to event), method of aggregation (eg, median, proportion), and time point for each outcome. Explanation of the clinical relevance of chosen efficacy and harm outcomes is strongly recommended <b>Outcomes measures</b> |
| 39 |                                                           |     |                                                                                                                                                                                                                                                                                                                                                                                                         |
| 40 |                                                           |     |                                                                                                                                                                                                                                                                                                                                                                                                         |
| 41 |                                                           |     |                                                                                                                                                                                                                                                                                                                                                                                                         |
| 42 |                                                           |     |                                                                                                                                                                                                                                                                                                                                                                                                         |
| 43 |                                                           |     |                                                                                                                                                                                                                                                                                                                                                                                                         |
| 44 |                                                           |     |                                                                                                                                                                                                                                                                                                                                                                                                         |
| 45 |                                                           |     |                                                                                                                                                                                                                                                                                                                                                                                                         |
| 46 | Participant timeline                                      | 13  | Time schedule of enrolment, interventions (including any run-ins and washouts), assessments, and visits for participants. A schematic diagram is highly recommended (see Figure) <b>Attachment: Table 1. MiGDM Study Overview , and Diagram 1; study overview</b>                                                                                                                                       |
| 47 |                                                           |     |                                                                                                                                                                                                                                                                                                                                                                                                         |
| 48 |                                                           |     |                                                                                                                                                                                                                                                                                                                                                                                                         |
| 49 |                                                           |     |                                                                                                                                                                                                                                                                                                                                                                                                         |
| 50 |                                                           |     |                                                                                                                                                                                                                                                                                                                                                                                                         |
| 51 |                                                           |     |                                                                                                                                                                                                                                                                                                                                                                                                         |
| 52 | Sample size                                               | 14  | Estimated number of participants needed to achieve study objectives and how it was determined, including clinical and statistical assumptions supporting any sample size calculations <b>Sample size and Statistical Analysis</b>                                                                                                                                                                       |
| 53 |                                                           |     |                                                                                                                                                                                                                                                                                                                                                                                                         |
| 54 |                                                           |     |                                                                                                                                                                                                                                                                                                                                                                                                         |
| 55 |                                                           |     |                                                                                                                                                                                                                                                                                                                                                                                                         |
| 56 |                                                           |     |                                                                                                                                                                                                                                                                                                                                                                                                         |
| 57 | Recruitment                                               | 15  | Strategies for achieving adequate participant enrolment to reach target sample size <b>Study plan</b>                                                                                                                                                                                                                                                                                                   |
| 58 |                                                           |     |                                                                                                                                                                                                                                                                                                                                                                                                         |
| 59 |                                                           |     |                                                                                                                                                                                                                                                                                                                                                                                                         |
| 60 |                                                           |     |                                                                                                                                                                                                                                                                                                                                                                                                         |

## Methods: Assignment of interventions (for controlled trials)

### Allocation:

|                                  |     |                                                                                                                                                                                                                                                                                                                                                                                                    |
|----------------------------------|-----|----------------------------------------------------------------------------------------------------------------------------------------------------------------------------------------------------------------------------------------------------------------------------------------------------------------------------------------------------------------------------------------------------|
| Sequence generation              | 16a | Method of generating the allocation sequence (eg, computer-generated random numbers), and list of any factors for stratification. To reduce predictability of a random sequence, details of any planned restriction (eg, blocking) should be provided in a separate document that is unavailable to those who enrol participants or assign interventions ) <b>Randomization and Study schedule</b> |
| Allocation concealment mechanism | 16b | Mechanism of implementing the allocation sequence (eg, central telephone; sequentially numbered, opaque, sealed envelopes), describing any steps to conceal the sequence until interventions are assigned <b>Randomization and Study schedule</b>                                                                                                                                                  |
| Implementation                   | 16c | Who will generate the allocation sequence, who will enrol participants, and who will assign participants to interventions <b>Randomization and Study schedule</b>                                                                                                                                                                                                                                  |
| Blinding (masking)               | 17a | Who will be blinded after assignment to interventions (eg, trial participants, care providers, outcome assessors, data analysts), and how <b>Randomization and Study schedule</b>                                                                                                                                                                                                                  |
|                                  | 17b | If blinded, circumstances under which unblinding is permissible, and procedure for revealing a participant's allocated intervention during the trial <b>Randomization and Study schedule</b>                                                                                                                                                                                                       |

## Methods: Data collection, management, and analysis

|                         |     |                                                                                                                                                                                                                                                                                                                                                                                                                                                   |
|-------------------------|-----|---------------------------------------------------------------------------------------------------------------------------------------------------------------------------------------------------------------------------------------------------------------------------------------------------------------------------------------------------------------------------------------------------------------------------------------------------|
| Data collection methods | 18a | Plans for assessment and collection of outcome, baseline, and other trial data, including any related processes to promote data quality (eg, duplicate measurements, training of assessors) and a description of study instruments (eg, questionnaires, laboratory tests) along with their reliability and validity, if known. Reference to where data collection forms can be found, if not in the protocol <b>Table 1. MiGDM Study Overview</b> |
|                         | 18b | Plans to promote participant retention and complete follow-up, including list of any outcome data to be collected for participants who discontinue or deviate from intervention protocols <b>Page 11 second paragraph</b>                                                                                                                                                                                                                         |
| Data management         | 19  | Plans for data entry, coding, security, and storage, including any related processes to promote data quality (eg, double data entry; range checks for data values). Reference to where details of data management procedures can be found, if not in the protocol <b>Informed consent ; Confidentiality section 16</b>                                                                                                                            |
| Statistical methods     | 20a | Statistical methods for analysing primary and secondary outcomes. Reference to where other details of the statistical analysis plan can be found, if not in the protocol <b>Sample size and Statistical Analysis</b>                                                                                                                                                                                                                              |

- 1  
2  
3  
4  
5  
6  
7  
8  
9
- 20b Methods for any additional analyses (eg, subgroup and adjusted analyses) [Sample size and Statistical Analysis](#)
- 20c Definition of analysis population relating to protocol non-adherence (eg, as randomised analysis), and any statistical methods to handle missing data (eg, multiple imputation) [Randomization and Study schedule](#) , [Sample size and Statistical Analysis](#)

## 10 **Methods: Monitoring**

- 11  
12  
13  
14  
15  
16  
17  
18  
19  
20  
21  
22  
23  
24  
25  
26  
27  
28  
29  
30  
31  
32  
33  
34  
35  
36
- Data monitoring 21a Composition of data monitoring committee (DMC); summary of its role and reporting structure; statement of whether it is independent from the sponsor and competing interests; and reference to where further details about its charter can be found, if not in the protocol. Alternatively, an explanation of why a DMC is not needed [Data monitoring](#)
- 21b Description of any interim analyses and stopping guidelines, including who will have access to these interim results and make the final decision to terminate the trial [Data monitoring](#)
- Harms 22 Plans for collecting, assessing, reporting, and managing solicited and spontaneously reported adverse events and other unintended effects of trial interventions or trial conduct [IRB Research proposal under section Safety reporting:](#)
- Auditing 23 Frequency and procedures for auditing trial conduct, if any, and whether the process will be independent from investigators and the sponsor [IRB Research proposal under section Quality assurance and Reporting](#)

## 37 **Ethics and dissemination**

- 38  
39  
40  
41  
42  
43  
44  
45  
46  
47  
48  
49  
50  
51  
52  
53  
54  
55  
56  
57  
58  
59  
60
- Research ethics 24 Plans for seeking research ethics committee/institutional review board approval [\(REC/IRB\) approval Page 13, Ethics approval](#)
- Protocol amendments 25 Plans for communicating important protocol modifications (eg, changes to eligibility criteria, outcomes, analyses) to relevant parties (eg, investigators, REC/IRBs, trial participants, trial registries, journals, regulators) [IRB Research proposal under section Reporting:](#)
- Consent or assent 26a Who will obtain informed consent or assent from potential trial participants or authorised surrogates, and how (see Item 32) [Page 9, Study plan first paragraph](#)
- 26b Additional consent provisions for collection and use of participant data and biological specimens in ancillary studies, if applicable [Consent form section 23,24,25](#)
- Confidentiality 27 How personal information about potential and enrolled participants will be collected, shared, and maintained in order to protect confidentiality before, during, and after the trial [Consent form section 16](#)

|    |                   |     |                                                                                         |
|----|-------------------|-----|-----------------------------------------------------------------------------------------|
| 1  |                   |     |                                                                                         |
| 2  | Declaration of    | 28  | Financial and other competing interests for principal investigators for                 |
| 3  | interests         |     | the overall trial and each study site <a href="#">Page 13 and 14 Declarations and</a>   |
| 4  |                   |     | <a href="#">Competing interests</a> :                                                   |
| 5  |                   |     |                                                                                         |
| 6  | Access to data    | 29  | Statement of who will have access to the final trial dataset, and                       |
| 7  |                   |     | disclosure of contractual agreements that limit such access for                         |
| 8  |                   |     | investigators <a href="#">Consent form section 16 confidentiality</a>                   |
| 9  |                   |     |                                                                                         |
| 10 | Ancillary and     | 30  | Provisions, if any, for ancillary and post-trial care, and for                          |
| 11 | post-trial care   |     | compensation to those who suffer harm from trial participation                          |
| 12 |                   |     | <a href="#">Consent form section 14, 15</a>                                             |
| 13 |                   |     |                                                                                         |
| 14 |                   |     |                                                                                         |
| 15 | Dissemination     | 31a | Plans for investigators and sponsor to communicate trial results to                     |
| 16 | policy            |     | participants, healthcare professionals, the public, and other relevant                  |
| 17 |                   |     | groups (eg, via publication, reporting in results databases, or other                   |
| 18 |                   |     | data sharing arrangements), including any publication restrictions                      |
| 19 |                   |     | <a href="#">Page 14 Publication and dissemination plan</a>                              |
| 20 |                   |     |                                                                                         |
| 21 |                   |     |                                                                                         |
| 22 |                   |     |                                                                                         |
| 23 |                   |     |                                                                                         |
| 24 |                   |     |                                                                                         |
| 25 |                   |     |                                                                                         |
| 26 |                   |     |                                                                                         |
| 27 |                   | 31b | Authorship eligibility guidelines and any intended use of professional                  |
| 28 |                   |     | writers <a href="#">Page 14 Authors' contributions</a>                                  |
| 29 |                   |     |                                                                                         |
| 30 |                   | 31c | Plans, if any, for granting public access to the full protocol, participant-            |
| 31 |                   |     | level dataset, and statistical code <a href="#">Not applicable</a>                      |
| 32 |                   |     |                                                                                         |
| 33 |                   |     |                                                                                         |
| 34 | <b>Appendices</b> |     |                                                                                         |
| 35 |                   |     |                                                                                         |
| 36 | Informed consent  | 32  | Model consent form and other related documentation given to                             |
| 37 | materials         |     | participants and authorised surrogates <a href="#">IRB 400 Informed consent</a>         |
| 38 |                   |     | <a href="#">form attached</a>                                                           |
| 39 |                   |     |                                                                                         |
| 40 | Biological        | 33  | Plans for collection, laboratory evaluation, and storage of biological                  |
| 41 | specimens         |     | specimens for genetic or molecular analysis in the current trial and for                |
| 42 |                   |     | future use in ancillary studies, if applicable <a href="#">Relevant information are</a> |
| 43 |                   |     | <a href="#">included in IRB 400 Informed consent form</a>                               |
| 44 |                   |     |                                                                                         |

\*It is strongly recommended that this checklist be read in conjunction with the SPIRIT 2013 Explanation & Elaboration for important clarification on the items. Amendments to the protocol should be tracked and dated. The SPIRIT checklist is copyrighted by the SPIRIT Group under the Creative Commons "[Attribution-NonCommercial-NoDerivs 3.0 Unported](#)" license.

# BMJ Open

**The effect of antenatal dietary Myo-inositol supplementation on the incidence of Gestational Diabetes Mellitus and fetal outcome: Protocol for a double blind randomized controlled trial.**

|                                 |                                                                                                                                                                                                         |
|---------------------------------|---------------------------------------------------------------------------------------------------------------------------------------------------------------------------------------------------------|
| Journal:                        | <i>BMJ Open</i>                                                                                                                                                                                         |
| Manuscript ID                   | bmjopen-2021-055314.R2                                                                                                                                                                                  |
| Article Type:                   | Protocol                                                                                                                                                                                                |
| Date Submitted by the Author:   | 10-Dec-2021                                                                                                                                                                                             |
| Complete List of Authors:       | Ibrahim, Ibrahim; Sidra Medicine, Abdullahi, Hala; Sidra Medicine Fagier, Yassin; Sidra Medicine Ortashi, Osman; Sidra Medicine Terrangera, Annalisa; Sidra Medicine Okunoye, Gbemisola; Sidra Medicine |
| <b>Primary Subject Heading</b>: | Diabetes and endocrinology                                                                                                                                                                              |
| Secondary Subject Heading:      | Obstetrics and gynaecology                                                                                                                                                                              |
| Keywords:                       | Diabetes in pregnancy < DIABETES & ENDOCRINOLOGY, Maternal medicine < OBSTETRICS, NUTRITION & DIETETICS                                                                                                 |
|                                 |                                                                                                                                                                                                         |

SCHOLARONE™  
Manuscripts

**Title Page****Title of Study:**

The effect of antenatal dietary Myo-inositol supplementation on the incidence of Gestational Diabetes Mellitus and fetal outcome: Protocol for a double-blind randomized controlled trial.

**Authors:**

1. Ibrahim Ibrahim<sup>1,2</sup>
2. Hala Abdullahi<sup>2,3</sup>
3. Yassin Fagier<sup>2,3</sup>
4. Osman Ortashi<sup>2,3</sup>
5. Annalisa Terranegra<sup>4</sup>
6. Gbemisola Okunoye<sup>2,3,5</sup>

**Authors email:**

1. [ibrahim2002@doctors.org.uk](mailto:ibrahim2002@doctors.org.uk)
2. [habdullahi@sidra.org](mailto:habdullahi@sidra.org)
3. [Yfagier@sidra.org](mailto:Yfagier@sidra.org)
4. [oortashi@sidra.org](mailto:oortashi@sidra.org)
5. [aterranegra@sidra.org](mailto:aterranegra@sidra.org)
6. [gokunoye@sidra.org](mailto:gokunoye@sidra.org)

**Authors Affiliation:**

1. Senior Attending Physician, Endocrinology, Sidra Medicine, Doha, Qatar
2. Assistant Professor, Weill Cornell Medicine-Qatar, Doha, Qatar
3. Senior Attending Physician, Obstetrics and Gynecology, Sidra Medicine, Doha, Qatar
4. Head of Laboratory of Precision Nutrition, Mother and Child Health Department, Research branch, Sidra Medicine, Doha, Qatar
5. Division Chief of Obstetrics(Acting), Sidra Medicine, Doha, Qatar

**Corresponding Author:**

Ibrahim Ibrahim

Sidra Medicine, Education City, Doha, Qatar

Email: [ibrahim2002@doctors.org.uk](mailto:ibrahim2002@doctors.org.uk)

## ABSTRACT

**Introduction:** Gestational Diabetes Mellitus (GDM) affects 23.6% of Qatari women and is associated with maternal and perinatal morbidity and long-term risk of developing type 2 diabetes (T2DM). A number of challenges exist with current interventions, including non-compliance with dietary advice, the reluctance of mothers to ingest Metformin tablets or use Insulin injections. These challenges highlight the importance of pursuing evidence-based prevention strategies. Myo-inositol is readily available as an FDA-approved food supplement with emerging but limited evidence suggesting it may be beneficial in reducing the incidence of GDM. Further studies, such as this one, from different ethnic contexts and with differing risk factors, are urgently needed to assess Myo-inositol effects on maternal and neonatal outcomes.

**Methods and analysis:** This study is a prospective, randomized, double-blinded, placebo controlled clinical trial to either Myo-inositol supplementation or placebo.

We plan to enrol 640 pregnant women attending antenatal care at Sidra Medicine, Doha, Qatar, 320 in each arm. All participants will complete at least 12 weeks of supplementation prior to undertaking the OGTT at 24-28 weeks. The daily use of the trial supplementation will continue until the end of pregnancy. All outcome measures will be collected from the electronic medical records.

**Ethics and dissemination:** Ethical approval for the study was obtained on 12/04/2021 from Sidra Medicine (IRB number 1538656). Results of the primary trial outcome and secondary endpoints will be submitted for publication in a peer-reviewed journal.

1  
2  
3 **Trial Registration:** Prospectively registered on 26/05/2021. Registration number  
4  
5  
6 ISRCTN16448440 (ISRCTN registry).  
7

8  
9 **Article Summary:**

10  
11  
12 **Strengths and limitations of this study**  
13

- 14  
15 • To our knowledge, this is the first large RCT in an ethnic population with a high  
16 prevalence of GDM to test the effectiveness of Myo-inositol supplementation.  
17  
18 • The early screening of diabetes in pregnancy used in Qatar ensures that women with  
19 pre-existing diabetes are excluded before enrolment.  
20  
21 • The duration of Myo-inositol supplementation prior to OGTT is variable, between 12  
22 and 20 weeks and this is a potential limitation of the study.  
23  
24 • The study may not have enough power to address some of the secondary outcome  
25 measures.  
26  
27  
28  
29  
30  
31  
32  
33  
34  
35  
36  
37

38 **Keywords:**

39  
40 Gestational Diabetes, Pregnancy, Myo-inositol, perinatal morbidity, Dietary  
41 supplementation  
42  
43  
44  
45  
46  
47  
48  
49  
50  
51  
52  
53  
54  
55  
56  
57  
58  
59  
60



## INTRODUCTION

Gestational diabetes mellitus (GDM) is defined as any degree of glucose intolerance with onset or first recognition during pregnancy (1). Identified risk factors for GDM include maternal age, maternal body mass index (BMI), ethnic background, family history, and previous history of GDM (1). Globally, the International Diabetes Federation (IDF) estimates that 14% of all deliveries are affected by GDM (2). Diabetes is a significant public health issue in Qatar with increasing prevalence over the years. A recent study from Qatar showed that the prevalence of GDM among Qatari women was 23.6% (3). GDM is a major pregnancy complication associated with both maternal and perinatal morbidity and long-term risk of the development of type 2 diabetes (T2DM). The Hyperglycemia and Adverse Pregnancy Outcomes (HAPO) study, a multi-centric, observational study, evaluated the relationship between maternal hyperglycemia and adverse pregnancy outcomes and identified elevated maternal serum glucose level during pregnancy as a major risk factor for adverse pregnancy outcomes, increasing rates of large-for-gestational-age infants, fetal hyperinsulinemia, neonatal hypoglycemia, and caesarean delivery (4). During pregnancy, GDM is associated with an increased risk of pre-eclampsia, preterm labor, Caesarean-section, macrosomia, shoulder dystocia, and a substantial increase in medical cost (5), (6). Exposure to hyperglycemia in pregnancy is shown to be associated with an increased risk to the offspring of abnormal glucose tolerance, Type 2 diabetes, obesity, and higher blood pressure (7), (8). In the last decade, multi-modal evidence-based measures and interventions have been introduced to improve the outcome of pregnancy in women with GDM. It has also been shown that both lifestyle modifications and Metformin therapy effectively delay or prevent diabetes in women with a history of GDM (9). Whilst significant progress has been made,

1  
2  
3 several challenges remain with current interventions, including non-compliance with dietary  
4 advice and mothers' reluctance to ingest Metformin tablets or use Insulin injections. These  
5 challenges highlight the importance of pursuing evidence-based prevention strategies.  
6  
7  
8  
9

10  
11 Inositol has been proposed as a food supplement that might reduce GDM incidence in high-  
12 risk pregnant women. Myo-inositol, an isomer of inositol, is a naturally occurring sugar  
13 commonly found in cereals, corn, legumes, and meat. The US Food and Drug Administration  
14 class it as a dietary supplement. It is one of the intracellular mediators of the insulin  
15 signaling pathway and correlated with insulin sensitivity in T2DM. It is an insulin-sensitizing  
16 mediator, which is reported to reduce plasma glucose levels in polycystic ovary syndrome  
17 (PCOS), where it has gained increasing attention and is used for its unique property of  
18 reducing insulin resistance. Inositol isoforms were reported to improve insulin sensitivity  
19 and ovulatory function in young women affected by PCOS (10). Chiro- and Myo-inositol are  
20 major components of the two inositol phosphoglycan mediators of insulin action. Patients  
21 with T2DM, compared to controls, have less active chiro-inositol-containing mediator  
22 fractions and a significantly reduced chiro-inositol to Myo-inositol ratio (11). Myo-  
23 inositol supplementation is shown in an RCT to reduce the incidence of GDM in pregnant  
24 women with a parent with type 2 diabetes (6 %vs. 15.3%,  $P = 0.04$ ) as well as the incidence  
25 of the delivery of a macrosomic fetus (12). The potential beneficial effect on improving  
26 insulin sensitivity suggests that it may be useful for preventing GDM. Although Myo-inositol  
27 shows promise in preventing GDM, there is not enough evidence at this stage to support its  
28 routine use. A more recent Cochrane Database Systematic Review looked at the antenatal  
29 dietary supplementation with Myo-inositol in women during pregnancy for preventing  
30 GDM, concluded that there is evidence from four trials of a potential benefit for reducing  
31 the incidence of GDM. However, there was no consensus on neonatal outcomes. The  
32  
33  
34  
35  
36  
37  
38  
39  
40  
41  
42  
43  
44  
45  
46  
47  
48  
49  
50  
51  
52  
53  
54  
55  
56  
57  
58  
59  
60

1  
2  
3 authors recommended further studies to include pregnant women of different ethnicities  
4  
5 and varying risk factors (13). Recent systematic reviews and meta-analyses have shown that  
6  
7 Myo-inositol supplementation is associated with a significantly reduced incidence of GDM  
8  
9 and preterm delivery (14) (15).  
10  
11

12  
13 Given the ready availability of Myo-inositol as a dietary supplement and its relatively low  
14  
15 cost compared to traditional interventions for preventing GDM, exploring its potential role  
16  
17 in reducing GDM is a much needed and timely study in a different socio-economic and  
18  
19 population context such as Qatar. Qatar's population is of multi-ethnic origin, including  
20  
21 Qataris and non-Qatari Arabs (residents of the Middle East and North Africa Region), Asian  
22  
23 (residents from the India sub-continent and the Philippines), and Caucasian expatriates. A  
24  
25 large RCT in this diverse population with high GDM risk will add to the available evidence of  
26  
27 the role of nutritional supplements to prevent GDM.  
28  
29  
30  
31  
32  
33  
34  
35  
36

## 37 **Methods/Design**

### 38 Aim and Hypothesis

39  
40  
41 This is a prospective, randomized, double blind, placebo controlled clinical trial to either  
42  
43 Myo-inositol supplementation or placebo. The study plans to enroll 640 pregnant women  
44  
45 attending antenatal care at Sidra Medicine, with 320 pregnant women in each arm. The  
46  
47 study overview is summarized in Supplementary Figure 1.  
48  
49  
50  
51

52  
53 The hypothesis for the study is that Myo-inositol in pregnancy reduces the risk of developing  
54  
55 Gestational Diabetes.  
56  
57  
58  
59  
60

1  
2  
3 Outcome Measures  
4  
5

6 Primary Outcome:  
7  
8

- 9 1. The incidence of Gestational Diabetes in both groups  
10  
11

12 Secondary outcomes:  
13  
14

15 Maternal:  
16  
17

- 18 1. Gestational weight gain.  
19  
20 2. Need for Metformin or insulin therapy.  
21  
22 3. Mode of delivery.  
23  
24 4. Hypertensive disorders of pregnancy  
25  
26  
27  
28

29 Fetal:  
30  
31

- 32 1. Large for Gestational Age at delivery (weight >95th centile for Gestation)  
33  
34 2. Small for Gestational Age at delivery (weight < 10th centile for Gestation)  
35  
36 3. Macrosomia (fetal weight  $\geq$  4000 g at delivery)  
37  
38 4. Shoulder dystocia and birth injury  
39  
40 5. Polyhydramnios.  
41  
42 6. NICU Admission for > 24 hours  
43  
44 7. Neonatal hypoglycaemia requiring intravenous glucose  
45  
46 8. Preterm delivery (<37 weeks gestation)  
47  
48 9. Transient Tachypnea of the newborn  
49  
50 10. Respiratory distress syndrome (RDS)  
51  
52  
53  
54  
55  
56  
57  
58  
59  
60

1  
2  
3 Gestation diabetes (GDM) diagnosis is based on WHO (IADPSG) , one or more abnormal  
4 glucose values; (fasting blood glucose  $\geq 5.1$  mmol/l; 1-hour post 75 grams OGTT  $\geq 10.0$   
5 mmol/ l; and 2-hours post 75 grams OGTT  $\geq 8.5$  mmol/l (16).  
6  
7  
8  
9

10  
11 Pre-pregnancy weight is recorded in the initial visit based on patient self-report and is  
12 entered into the electronic medical records. In the absence of a validated pre-pregnancy  
13 weight, the measured weight at first hospital visit will be used with appropriate adjustment  
14 for gestation at recruitment. We will use the last recorded weight at the time of delivery to  
15 calculate total gestational weight gain corrected for gestational age at delivery.  
16  
17  
18  
19  
20  
21  
22

23  
24 Macrosomia is defined as birth weight  $> 4000$  grams. LGA (Large for gestational age) is  
25 defined as birth weight  $>95^{\text{th}}$  percentile, and SGA (small for gestational age) is defined as  
26 birth weight  $<10^{\text{th}}$  percentile. The percentile for growth will be extracted from the built in  
27 growth charts (WHO birth to 24 months weight for age chart) within the Electronic medical  
28 records system. Preterm delivery is defined as delivery  $< 37$  weeks' Gestation.  
29  
30  
31  
32  
33  
34  
35

36  
37 Hypertensive disorders in pregnancy will be diagnosed based on the American College of  
38 Obstetrics and Gynaecology (17). Gestational hypertension is defined as a systolic blood  
39 pressure of 140 mm Hg or more or a diastolic blood pressure of 90 mm Hg or more, or both,  
40 on two occasions at least 4 hours apart after 20 weeks of gestation in a woman with a  
41 previously normal blood pressure. Women with gestational hypertension with severe range  
42 blood pressures (a systolic blood pressure of 160 mm Hg or higher, or diastolic blood  
43 pressure of 110 mm Hg or higher) are diagnosed with preeclampsia with severe features.  
44  
45  
46  
47  
48  
49  
50  
51  
52  
53  
54 Pre-eclampsia is any raised blood pressure as above with significant Proteinuria of 300 mg  
55 or more per 24 hour urine collection or protein/creatinine ratio of 0.3 mg/dL or more or  
56 urine dipstick reading of 2+ of protein (17).  
57  
58  
59  
60

1  
2  
3 Shoulder dystocia is the use of any additional manoeuvres for the delivery of the baby after  
4  
5 the delivery of the head, as documented by the delivering medical staff.  
6  
7

8  
9 The diagnosis of neonatal hypoglycemia and respiratory distress syndrome (RDS) will be  
10  
11 extracted from the diagnosis section of the neonatal electronic medical records.  
12  
13

14 Neonatal hypoglycemia will be diagnosed based on the Paediatric Endocrine Society and  
15  
16 British Association of Perinatal Medicine (BAPM) (18). If the blood glucose is less than 45  
17  
18 mg/dL (2.5mmol/L), Glucogel with a milk feed is to be given up to 3 times. If blood glucose  
19  
20 remains at 25 mg/dl (1.4 mmol/l) up to 2 times, then the neonate will be admitted to NICU  
21  
22 for Intravenous dextrose. In symptomatic patients with glucose < 45 mg/dl (2.5 mmol/l), the  
23  
24 neonate will be admitted to NICU for IV dextrose . We will only include neonatal  
25  
26 hypoglycemia requiring intravenous glucose for this study Respiratory distress syndrome  
27  
28 (RDS) is coded in accordance with -ICD-10-CM Diagnosis Code.  
29  
30  
31  
32  
33

### 34 Inclusion and Exclusion criteria 35

36  
37 All pregnant women booking for antenatal care at Sidra Medicine before 16 weeks of  
38  
39 gestation will be approached to participate in the study. Comprehensive written and verbal  
40  
41 information will be provided in both English and Arabic. This will ensure early  
42  
43 commencement of the study supplementation or placebo with a sufficient period prior to  
44  
45 undertaking the OGTT, thus optimizing any potential effect of the intervention.  
46  
47  
48  
49

50 The following are the inclusion and exclusion criteria for the study:  
51

#### 52 Inclusion criteria: 53

- 54 1. Pregnant women booked for prenatal care at Sidra Medicine.  
55
- 56 2. Gestational age less than 16 weeks.  
57  
58  
59  
60

3. Capacity to provide informed consent.

#### Exclusion criteria:

1. Pre-gestational diabetes/ pre-existing diabetes.
2. Fasting glucose of  $\geq 5.1$  mmol/l (92 mg/dl)
3. Women on steroids during pregnancy.
4. Women using Metformin for any other disorder, e.g., PCOS.
5. Women taking Myo-inositol as part of any supplementation.
6. Cancer- Not in remission.
7. Known allergy to Myo-inositol
8. Women who had bariatric surgery.
9. Involvement in another interventional trial.
10. Polyhydramnios.

#### Study participants

Women who agree to participate will be invited to attend the research clinic. They will be provided with detailed information about the study by the Principal Investigator or delegated Co-investigators, and, if agreeable, a written consent form will be obtained (supplementary file 1).

An acceptance rate of 50-60% is anticipated; hence, the target is to approach about 1000 women with a view to enrolling them in the study. The average obstetric antenatal booking patient rate is between 8 to 14 per day, and this translates into a projected average of 2860 patients annually, well above the recruitment target for this study. The study protocol is consistent with the principles of the Declaration of Helsinki (IRB number 1538656), and

1  
2  
3 participants will be required to provide written informed consent prior to trial enrollment.  
4

5  
6 The study overview is summarized in supplementary figure 1.  
7

#### 8 9 Randomization and Study schedule

10  
11 Randomization will be performed using computer-generated numbers, which would allocate  
12  
13 participants into either Myo-inositol or Placebo arms. Both Myo-inositol and Placebo will  
14  
15 have identical packaging prepared at the source and supplied through Sidra pharmacy. All  
16  
17 research team members and research participants will be blinded to the content of the  
18  
19 research packs. The pharmacist shall seal, randomly number the sachets according to the  
20  
21 computer-generated scheme, and be the sole healthcare provider to access this data until  
22  
23 blinding is broken. Breaking blinding is possible after delivery and in cases of adverse  
24  
25 reactions or if severe side effects are encountered.  
26  
27  
28  
29

30  
31  
32 The Myo-inositol pack will contain 2 g of Myo-inositol in the form of a sachet. The placebo  
33  
34 pack will contain a pharmacologically inert substrate in a similar packing to the Myo-inositol  
35  
36 sachets. Both Myo-inositol and Placebo sachets are to be taken twice a day. The pharmacist  
37  
38 will provide a monthly (30 days) supply of the trial packs. All participants will complete at  
39  
40 least 12 weeks of intervention or supplementation before undertaken OGTT. The Research  
41  
42 nurse, blinded to the research supplements, will arrange scheduled contacts with all  
43  
44 participants every month to arrange additional trial packs and check on compliance. These  
45  
46 scheduled contacts will be linked to the regular antenatal clinic schedules so that  
47  
48 participants do not have to make extra visits. All participants will have standard antenatal  
49  
50 care as per Sidra's prenatal care pathway.  
51  
52  
53  
54  
55

56  
57 Participants will be advised to stop study supplements only when admitted in spontaneous  
58  
59 labour, for Induction of Labour or Lower Segment Caesarean Section, whichever comes  
60



1  
2  
3 earlier. The remaining and unused sachets will be collected on admission for delivery to  
4  
5 evaluate patient compliance. The study schedule is summarised in the supplementary  
6  
7  
8 Table1.  
9

### 10 11 **Clinical assessment**

12  
13  
14 The Oral Glucose Tolerance Test (OGTT) will be performed at 24-28 weeks as per Sidra  
15  
16 protocol for routine screening for GDM, and additional blood samples for C-peptide and  
17  
18 Insulin will also be taken at the same time. All participants will complete at least 12 weeks of  
19  
20 intervention or supplementation prior to undertaking the OGTT. Women will be advised to  
21  
22 continue using the trial packs regardless of OGTT results. Those who are diagnosed as  
23  
24 having GDM will have standard antenatal care as per Sidra prenatal care pathway.  
25  
26  
27

28  
29 Data regarding pregnancy course and delivery outcome will be collected by the research  
30  
31 nurse. Lifestyle and dietary data will be collected at each visit by a dietician using 24hrs  
32  
33 dietary recall and questionnaires and correlated with the study outcomes (supplementary  
34  
35 file 2, 3 and 4)  
36  
37  
38

39  
40 Participants who withdraw from the study or who fail to return for follow-up assessments  
41  
42 shall continue to have data collected from their routine diabetic or obstetrics clinic visits  
43  
44 unless they specifically withdraw consent for this. Data collected during the trial will be  
45  
46 stored securely with appropriate data security governance in the hospital electronic system  
47  
48 for health records as a source document.  
49  
50

### 51 52 53 **Sample size and Statistical Analysis**

54  
55  
56 The overall prevalence of newly detected diabetes in pregnancy in Qatar is 23.6%. A sample  
57  
58 size of 640 pregnant women, with 320 in each arm, is sufficient to detect a clinically  
59  
60

1  
2  
3 significant reduction of 40% in the incidence of GDM between groups using a two-tailed z-  
4  
5 test of proportions between two groups with 80% power and a 95% level of confidence,  
6  
7  
8 accounting for 20% drop out rate. This 40% reduction represents a 23.6 % incidence of  
9  
10 newly detected diabetes in pregnancy in the placebo group and a maximum of 14.2% in the  
11  
12 Myo-inositol group. All randomized subjects will be included in the analysis.  
13  
14  
15

16 All statistical analyses will be applied using R and SAS v9.4 (SAS Institute). Statistical analyses  
17  
18 will include both descriptive (numerical and graphical) and inferential statistics. Graphical  
19  
20 analyses, where deemed appropriate, will be included in the analyses. Frequencies and  
21  
22 proportions will be used to summarize qualitative variables, whereas means, median,  
23  
24 standard deviation, and quartiles will be used to summarize quantitative variables. Two  
25  
26 sided Student's t-test and chi-squared test will be used to evaluate the differences between  
27  
28 continuous and categorical variables, respectively. Spearman's correlation coefficients will  
29  
30 be estimated to determine associations between quantitative variables. Logistic regression  
31  
32 analysis will be performed to estimate odds ratios (ORs) and to examine the predictive  
33  
34 effect of each factor. ORs and their 95% confidence intervals (95% CI) for associated factors  
35  
36 will be estimated, and all statistical assessments will be considered significant at P-value <  
37  
38 0.05. The statistical analyses are directed towards the assessment of the objectives of the  
39  
40  
41  
42  
43  
44  
45 study.  
46  
47  
48  
49  
50  
51  
52  
53  
54  
55  
56  
57  
58  
59  
60

## Data Monitoring Plan

The data-monitoring plan for this study includes the appointment of an independent expert to perform and oversee the interim analysis for the study. An interim analysis is planned at 12 months and or at 50% of enrolment, whichever comes earlier. If the interim analysis shows that the difference between the two arms reaches statistical significance, the result of the analysis and recommendation for stopping the trial will be communicated to the IRB.

## List of Abbreviations

GDM- Gestational Diabetes

FDA-Food and drugs administration

IDF-International Diabetes Federation

T2DM-Type 2 Diabetes Mellitus

PCOS-Polycystic Ovarian syndrome

OGTT-Oral Glucose Tolerance Test

NICU-Neonatal intensive care unit

RDS-Respiratory distress syndrome

## Declarations

Ethics approval and consent to participate: This study was approved by the Sidra Medicine IRB on 12<sup>th</sup> April 2021 with the approval reference number 1538656.

Consent for publication: Written informed consent will be obtained for publication

1  
2  
3 Publication and dissemination plan: Planned publication in a peer-reviewed journal.  
4  
5

6 All data generated or analyzed during this study will be included in the publication of the  
7  
8 subsequent results.  
9

10  
11 Competing interests: The authors declare that they have no competing interests.  
12  
13

14  
15 Provenance and peer review: Not commissioned; externally peer-reviewed.  
16  
17

18 Funding: The study is funded by Sidra Medicine through the competitive Internal Research  
19  
20 Grant fund, (grant number SDR200067), following the external peer review of the study. The  
21  
22 funding arm of Sidra Medicine is not involved in the design of the study, management,  
23  
24 analysis, interpretation of data; writing of the report; the decision to submit the report for  
25  
26 publication or writing of the protocol manuscript.  
27  
28

29  
30 Patient and public involvement: No patient involved in the study.  
31  
32  
33  
34  
35  
36

37 **Authors' contributions:**  
38

39  
40 HA initiated the idea for the study, II , GO and HA produced the initial study design, GO  
41  
42 prepared the draft manuscript. HA, II, OO, YF, AT, and GO contributed to the manuscript  
43  
44 review. All authors read and approved the final manuscript.  
45  
46  
47

48 Acknowledgments: Not applicable  
49  
50

51 Word count: 2580 words  
52  
53  
54  
55  
56  
57  
58  
59  
60

## References

1. Buchanan TA, Xiang AH. Gestational diabetes mellitus. *J Clin Invest* [Internet]. 2005 [cited 2018 Sep 28]; 115:485. Available from: <http://www.jci.org>
2. Cho NH, Shaw JE, Karuranga S, Huang Y, da Rocha Fernandes JD, Ohlrogge AW, et al. IDF Diabetes Atlas: Global estimates of diabetes prevalence for 2017 and projections for 2045. *Diabetes Res Clin Pract* [Internet]. 2018 Apr [cited 2018 Sep 28]; 138:271–81.  
Available from: <https://linkinghub.elsevier.com/retrieve/pii/S0168822718302031>
3. Bashir M, Abdel-Rahman ME, Aboufotouh M, Eltaher F, Omar K, Babarinsa I, et al. Prevalence of newly detected diabetes in pregnancy in Qatar, using universal screening. 2018 [cited 2018 Sep 28]; Available from: <https://doi.org/10.1371/journal.pone.0201247>
4. HAPO Group THSCR. Hyperglycemia and Adverse Pregnancy Outcomes. *N Engl J Med* [Internet]. 2008 May 8 [cited 2018 Sep 29]; 358(19):1991–2002.  
Available from: <http://www.nejm.org/doi/abs/10.1056/NEJMoa0707943>
5. Farrar D. Hyperglycemia in pregnancy : prevalence, impact, and management challenges. 2016; 519–27.
6. Dall TM, Yang W, Halder P, Pang B, Massoudi M, Wintfeld N, et al. The economic burden of elevated blood glucose levels in 2012: diagnosed and undiagnosed diabetes, gestational diabetes mellitus, and prediabetes. *Diabetes Care*. 2014 Dec; 37(12):3172–9.
7. Damm P, Houshmand-Oeregaard A, Kelstrup L, Lauenborg J, Mathiesen ER, Clausen TD. Gestational diabetes mellitus and long-term consequences for mother and offspring: a view from Denmark. *Diabetologia* [Internet]. 2016 Jul 12 [cited 2018 Sep 28]; 59(7):1396–9.  
Available from: <http://link.springer.com/10.1007/s00125-016-3985-5>
8. Tam WH, Ma RCW, Ozaki R, Li AM, Chan MHM, Yuen LY, et al. In Utero Exposure to Maternal Hyperglycemia Increases Childhood Cardiometabolic Risk in Offspring. *Diabetes Care* [Internet]. 2017 May [cited 2018 Sep 28]; 40(5):679–86. Available from: <http://care.diabetesjournals.org/lookup/doi/10.2337/dc16-2397>
9. Ratner RE, Christophi CA, Metzger BE, Dabelea D, Bennett PH, Pi-Sunyer X, et al. Prevention of diabetes in women with a history of gestational diabetes: effects of metformin and lifestyle interventions. *J Clin Endocrinol Metab* [Internet]. 2008 Dec [cited 2018 Sep 28]; 93(12):4774–9. Available from: <https://academic.oup.com/jcem/article-lookup/doi/10.1210/jc.2008-0772>
10. Bizzarri M, Carlomagno G. Inositol: history of an effective therapy for Polycystic Ovary Syndrome. *Eur Rev Med Pharmacol Sci* [Internet]. 2014 Jul [cited 2018 Sep 29]; 18(13):1896–903. Available from: <http://www.ncbi.nlm.nih.gov/pubmed/25010620>
11. Asplin I, Galasko G, Lerner J. chiro-inositol deficiency and insulin resistance: a comparison of the chiro-inositol- and the myo-inositol-containing insulin mediators isolated from urine, hemodialysate, and muscle of control and type II diabetic subjects. *Proc Natl*

- 1  
2  
3 Acad Sci U S A [Internet]. 1993 Jul 1 [cited 2018 Sep 28]; 90(13):5924–8. Available from:  
4 <http://www.ncbi.nlm.nih.gov/pubmed/8392181>  
5  
6  
7 12. D'anna R, Scilipoti A, Giordano D, Caruso C, Cannata ML, Lieta Interdonato M, et al. myo-  
8 Inositol Supplementation and Onset of Gestational Diabetes Mellitus in Pregnant Women  
9 With a Family History of Type 2 Diabetes A prospective, randomized, placebo-controlled  
10 study. Diabetes Care [Internet]. 2013 [cited 2018 Sep 28]; 36(4):854–857. Available  
11 from:<https://www.ncbi.nlm.nih.gov/pmc/articles/PMC3609506/pdf/854.pdf>  
12  
13  
14 13. Crawford TJ, Crowther CA, Alsweiler J, Brown J. Antenatal dietary supplementation with  
15 myo-inositol in women during pregnancy for preventing gestational diabetes. Cochrane  
16 Database Syst Rev. 2015; 2015(12).  
17  
18  
19 14. Zhang H, Lv Y, Li Z, Sun L, Guo W. The efficacy of myo-inositol supplementation to  
20 prevent gestational diabetes onset: a meta-analysis of randomized controlled trials. J  
21 Matern Neonatal Med [Internet]. 2018 Feb 6 [cited 2018 Sep 28]; 1–7. Available  
22 from:<http://www.ncbi.nlm.nih.gov/pubmed/29343138>  
23  
24  
25 15. Guo X, Guo S, Miao Z, Li Z, Zhang H. Myo-inositol lowers the risk of developing  
26 gestational diabetic mellitus in pregnancies: A systematic review and meta-analysis of  
27 randomized controlled trials with trial sequential analysis. J Diabetes Complications  
28 [Internet]. 2018 Mar [cited 2018 Sep 28]; 32(3):342–8. Available from:  
29 <https://linkinghub.elsevier.com/retrieve/pii/S105687271730225>.  
30  
31  
32 16. Diagnostic Criteria and Classification of Hyperglycaemia First Detected in Pregnancy.  
33 [http://apps.who.int/iris/bitstream/10665/85975/1/WHO\\_NMH\\_MND\\_13.2\\_eng.pdf](http://apps.who.int/iris/bitstream/10665/85975/1/WHO_NMH_MND_13.2_eng.pdf)  
34  
35  
36 17. HYPE RTE N SION. [https://www.acog.org/~media/Task Force and Work Group](https://www.acog.org/~media/Task_Force_and_Work_Group_Reports/public/HypertensioninPregnancy.pdf)  
37 [Reports/public/HypertensioninPregnancy.pdf](https://www.acog.org/~media/Task_Force_and_Work_Group_Reports/public/HypertensioninPregnancy.pdf)  
38  
39  
40 18. Levene I, Wilkinson D. Identification and management of neonatal hypoglycaemia in the  
41 full-term infant (British Association of Perinatal Medicine—Framework for Practice).  
42 Archives of Disease in Childhood-Education and Practice. 2019 Feb 1;104(1):29-32.  
43  
44  
45  
46  
47  
48  
49  
50  
51  
52  
53  
54  
55  
56  
57  
58  
59  
60

# Diagram 1: A study overview

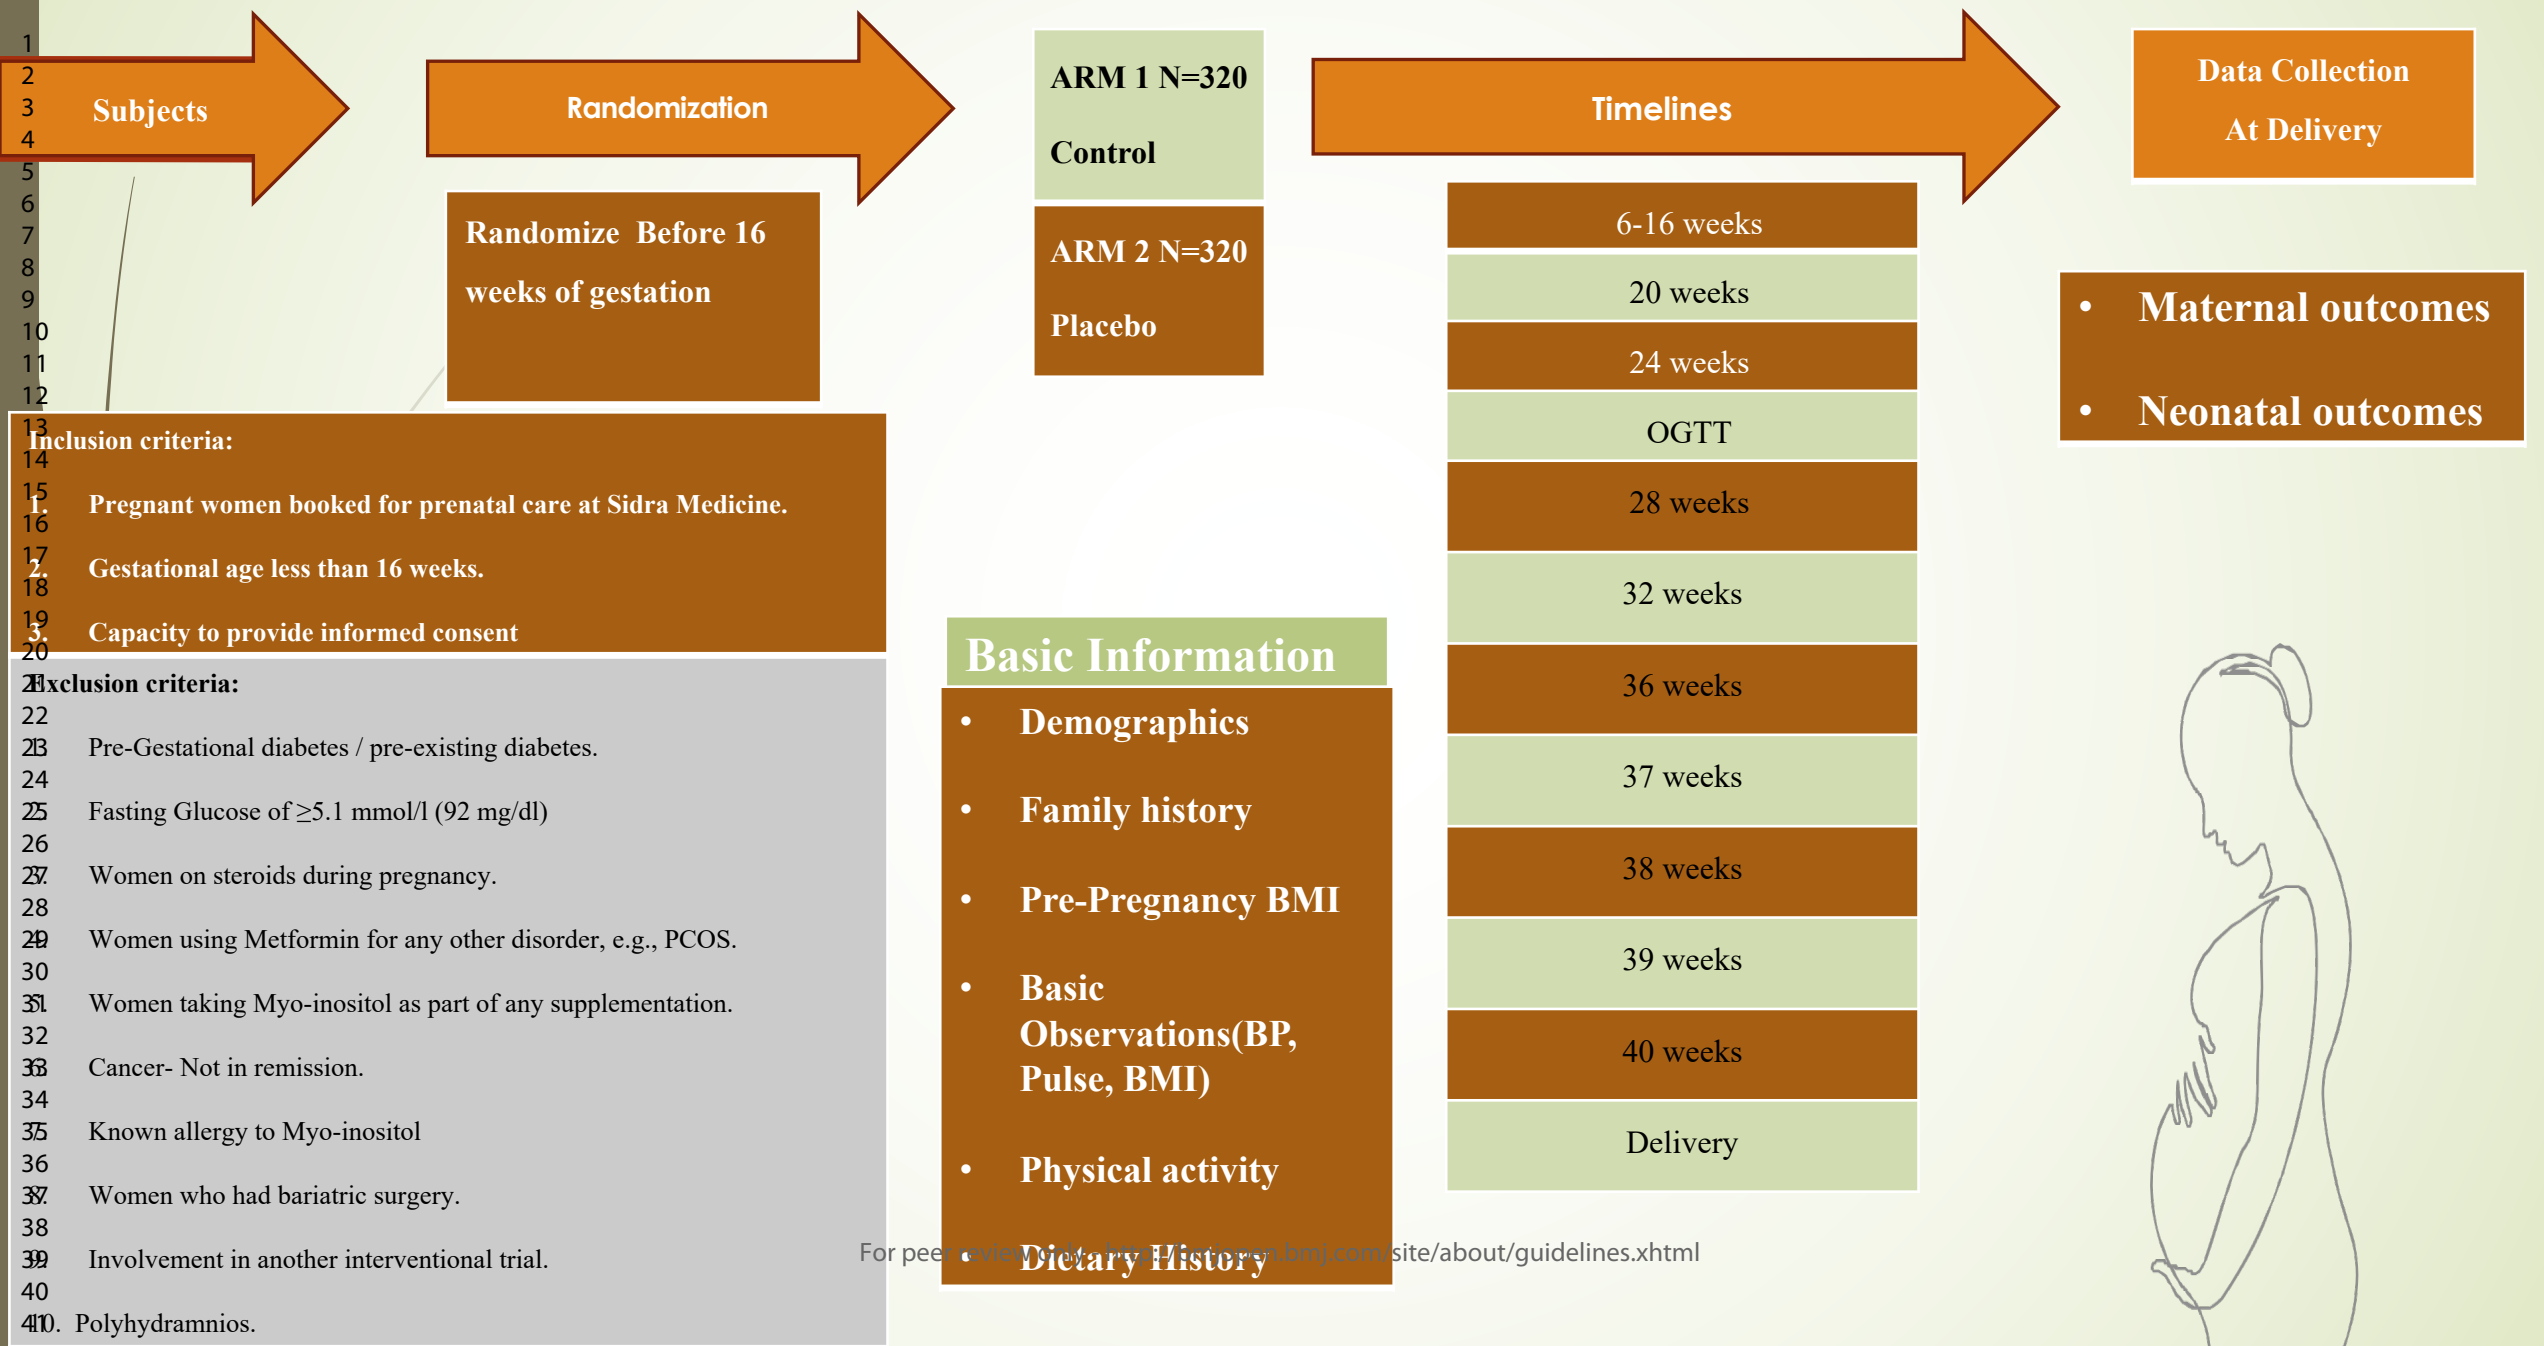

Subjects

Randomization

ARM 1 N=320

Control

ARM 2 N=320

Placebo

Timelines

Data Collection

At Delivery

Randomize Before 16 weeks of gestation

6-16 weeks

20 weeks

24 weeks

OGTT

28 weeks

32 weeks

36 weeks

37 weeks

38 weeks

39 weeks

40 weeks

Delivery

- Maternal outcomes
- Neonatal outcomes



**Inclusion criteria:**

1. Pregnant women booked for prenatal care at Sidra Medicine.
2. Gestational age less than 16 weeks.
3. Capacity to provide informed consent

**Exclusion criteria:**

1. Pre-Gestational diabetes / pre-existing diabetes.
2. Fasting Glucose of  $\geq 5.1$  mmol/l (92 mg/dl)
3. Women on steroids during pregnancy.
4. Women using Metformin for any other disorder, e.g., PCOS.
5. Women taking Myo-inositol as part of any supplementation.
6. Cancer- Not in remission.
7. Known allergy to Myo-inositol
8. Women who had bariatric surgery.
9. Involvement in another interventional trial.
10. Polyhydramnios.

**Basic Information**

- Demographics
- Family history
- Pre-Pregnancy BMI
- Basic Observations(BP, Pulse, BMI)
- Physical activity
- Dietary History

Table 1. MiGDM Study Overview

| Time point                 | 6-16 wks | 20 wks | 24 wks | 28 wks | 32 wks | 36 wks | 37 wks | 38 wks | 39 wks | 40 wks | Delivery |
|----------------------------|----------|--------|--------|--------|--------|--------|--------|--------|--------|--------|----------|
| <b>Measurement</b>         |          |        |        |        |        |        |        |        |        |        |          |
| Demographics               | X        |        |        |        |        |        |        |        |        |        |          |
| Family history             | X        |        |        |        |        |        |        |        |        |        |          |
| Pre-Pregnancy BMI          | X        |        |        |        |        |        |        |        |        |        |          |
| BP and HR                  | X        | X      | XX     | X      | X      | X      | X      | X      | X      | X      | X        |
| Physical activity          | X        |        |        |        |        |        |        |        |        |        |          |
| Maternal outcomes          |          |        |        |        |        |        |        |        |        |        | X        |
| Neonatal outcomes          |          |        |        |        |        |        |        |        |        |        | X        |
| C-peptide<br>Insulin, OGTT |          |        | X      | X      |        |        |        |        |        |        |          |
| Routine clinic tests       | X        |        |        |        |        |        |        |        |        |        |          |
| Ultrasound scan            |          | X      |        | X      | X      | X      |        |        |        |        |          |



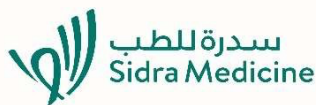

## IRB-400 Informed Consent Form For Research Study

|                         |                                                                                                                                                                                                             |
|-------------------------|-------------------------------------------------------------------------------------------------------------------------------------------------------------------------------------------------------------|
| Protocol Title:         | <b>Effect of antenatal dietary Myo-inositol supplementatiom in women during pregnancy on the incidence of gestational diabetes mellitus and fetal outcome : A randomized controlled trial (MiGDM TRIAL)</b> |
| Protocol Number:        | <b>1538656</b>                                                                                                                                                                                              |
| Sponsor:                | <b>Sidra Medicine-IRF</b>                                                                                                                                                                                   |
| Principal Investigator: | <b>Dr Ibrahim Mamoun Ibrahim</b>                                                                                                                                                                            |
| Site Address:           | <b>Sidra Medicine, Doha, Qatar</b>                                                                                                                                                                          |
| Telephone Number:       | <b>30016566</b>                                                                                                                                                                                             |

### 1. Introduction

Before agreeing to participate in this research study, please read and understand the following explanation of the proposed study. This informed consent form describes the purpose, procedures and risks of the study. It also describes your right to withdraw from the study at any time, and that you are volunteering. Also, that no guarantees or assurances can be made as to the results of the study. Please feel free to ask questions.

### 2. Background and Purpose

The background and purpose of this research study is to ascertain whether we can reduce the chances of developing diabetes during pregnancy through the use of simple nutritional supplement in women who are pregnant.

Diabetes is a relatively common health problem in Qatar and during pregnancy up to one in four pregnant women are affected by diabetes in Qatar. Pregnancies affected by diabetes carry additional problems for the expectant mother and her unborn baby. Some of these problems can be prevented or reduced through the use of currently available treatments. Treatments currently used for diabetes during pregnancy include targeted dietary and lifestyle changes as well as the use of tablets or injection (insulin) to keep blood sugar level within a healthy range. Whilst these treatments are helpful, they can be time-consuming, inconvenient and carry potential side-effects particularly treatment by injection. In addition, the problems caused by diabetes to the mother and her unborn baby are not always preventable even when current treatments are used. Therefore, the ideal goal if possible, is the to prevent diabetes during pregnancy altogether, and this is the reason we are undertaking this research study. By reducing the chances of developing diabetes during pregnancy, problems associated with having diabetes can also be reduced or prevented altogether.

### 3. Number of Subjects

About 640 subjects will participate in this study and this is the only site for the entire study nationally.

### 4. Study Duration and Length of Participation

1  
2  
3  
4  
5 Your participation in this study will last approximately 32 weeks and will include a maximum of 8 visits to  
6 the study center. We also expect that this research study will last approximately two years to complete  
7 although your involvement will only be till the end of your pregnancy.  
8

## 9 **5. Procedures**

10  
11 Your participation will involve attendance at the Sidra Obstetric clinic which is located on the fourth floor of  
12 the Sidra outpatient building. There will be monthly attendances from the time you enroll to participate in  
13 the study until delivery of the baby and this will coincide with your regular antenatal visits. Each attendance  
14 will last for approximately 45 minutes to one hour and includes your normal antenatal appointment with a  
15 Doctor or midwife. The first two appointments may be longer to allow a detailed explanation of the  
16 purpose of this research and seek your written permission. The research coordinator will meet with you at  
17 your first visit and provide a detailed explanation of the research and also provide you with a direct contact  
18 telephone number and additional written information about the research in addition to arranging the follow  
19 up visit. A clinical dietician will call you after each visit to ask about your lifestyle and dietary habits using  
20 short questionnaires.  
21  
22

23 Your participation will involve the collection of a packet of research supplements to be taken daily  
24 throughout the duration of your involvement in the research. The supplement could either be myoinositol  
25 or an inactive supplement, both of which are safe to use during pregnancy.  
26

27 You will be offered a test for diagnosing diabetes during pregnancy called the Oral Glucose Tolerance  
28 test (OGTT), between 6 and 7 months of pregnancy (24-28 weeks). This test is part of the standard antenatal  
29 care and will be offered even if you were not taking part in this research. The test usually takes about two  
30 hours to complete and involves three blood samples, about table spoonful to be taken at hourly intervals.  
31 An additional blood sample, half a table spoonful ( 5 mls ) will be taken specifically for the purpose of this  
32 research, this will measure the precursor of the Insulin hormone ( C-peptide), to find out the reasons why  
33 some women develop diabetes in pregnancy and how to prevent it. All the visits related to this research will  
34 take place in the outpatient clinic setting, there will be no admission or overnight stay in the hospital related  
35 to this research.  
36  
37

38 If you agree to participate, the researchers will also collect details of your medical history, previous pregnancy  
39 history and the outcome of your current pregnancy from the hospital electronic medical records. The details  
40 of the baby including birth weight and condition at birth and mode of delivery will also be collected. You will  
41 have your standard antenatal care whether or not you choose to participate in the research. Your standard  
42 antenatal care will consist of scheduled blood tests, ultrasound scan of the baby and antenatal consultations.  
43 If you choose to take part in the research, you will be required to take the research supplement on a daily  
44 basis. The research supplement contains either Myoinositol or an inactive supplement. The researchers and  
45 yourself will not know which of these supplements you will receive to avoid unintended bias. The decision on  
46 which of the supplement you will receive will be determined by chance, with every one having an equal  
47 chance of receiving the Myoinositol or the inactive supplement.  
48  
49  
50

## 51 **6. Alternative Procedures**

52  
53 This study is for research purposes only. The only alternative is to not participate in this study and you will  
54 have your standard antenatal care as usual  
55  
56  
57  
58  
59  
60

## 7. Risks, Side Effects and/or Discomforts

The potential risks and side effects associated with procedures involved in the research are as follows:

- Blood samples: possible side effects from blood drawing include faintness, inflammation of the vein, pain, bruising, or bleeding at the site of puncture. There is also a slight possibility of infection.
- Taking the research supplements: There is no known risk we are aware of that is associated with taking the research supplement, having been used widely around the world.

## 8. Unforeseen Risks

There are no known risk for study participation. The safety to the fetus is not studied well, but there is no known or foreseeable risk to the fetus from myo-inositol or placebo.

## 9. Pregnancy (include if applicable)

This research is designed specifically for participants who are currently pregnant.

## 10. New Findings

Any new important information that is discovered during the study and which may influence your willingness to continue participation in the study will be made available to you. This might include changes in procedures, changes in the risks or benefits of participation, or any new alternatives to participation that the researchers learn about.

## 11. Individual Results from the Research Tests/Surveys

Generally, tests done for research purposes are not meant to provide results or clinical information that apply to you alone

## 12. Benefits

This study is for research purposes only. There could be potential benefits if it happens that you are assigned to one of the 2 treatment arms (Myoinositol or placebo), however neither you nor the Principal investigator knows which arm of the study you are assigned into until the end of the study.

A brief fact sheet about Myoinositol is provided along with this consent form for information only.

## 13. Costs

There will be no charge to you for your participation in this study. The study-related procedures will be provided at no charge to you or your insurance company. The study visits will be aligned with your standard antenatal care visits according to the agreed care plan with Sidra Medicine. The cost of the routine visit will be according to the agreed care plan with Sidra Medicine and will not be paid by the research funds.

## 14. Compensation for Participation

You will not receive any monetary compensation for your participation in this study.

## 15. Research Related Injuries

If you are injured or made sick from taking part in this research study, call Dr Ibrahim Ibrahim immediately, T. +974-30016566, or alternatively contact Sidra Medicine Emergency Department.

Medical care will be provided to you at Sidra Medicine at no charge. In case we were unable to provide care to you at Sidra, we will arrange and pay for your care at Hamad Medial Corporation (HMC). If you receive care at another institution, you or your insurance will have to pay for that care in accordance with the

1  
2  
3  
4  
5 policies of that institution. Sidra Medicine has no program or funds set aside to compensate you for  
6 research-related injuries or to pay for medical care for research-related injuries at institutions other than  
7 HMC or Sidra. Contact the Principal Investigator for more information  
8

## 9 **16. Confidentiality**

10 Records of your participation in this study will be held confidential except as disclosure is required by law or  
11 as described in this informed consent document. Efforts will be made to limit your personal information,  
12 including research study and medical records, to people who have a need to review this information.  
13

14 The investigator, authorized research personnel, the sponsor or persons working on behalf of the sponsor,  
15 monitors, auditors, MOPH, other regulatory agencies (when applicable) and the Institutional Review Board  
16 (IRB) will be able to inspect and copy confidential study-related records which identify you by name. They  
17 will be granted direct access to your medical records for verification of the research procedures and date.  
18 Therefore, absolute confidentiality cannot be guaranteed. By signing this document, you are authorizing  
19 this access.  
20

21 We may publish the results of this research. However, we will keep your name and other identifying  
22 information confidential.  
23

24 We will take careful steps to keep your information confidential. We will store your identifiable information,  
25 in a password-protected database; encrypted file which changes it to another format to protect it from  
26 being accessed by anyone outside of the approved staff.  
27

28 We will remove your name or other direct identifiers from your information or samples. We will label your  
29 information or samples with a code. We will store the key that links the code to your identity separately. Only  
30 select staff will have access to the list that links the code to you.  
31

32 The staff follow procedures to keep your identity secret to the extent allowed by law. In very unusual cases,  
33 staff may be required to release your identifiable medical and research information to the extent allowed by  
34 law.  
35

36 A description of this clinical trial will be available on <http://www.ClinicalTrials.gov>. This Web site will not  
37 include information that can identify you. At most, the Web site will include a summary of the results. You can  
38 search this Web site at any time.  
39  
40  
41

## 42 **17. Commercial Gain**

43 Your information or samples collected during this study will no longer belong to you. Information or  
44 samples may be used for the development of new products, treatments, processes or services for  
45 commercial sale. There are no plans to offer you financial compensation or share any profits with you or  
46 your relatives should this occur.  
47

48 You will not, however, lose any legal rights to which you are entitled by signing this consent.  
49

## 50 **18. Research Team Contact**

51 During the study, if you experience any medical problems, suffer a research-related injury, or have  
52 questions, concerns or complaints about the study, contact the investigator Dr Ibrahim Ibrahim on +974  
53 30016566  
54  
55

## 56 **19. IRB Contact**

An Institutional Review Board (IRB) is an independent committee established to help protect the rights of research subjects. IRB at Sidra has reviewed and approved this study. Both the IRB at Sidra and the Qatari Ministry of public health (MOPH) will be promptly notified in the event of research related injury. If you have any questions about your rights as a research subject, and/or concerns or complaints regarding this research study, Email: [irb@sidra.org](mailto:irb@sidra.org), or T. +974-4003-7747 during business hours Sunday- Thursday 7:30 a.m. to 4:00 p.m.

## 20. Voluntary Participation/Withdrawal

Your decision to participate in this study is voluntary. You may choose to not participate or you may withdraw from the study for any reason without penalty or loss of benefits to which you are otherwise entitled and without any effect on your future medical care.

If you choose to withdraw from the study after a period of participation, you will continue to receive your pregnancy care according to the standard schedule of antenatal, intrapartum and postpartum care. You will be asked to return the unused trial packs to the research nurse to complete the appropriate documentation. The research nurse will return the unused packs to the trial Pharmacist.

The investigator or the sponsor can stop your participation at any time without your consent for the following reasons:

- If you fail to follow directions for participating in the study;
- If it is discovered that you do not meet the study requirements;
- If the study is cancelled.

## 21. Place and Duration of Storage of Information or Samples

The information will be stored at Sidra Medicine, Doha, Qatar for no longer than 3 years. Only the Investigator or authorized Sidra research team members will have access to the information.

## 22. Providing Information or Samples to Recipient Researchers (include if applicable)

Before sharing your information we will replace identifiers such as (e.g., your name, medical record number, or date of birth) with a code. Your coded information may be shared with other Sidra researchers and researchers outside of Sidra, without your additional informed consent.

## 23. Optional Future Use:

Do you give permission for Dr Ibrahim Ibrahim under the auspices of Sidra Medicine to store and share your information for future research in compliance with applicable regulations and institutional policies?

Yes  No      Initials

Remember, you can still be in the main study even if you even if you do not wish to allow your information and/or specimens stored for this investigator's future research.

## 24. Participating in Future Studies

The research staff would like to contact you with information about participating in future studies. You give your permission for the investigator or staff to contact you regarding your willingness to participate in future research studies?  **Yes**  **No** Initials

## 25. Consent

I have read and understand the information in this informed consent document. I have had an opportunity to ask questions. All my questions have been answered to my satisfaction. I voluntarily agree to participate in this study until I decide otherwise. I do not give up any of my legal rights by signing this consent document. I will receive a copy of this signed consent document.

\_\_\_\_\_  
Printed Name of Subject

\_\_\_\_\_  
Signature of Subject

\_\_\_\_\_  
Date

\_\_\_\_\_  
Printed Name of the Person Conducting the Consent Discussion

\_\_\_\_\_  
Signature of the Person Conducting the Consent Discussion

\_\_\_\_\_  
Date

## 26. Consent for Subjects Who Cannot Read *(include if applicable)*

The study subject has indicated that he/she is unable to read. The consent document has been read to the subject by a member of the study staff, discussed with the subject by a member of the study staff, and the subject has been given an opportunity to ask questions of the study staff.

\_\_\_\_\_  
Printed Name of Impartial Witness

\_\_\_\_\_  
Signature of Impartial Witness\*

\_\_\_\_\_  
Date

*\*Impartial Witness: A person, who is independent of the trial, who cannot be unfairly influenced by people involved with the trial, who attends the informed consent process if the subject or the subject's legally acceptable representative cannot read, and who reads the informed consent and any other written information supplied to the subject. Guidance for Industry E6 Good Clinical Practice: Consolidated Guidance*

## 27. For Children Who Become Adults *(include if applicable)*

Not applicable

Subject ID: \_\_\_\_\_

Interview date (dd/mm/yy): --/--/--

## Lifestyle

- 1- During the **last 7 days**, how many times did you **walk** for at least 10 minutes?
  - a. None
  - b. Once
  - c. Twice
  - d. 3 times
  - e. 4 times
  - f. 5 times
  - g. 6 times
  - h. 7 times and more
- 2- How much time did you usually spend **walking** per day?  
\_\_\_\_\_ **hours per day**  
\_\_\_\_\_ **minutes per day**
- 3- During the **last 7 days**, on how many times did you do **vigorous** physical activities like aerobics, running, fast bicycling, or fast swimming?
  - a. None
  - b. Once
  - c. Twice
  - d. 3 times
  - e. 4 times
  - f. 5 times
  - g. 6 times
  - h. 7 times and more



- 1  
2  
3  
4  
5  
6  
7  
8  
9  
10  
11  
12  
13  
14  
15  
16  
17  
18  
19  
20  
21  
22  
23  
24  
25  
26  
27  
28  
29  
30  
31  
32  
33  
34  
35  
36  
37  
38  
39  
40  
41  
42  
43  
44  
45  
46  
47  
48  
49  
50  
51  
52  
53  
54  
55  
56  
57  
58  
59  
60
- 4- How much time did you usually spend doing **vigorous** physical activities?
- \_\_\_\_\_ **hours per day**
- \_\_\_\_\_ **minutes per day**
- 5- During the **last 7 days**, on how many times did you do **moderate** physical activities like bicycling at a regular pace, swimming at a regular pace, and doubles tennis?
- None
  - Once
  - Twice
  - 3 times
  - 4 times
  - 5 times
  - 6 times
  - 7 times and more
- 6- How much time did you usually spend doing **moderate** physical activities?
- \_\_\_\_\_ **hours per day**
- \_\_\_\_\_ **minutes per day**
- 7- During the **last 7 days**, how much time did you usually spend watching a screen (TV, computer, phone, or other devices)?
- ½ hour or less
  - 1 hour
  - 2 hours
  - 3 hours
  - 4 hours
  - 5 hours
  - more than 5 hours



1  
2  
3 8- On average, how many hours per day do you spent in sleeping?  
4

- 5 a. 3 hours or less  
6  
7 b. 4 hours  
8  
9 c. 5 hours  
10  
11 d. 6 hours  
12  
13 e. 7 hours  
14  
15 f. 8 hours  
16  
17 g. 9 hours or more  
18  
19  
20  
21  
22  
23  
24  
25  
26  
27  
28  
29  
30  
31  
32  
33  
34  
35  
36  
37  
38  
39  
40  
41  
42  
43  
44  
45  
46  
47  
48  
49  
50  
51  
52  
53  
54  
55  
56  
57  
58  
59  
60

## FOOD FREQUENCY

Research patient ID

XXX

|                                                                                                                                                                                                            |                                                                                                                                          |                                                                                                                                                              |
|------------------------------------------------------------------------------------------------------------------------------------------------------------------------------------------------------------|------------------------------------------------------------------------------------------------------------------------------------------|--------------------------------------------------------------------------------------------------------------------------------------------------------------|
| Date ____ - ____ -20 ____                                                                                                                                                                                  |                                                                                                                                          |                                                                                                                                                              |
| <input type="radio"/> 1 <sup>st</sup> Trimester <input type="radio"/> 2 <sup>nd</sup> Trimester <input type="radio"/> 3 <sup>rd</sup> Trimester <input type="radio"/> Delivery                             |                                                                                                                                          |                                                                                                                                                              |
| How frequently do you <b>DRINK</b> the following?                                                                                                                                                          |                                                                                                                                          | <b>Frequency and Quantity per day</b>                                                                                                                        |
| Milk products: <ul style="list-style-type: none"> <li>• Full fat cow milk</li> <li>• low fat cow milk</li> <li>• skimmed cow milk</li> <li>• Soya milk</li> <li>• Sweetened milk/condensed milk</li> </ul> | <input type="radio"/> No<br><input type="radio"/> No<br><input type="radio"/> No<br><input type="radio"/> No<br><input type="radio"/> No | Yes, how many Cups/day _____<br>Yes, how many Cups/day _____<br>Yes, how many Cups/day _____<br>Yes, how many Cups/day _____<br>Yes, how many Cups/day _____ |
| Water                                                                                                                                                                                                      | <input type="radio"/> No                                                                                                                 | Yes, how many glasses/day _____                                                                                                                              |
| Tea/coffee                                                                                                                                                                                                 | <input type="radio"/> No                                                                                                                 | Yes, how many Cups/day _____                                                                                                                                 |
| Soft drinks (coca, sprite, fanta)                                                                                                                                                                          | <input type="radio"/> No                                                                                                                 | Yes, how many Cups/day _____                                                                                                                                 |
| Freshly pressed fruit/vegetable juice                                                                                                                                                                      | <input type="radio"/> No                                                                                                                 | Yes, how many Cups/day _____                                                                                                                                 |
| Alcohol                                                                                                                                                                                                    | <input type="radio"/> No                                                                                                                 | Yes, how many glasses/day _____                                                                                                                              |
| How frequently do you <b>EAT</b> the following?                                                                                                                                                            |                                                                                                                                          | <b>Frequency and Quantity per day</b><br>Tablespoon (TBS), Teaspoon (TSP)                                                                                    |
| Bread                                                                                                                                                                                                      | <input type="radio"/> No                                                                                                                 | <input type="radio"/> slice <input type="radio"/> whole bread, how many/day _____                                                                            |
| Cereals                                                                                                                                                                                                    | <input type="radio"/> No                                                                                                                 | <input type="radio"/> Cup <input type="radio"/> TBS <input type="radio"/> TSP, how many/day _____                                                            |
| Rice                                                                                                                                                                                                       | <input type="radio"/> No                                                                                                                 | <input type="radio"/> Cup <input type="radio"/> TBS <input type="radio"/> TSP, how many/day _____                                                            |
| Biscuit, pancake, rusks slice                                                                                                                                                                              | <input type="radio"/> No                                                                                                                 | <input type="radio"/> how many/day _____                                                                                                                     |
| Legumes, beans                                                                                                                                                                                             | <input type="radio"/> No                                                                                                                 | <input type="radio"/> Cup <input type="radio"/> TBS <input type="radio"/> TSP, how many/day _____                                                            |
| Fresh vegetables                                                                                                                                                                                           | <input type="radio"/> No                                                                                                                 | <input type="radio"/> Cup <input type="radio"/> TBS <input type="radio"/> TSP, how many/day _____                                                            |
| Cooked vegetables                                                                                                                                                                                          | <input type="radio"/> No                                                                                                                 | <input type="radio"/> Cup <input type="radio"/> TBS <input type="radio"/> TSP, how many/day _____                                                            |
| Fruits                                                                                                                                                                                                     | <input type="radio"/> No                                                                                                                 | <input type="radio"/> Cup <input type="radio"/> TBS <input type="radio"/> TSP, how many/day _____                                                            |
| Nuts                                                                                                                                                                                                       | <input type="radio"/> No                                                                                                                 | <input type="radio"/> Cup <input type="radio"/> TBS <input type="radio"/> TSP, how many/day _____                                                            |
| Tubers, potatoes, sweet potatoes                                                                                                                                                                           | <input type="radio"/> No                                                                                                                 | <input type="radio"/> Cup <input type="radio"/> TBS <input type="radio"/> TSP, how many/day _____                                                            |
| Noodles, Pasta                                                                                                                                                                                             | <input type="radio"/> No                                                                                                                 | <input type="radio"/> Cup <input type="radio"/> TBS <input type="radio"/> TSP, how many/day _____                                                            |
| Red meat                                                                                                                                                                                                   | <input type="radio"/> No                                                                                                                 | <input type="radio"/> Cup <input type="radio"/> TBS <input type="radio"/> TSP, how many/day _____                                                            |

|                                                                                                                                                               |                          |                                                                                                                                                                                                                                                                                                                                                                                                              |
|---------------------------------------------------------------------------------------------------------------------------------------------------------------|--------------------------|--------------------------------------------------------------------------------------------------------------------------------------------------------------------------------------------------------------------------------------------------------------------------------------------------------------------------------------------------------------------------------------------------------------|
| Poultry                                                                                                                                                       | <input type="radio"/> No | <input type="radio"/> Cup <input type="radio"/> TBS <input type="radio"/> TSP, how many/day_____                                                                                                                                                                                                                                                                                                             |
| Fish, seafood                                                                                                                                                 | <input type="radio"/> No | <input type="radio"/> Cup <input type="radio"/> TBS <input type="radio"/> TSP, how many/day_____                                                                                                                                                                                                                                                                                                             |
| Processed food (roast chicken, turkey, beef sausage)                                                                                                          | <input type="radio"/> No | <input type="radio"/> slice, how many/day _____                                                                                                                                                                                                                                                                                                                                                              |
| Dairy products (cheese, yogurt, leban, labnaa)                                                                                                                | <input type="radio"/> No | <input type="radio"/> Cup <input type="radio"/> TBS <input type="radio"/> TSP, how many/day_____                                                                                                                                                                                                                                                                                                             |
| Eggs                                                                                                                                                          | <input type="radio"/> No | <input type="radio"/> how many/day_____                                                                                                                                                                                                                                                                                                                                                                      |
| Pizza                                                                                                                                                         | <input type="radio"/> No | <input type="radio"/> whole <input type="radio"/> slice, how many/day_____                                                                                                                                                                                                                                                                                                                                   |
| Do you use oil? Which one?<br><ul style="list-style-type: none"> <li>• olive oil</li> <li>• corn oil</li> <li>• sunflower oil</li> <li>• other oil</li> </ul> | <input type="radio"/> No | <input type="radio"/> Cup <input type="radio"/> TBS <input type="radio"/> TSP, how many/day_____<br><input type="radio"/> Cup <input type="radio"/> TBS <input type="radio"/> TSP, how many/day_____<br><input type="radio"/> Cup <input type="radio"/> TBS <input type="radio"/> TSP, how many/day_____<br><input type="radio"/> Cup <input type="radio"/> TBS <input type="radio"/> TSP, how many/day_____ |
| Do you use fats? Which one?<br><ul style="list-style-type: none"> <li>• butter</li> <li>• ghee</li> <li>• lard</li> </ul>                                     | <input type="radio"/> No | <input type="radio"/> Cup <input type="radio"/> TBS <input type="radio"/> TSP, how many/day_____<br><input type="radio"/> Cup <input type="radio"/> TBS <input type="radio"/> TSP, how many/day_____<br><input type="radio"/> Cup <input type="radio"/> TBS <input type="radio"/> TSP, how many/day_____                                                                                                     |
| Do you use salt?                                                                                                                                              | <input type="radio"/> No | <input type="radio"/> Cup <input type="radio"/> TBS <input type="radio"/> TSP, how many/day_____                                                                                                                                                                                                                                                                                                             |
| Do you use sugar?                                                                                                                                             | <input type="radio"/> No | <input type="radio"/> Cup <input type="radio"/> TBS <input type="radio"/> TSP, how many/day_____                                                                                                                                                                                                                                                                                                             |
| How frequently do you <b>have the following habit</b> ?                                                                                                       |                          | <b>Frequency per week</b>                                                                                                                                                                                                                                                                                                                                                                                    |
| Do you eat fast food?                                                                                                                                         | <input type="radio"/> No | Yes, how many times/week _____                                                                                                                                                                                                                                                                                                                                                                               |
| Do you eat fried potatoes (French fries and chips)                                                                                                            | <input type="radio"/> No | Yes, how many times/week _____                                                                                                                                                                                                                                                                                                                                                                               |
| Do you eat chocolate, cookies, cake and donuts                                                                                                                | <input type="radio"/> No | Yes, how many times/week _____                                                                                                                                                                                                                                                                                                                                                                               |

### 24HDR

|                                          |  |
|------------------------------------------|--|
| <b>Patient ID:</b>                       |  |
| <b>Dates of recorded intake:</b>         |  |
| <b>Nutritionist:</b>                     |  |
| <b>Nutritionist Contact Information:</b> |  |

### Instructions for Keeping Your 24Hrs Food Record

- Please keep your 24hr food record for one day.
- Select day that closely resemble your usual eating habits.
- Each time you eat or drink anything (meals, snacks, etc.) during the day, write down what and how much was served and what and how much was eaten.
- To measure how much was eaten, use a set of **measuring cups and spoons** to help estimate amounts. Also see the examples below to estimate portion sizes.
- Note if food choices are homemade or purchased. Please include brand names whenever possible.

### Amounts and Conversions

- 1/4 cup = 50 ml or 4 Tablespoons
- 1/3 cup = 75 ml or 5 1/2 Tablespoons
- 1/2 cup = 125 ml or 8 Tablespoons
- 2/3 cup = 150 ml or 10 1/2 Tablespoons
- 3/4 cup = 175 ml or 12 Tablespoons
- 1 cup = 250 ml or 16 Tablespoons
- 1 glass = 200 ml
- 30 gr = 1 slice of processed cheese or lunchmeat

## How to Estimate Your Portion Size

|                                                                                                           |                                                                                     |
|-----------------------------------------------------------------------------------------------------------|-------------------------------------------------------------------------------------|
| <p><b>Meat</b><br/>Ninety (90) gr of meat are about the size and thickness of a deck of playing cards</p> |  |
| <p><b>Fruit</b><br/>A medium apple or peach is about the size of a tennis ball</p>                        |  |
| <p><b>Grains</b><br/>One cup of rice or pasta is about the size of your fist</p>                          |  |
| <p><b>Cheese</b><br/>Thirty (30) gr of cheese is about the size of four dice</p>                          |  |

1  
2  
3  
4  
5  
6  
7  
8  
9  
10  
11  
12  
13  
14  
15  
16  
17  
18  
19  
20  
21  
22  
23  
24  
25  
26  
27  
28  
29  
30  
31  
32  
33  
34  
35  
36  
37  
38  
39  
40  
41  
42  
43  
44  
45  
46  
47

**Three-Day Food Record Checklist**

|                      |                                                                                                                                                 |
|----------------------|-------------------------------------------------------------------------------------------------------------------------------------------------|
| <b>Beverages</b>     | What kind of milk? Homo, 2%, 1%, skim, other.<br>Was it fruit juice or fruit beverage or drink?                                                 |
| <b>Breads</b>        | Did you spread on butter or margarine?                                                                                                          |
| <b>Cereal</b>        | Did you add milk?<br>Did you add sugar or fruit?                                                                                                |
| <b>Dairy</b>         | What brand or kind of yogurt?<br>What brand or kind of cheese?                                                                                  |
| <b>Vegetables</b>    | Was it raw or cooked?<br>Was it fresh, frozen or canned?<br>Did you add any butter, margarine or sauce?                                         |
| <b>Fruit</b>         | Was it a small, medium or large fruit?<br>Was it fresh, frozen or canned?                                                                       |
| <b>Grains</b>        | Did you add any butter, margarine, peanut butter, jam or honey?<br>Was it a half or whole sandwich?<br>Was it a small or large muffin or bagel? |
| <b>Fish</b>          | Was your canned fish packed in water or oil<br>How did you cook your fish?                                                                      |
| <b>Meats</b>         | How did you cook your meat?<br>What kind of cut was it e.g. chicken leg or chicken breast?                                                      |
| <b>Soups</b>         | Was your soup prepared with milk, water or cream?                                                                                               |
| <b>Restaurants</b>   | What restaurant was it?                                                                                                                         |
| <b>Packaged food</b> | What brand was it?                                                                                                                              |

## SAMPLE MENU – 24 HRS

Day 1: Tuesday, May 14, 2015

| Time of Meal or Snack | Type of Food or Beverage Offered | Amount Eaten | Method of Preparation or Brand           | Comments<br>(e.g. amount of food served, too tired to eat) |
|-----------------------|----------------------------------|--------------|------------------------------------------|------------------------------------------------------------|
| Breakfast             | Cereal                           | ½ cup        | Honey Nut Cheerios                       |                                                            |
|                       | Milk 2%                          | ½ cup        |                                          | On cereal                                                  |
|                       | Banana                           | ½ med        |                                          |                                                            |
| AM Snack              | Animal Crackers                  | 10           | Christie                                 |                                                            |
|                       | Apple juice                      | 120 gr       | Allen's pure apple juice-canned          |                                                            |
| Lunch                 | Grilled cheese sandwich          |              |                                          |                                                            |
|                       | Whole wheat bread                | 1 slice      | Dempsters                                | No crusts                                                  |
|                       | Cheese slice                     | 1 slice      | Kraft slices                             |                                                            |
|                       | Butter on bread                  | 1 Tbsp       |                                          |                                                            |
|                       | Yogurt – strawberry              | 75 ml        | Mini-go                                  |                                                            |
|                       | Milk                             | ½ cup        | 2%                                       |                                                            |
| PM Snack              | Granola bar                      | 1 bar – 35 g | Quaker Chewy, Trail Mix – tropical fruit | Ate half of it                                             |
| Dinner                | Chicken fingers                  | 1 ½          | President's Choice                       |                                                            |
|                       | French fries                     | 10           | McCain regular                           |                                                            |
|                       | Honey                            | 2 Tbsp       |                                          | For dipping                                                |
|                       | Ketchup                          | 2 Tbsp       | Heinz                                    |                                                            |
|                       | Carrots                          | ½ medium     | Raw, cut in sticks                       |                                                            |
|                       | Milk                             | ½ cup        | 2%                                       |                                                            |
| Evening Snack         | Ice cream                        | 1 cup        | Chocolate Nestle                         |                                                            |

Was this day's intake considered: [ ] Poor [X] Average [ ] Very Good

24 HRS

| Date:                 |                                  |              |                                |                                                            |
|-----------------------|----------------------------------|--------------|--------------------------------|------------------------------------------------------------|
| Time of Meal or Snack | Type of Food or Beverage Offered | Amount Eaten | Method of Preparation or Brand | Comments<br>(e.g. amount of food served, too tired to eat) |
| Breakfast             |                                  |              |                                |                                                            |
|                       |                                  |              |                                |                                                            |
|                       |                                  |              |                                |                                                            |
|                       |                                  |              |                                |                                                            |
| AM Snack              |                                  |              |                                |                                                            |
|                       |                                  |              |                                |                                                            |
| Lunch                 |                                  |              |                                |                                                            |
|                       |                                  |              |                                |                                                            |
|                       |                                  |              |                                |                                                            |
|                       |                                  |              |                                |                                                            |
| PM Snack              |                                  |              |                                |                                                            |
|                       |                                  |              |                                |                                                            |
| Dinner                |                                  |              |                                |                                                            |
|                       |                                  |              |                                |                                                            |
|                       |                                  |              |                                |                                                            |
|                       |                                  |              |                                |                                                            |
| Evening Snack         |                                  |              |                                |                                                            |
|                       |                                  |              |                                |                                                            |

Was this day's intake considered: [ ] Poor [ ] Average [ ] Very Good





SPIRIT 2013 Checklist: Recommended items to address in a clinical trial protocol and related documents\*

| Section/item                      | Item No | Description                                                                                                                                                                                                                                                                                                               |
|-----------------------------------|---------|---------------------------------------------------------------------------------------------------------------------------------------------------------------------------------------------------------------------------------------------------------------------------------------------------------------------------|
| <b>Administrative information</b> |         |                                                                                                                                                                                                                                                                                                                           |
| Title                             | 1       | Descriptive title identifying the study design, population, interventions, and, if applicable, trial acronym <a href="#">Page 1</a>                                                                                                                                                                                       |
| Trial registration                | 2a      | Trial identifier and registry name. If not yet registered, name of intended registry <a href="#">page 3</a> , <a href="#">Trial registration section</a>                                                                                                                                                                  |
|                                   | 2b      | All items from the World Health Organization Trial Registration Data Set <a href="#">Not applicable</a>                                                                                                                                                                                                                   |
| Protocol version                  | 3       | Date and version identifier <a href="#">Not applicable</a>                                                                                                                                                                                                                                                                |
| Funding                           | 4       | Sources and types of financial, material, and other support <a href="#">Page 14, Funding</a>                                                                                                                                                                                                                              |
| Roles and responsibilities        | 5a      | Names, affiliations, and roles of protocol contributors , <a href="#">Page 1</a> , <a href="#">Authors</a> , <a href="#">Authors affiliation and Page 14 Authors contributions</a>                                                                                                                                        |
|                                   | 5b      | Name and contact information for the trial sponsor <a href="#">Page 14, Funding</a>                                                                                                                                                                                                                                       |
|                                   | 5c      | Role of study sponsor and funders, if any, in study design; collection, management, analysis, and interpretation of data; writing of the report; and the decision to submit the report for publication, including whether they will have ultimate authority over any of these activities <a href="#">Page 14, Funding</a> |
|                                   | 5d      | Composition, roles, and responsibilities of the coordinating centre, steering committee, endpoint adjudication committee, data management team, and other individuals or groups overseeing the trial, if applicable (see Item 21a for data monitoring committee) <a href="#">Not applicable</a>                           |
| <b>Introduction</b>               |         |                                                                                                                                                                                                                                                                                                                           |
| Background and rationale          | 6a      | Description of research question and justification for undertaking the trial, including summary of relevant studies (published and unpublished) examining benefits and harms for each intervention <a href="#">Page 4, Background</a>                                                                                     |
|                                   | 6b      | Explanation for choice of comparators <a href="#">Page 4, Background</a>                                                                                                                                                                                                                                                  |
| Objectives                        | 7       | Specific objectives or hypotheses <a href="#">Page 7, Aim and Hypothesis</a>                                                                                                                                                                                                                                              |

1  
2 Trial design 8 Description of trial design including type of trial (eg, parallel group,  
3 crossover, factorial, single group), allocation ratio, and framework (eg,  
4 superiority, equivalence, noninferiority, exploratory) [Page 7](#),  
5 [Method/Design](#)  
6  
7

## 8 **Methods: Participants, interventions, and outcomes**

9  
10 Study setting 9 Description of study settings (eg, community clinic, academic hospital)  
11 and list of countries where data will be collected. Reference to where  
12 list of study sites can be obtained [Page 7](#), [Method/Design](#)  
13

14 Eligibility criteria 10 Inclusion and exclusion criteria for participants. If applicable, eligibility  
15 criteria for study centres and individuals who will perform the  
16 interventions (eg, surgeons, psychotherapists) [Page 8](#), [Inclusion and](#)  
17 [exclusion criteria](#)  
18  
19

20 Interventions 11a Interventions for each group with sufficient detail to allow replication,  
21 including how and when they will be administered [Page 10](#) ,  
22 [Randomization and Study schedule](#)  
23

24 11b Criteria for discontinuing or modifying allocated interventions for a  
25 given trial participant (eg, drug dose change in response to harms,  
26 participant request, or improving/worsening disease) [Page 11](#) ,  
27 [Randomization and Study schedule](#) , [first paragraph in the page](#)  
28  
29

30 11c Strategies to improve adherence to intervention protocols, and any  
31 procedures for monitoring adherence (eg, drug tablet return,  
32 laboratory tests) [Page 10](#) , [Randomization and Study schedule](#) ,  
33 [second paragraph](#)  
34  
35

36 11d Relevant concomitant care and interventions that are permitted or  
37 prohibited during the trial [Page 10 and 11](#) , [Randomization and Study](#)  
38 [schedule](#)  
39

40 Outcomes 12 Primary, secondary, and other outcomes, including the specific  
41 measurement variable (eg, systolic blood pressure), analysis metric  
42 (eg, change from baseline, final value, time to event), method of  
43 aggregation (eg, median, proportion), and time point for each  
44 outcome. Explanation of the clinical relevance of chosen efficacy and  
45 harm outcomes is strongly recommended [Page 7](#), [Outcomes](#)  
46 [measures](#)  
47  
48

49 Participant 13 Time schedule of enrolment, interventions (including any run-ins and  
50 timeline washouts), assessments, and visits for participants. A schematic  
51 diagram is highly recommended (see Figure) [Attachment: Table 1.](#)  
52 [MiGDM Study Overview](#) , [and Diagram 1; study overview](#)  
53  
54

55 Sample size 14 Estimated number of participants needed to achieve study objectives  
56 and how it was determined, including clinical and statistical  
57 assumptions supporting any sample size calculations [page 11](#),  
58 [Sample size and Statistical Analysis](#)  
59  
60

1  
2 Recruitment 15 Strategies for achieving adequate participant enrolment to reach  
3 target sample size [Page 9, Study plan](#)  
4

5 **Methods: Assignment of interventions (for controlled trials)**  
6

7 Allocation:

- 8
- 9 Sequence generation 16a Method of generating the allocation sequence (eg, computer-  
10 generated random numbers), and list of any factors for stratification.  
11 To reduce predictability of a random sequence, details of any planned  
12 restriction (eg, blocking) should be provided in a separate document  
13 that is unavailable to those who enrol participants or assign  
14 interventions ) [Page 10 and 11](#) , [Randomization and Study schedule](#)  
15  
16
- 17 Allocation concealment 16b Mechanism of implementing the allocation sequence (eg, central  
18 telephone; sequentially numbered, opaque, sealed envelopes),  
19 describing any steps to conceal the sequence until interventions are  
20 assigned [Page 10 and 11](#) , [Randomization and Study schedule](#)  
21  
22
- 23 Implementation 16c Who will generate the allocation sequence, who will enrol participants,  
24 and who will assign participants to interventions [Page 10 and 11](#) ,  
25 [Randomization and Study schedule](#)  
26
- 27 Blinding (masking) 17a Who will be blinded after assignment to interventions (eg, trial  
28 participants, care providers, outcome assessors, data analysts), and  
29 how [Page 10 and 11](#) , [Randomization and Study schedule](#)  
30  
31
- 32 17b If blinded, circumstances under which unblinding is permissible, and  
33 procedure for revealing a participant's allocated intervention during  
34 the trial [Page 10 and 11](#) , [Randomization and Study schedule](#)  
35

36 **Methods: Data collection, management, and analysis**  
37

- 38 Data collection methods 18a Plans for assessment and collection of outcome, baseline, and other  
39 trial data, including any related processes to promote data quality (eg,  
40 duplicate measurements, training of assessors) and a description of  
41 study instruments (eg, questionnaires, laboratory tests) along with  
42 their reliability and validity, if known. Reference to where data  
43 collection forms can be found, if not in the protocol [Table 1. MiGDM](#)  
44 [Study Overview and data collection sheet](#)  
45  
46
- 47 18b Plans to promote participant retention and complete follow-up,  
48 including list of any outcome data to be collected for participants who  
49 discontinue or deviate from intervention protocols [Page 11 second](#)  
50 [paragraph](#)  
51  
52
- 53 Data management 19 Plans for data entry, coding, security, and storage, including any  
54 related processes to promote data quality (eg, double data entry;  
55 range checks for data values). Reference to where details of data  
56 management procedures can be found, if not in the protocol  
57 [Informed consent ; Confidentially section 16](#)  
58  
59  
60

|    |             |     |                                                                                    |
|----|-------------|-----|------------------------------------------------------------------------------------|
| 1  |             |     |                                                                                    |
| 2  | Statistical | 20a | Statistical methods for analysing primary and secondary outcomes.                  |
| 3  | methods     |     | Reference to where other details of the statistical analysis plan can be           |
| 4  |             |     | found, if not in the protocol <a href="#">page 11, Sample size and Statistical</a> |
| 5  |             |     | <a href="#">Analysis</a>                                                           |
| 6  |             |     |                                                                                    |
| 7  |             | 20b | Methods for any additional analyses (eg, subgroup and adjusted                     |
| 8  |             |     | analyses) <a href="#">page 11, Sample size and Statistical Analysis</a>            |
| 9  |             |     |                                                                                    |
| 10 |             | 20c | Definition of analysis population relating to protocol non-adherence               |
| 11 |             |     | (eg, as randomised analysis), and any statistical methods to handle                |
| 12 |             |     | missing data (eg, multiple imputation) <a href="#">Page 11 , Randomization and</a> |
| 13 |             |     | <a href="#">Study schedule , second paragraph in the page and page 11, Sample</a>  |
| 14 |             |     | <a href="#">size and Statistical Analysis</a>                                      |
| 15 |             |     |                                                                                    |
| 16 |             |     |                                                                                    |

### Methods: Monitoring

|    |                            |     |                                                                                   |
|----|----------------------------|-----|-----------------------------------------------------------------------------------|
| 17 |                            |     |                                                                                   |
| 18 | <b>Methods: Monitoring</b> |     |                                                                                   |
| 19 |                            |     |                                                                                   |
| 20 | Data monitoring            | 21a | Composition of data monitoring committee (DMC); summary of its role               |
| 21 |                            |     | and reporting structure; statement of whether it is independent from              |
| 22 |                            |     | the sponsor and competing interests; and reference to where further               |
| 23 |                            |     | details about its charter can be found, if not in the protocol.                   |
| 24 |                            |     | Alternatively, an explanation of why a DMC is not needed <a href="#">Page 12,</a> |
| 25 |                            |     | <a href="#">Data monitoring</a>                                                   |
| 26 |                            |     |                                                                                   |
| 27 |                            | 21b | Description of any interim analyses and stopping guidelines, including            |
| 28 |                            |     | who will have access to these interim results and make the final                  |
| 29 |                            |     | decision to terminate the trial <a href="#">Page 12, Data monitoring</a>          |
| 30 |                            |     |                                                                                   |
| 31 |                            |     |                                                                                   |
| 32 | Harms                      | 22  | Plans for collecting, assessing, reporting, and managing solicited and            |
| 33 |                            |     | spontaneously reported adverse events and other unintended effects                |
| 34 |                            |     | of trial interventions or trial conduct                                           |
| 35 |                            |     | <a href="#">IRB Research proposal under section Safety reporting:</a>             |
| 36 |                            |     |                                                                                   |
| 37 |                            |     |                                                                                   |
| 38 | Auditing                   | 23  | Frequency and procedures for auditing trial conduct, if any, and                  |
| 39 |                            |     | whether the process will be independent from investigators and the                |
| 40 |                            |     | sponsor <a href="#">IRB Research proposal under section Quality assurance and</a> |
| 41 |                            |     | <a href="#">Reporting</a>                                                         |
| 42 |                            |     |                                                                                   |
| 43 |                            |     |                                                                                   |

### Ethics and dissemination

|    |                   |     |                                                                                      |
|----|-------------------|-----|--------------------------------------------------------------------------------------|
| 44 |                   |     |                                                                                      |
| 45 |                   |     |                                                                                      |
| 46 | Research ethics   | 24  | Plans for seeking research ethics committee/institutional review board               |
| 47 | approval          |     | (REC/IRB) approval <a href="#">Page 13, Ethics approval</a>                          |
| 48 |                   |     |                                                                                      |
| 49 | Protocol          | 25  | Plans for communicating important protocol modifications (eg,                        |
| 50 | amendments        |     | changes to eligibility criteria, outcomes, analyses) to relevant parties             |
| 51 |                   |     | (eg, investigators, REC/IRBs, trial participants, trial registries, journals,        |
| 52 |                   |     | regulators) <a href="#">IRB Research proposal under section Reporting:</a>           |
| 53 |                   |     |                                                                                      |
| 54 |                   |     |                                                                                      |
| 55 | Consent or assent | 26a | Who will obtain informed consent or assent from potential trial                      |
| 56 |                   |     | participants or authorised surrogates, and how (see Item 32) <a href="#">Page 9,</a> |
| 57 |                   |     | <a href="#">Study plan first paragraph</a>                                           |
| 58 |                   |     |                                                                                      |
| 59 |                   |     |                                                                                      |
| 60 |                   |     |                                                                                      |

|    |                               |     |                                                                                                                                                                                                                                                                                                                                                   |
|----|-------------------------------|-----|---------------------------------------------------------------------------------------------------------------------------------------------------------------------------------------------------------------------------------------------------------------------------------------------------------------------------------------------------|
| 1  |                               | 26b | Additional consent provisions for collection and use of participant data and biological specimens in ancillary studies, if applicable<br><a href="#">Consent form section 23,24,25</a>                                                                                                                                                            |
| 2  |                               |     |                                                                                                                                                                                                                                                                                                                                                   |
| 3  |                               |     |                                                                                                                                                                                                                                                                                                                                                   |
| 4  |                               |     |                                                                                                                                                                                                                                                                                                                                                   |
| 5  |                               |     |                                                                                                                                                                                                                                                                                                                                                   |
| 6  | Confidentiality               | 27  | How personal information about potential and enrolled participants will be collected, shared, and maintained in order to protect confidentiality before, during, and after the trial <a href="#">Consent form section 16</a>                                                                                                                      |
| 7  |                               |     |                                                                                                                                                                                                                                                                                                                                                   |
| 8  |                               |     |                                                                                                                                                                                                                                                                                                                                                   |
| 9  |                               |     |                                                                                                                                                                                                                                                                                                                                                   |
| 10 |                               |     |                                                                                                                                                                                                                                                                                                                                                   |
| 11 | Declaration of interests      | 28  | Financial and other competing interests for principal investigators for the overall trial and each study site <a href="#">Page 13 and 14 Declarations and Competing interests</a> :                                                                                                                                                               |
| 12 |                               |     |                                                                                                                                                                                                                                                                                                                                                   |
| 13 |                               |     |                                                                                                                                                                                                                                                                                                                                                   |
| 14 |                               |     |                                                                                                                                                                                                                                                                                                                                                   |
| 15 | Access to data                | 29  | Statement of who will have access to the final trial dataset, and disclosure of contractual agreements that limit such access for investigators <a href="#">Consent form section 16 confidentiality</a>                                                                                                                                           |
| 16 |                               |     |                                                                                                                                                                                                                                                                                                                                                   |
| 17 |                               |     |                                                                                                                                                                                                                                                                                                                                                   |
| 18 |                               |     |                                                                                                                                                                                                                                                                                                                                                   |
| 19 | Ancillary and post-trial care | 30  | Provisions, if any, for ancillary and post-trial care, and for compensation to those who suffer harm from trial participation<br><a href="#">Consent form section 14, 15</a>                                                                                                                                                                      |
| 20 |                               |     |                                                                                                                                                                                                                                                                                                                                                   |
| 21 |                               |     |                                                                                                                                                                                                                                                                                                                                                   |
| 22 |                               |     |                                                                                                                                                                                                                                                                                                                                                   |
| 23 |                               |     |                                                                                                                                                                                                                                                                                                                                                   |
| 24 | Dissemination policy          | 31a | Plans for investigators and sponsor to communicate trial results to participants, healthcare professionals, the public, and other relevant groups (eg, via publication, reporting in results databases, or other data sharing arrangements), including any publication restrictions<br><a href="#">Page 14 Publication and dissemination plan</a> |
| 25 |                               |     |                                                                                                                                                                                                                                                                                                                                                   |
| 26 |                               |     |                                                                                                                                                                                                                                                                                                                                                   |
| 27 |                               |     |                                                                                                                                                                                                                                                                                                                                                   |
| 28 |                               |     |                                                                                                                                                                                                                                                                                                                                                   |
| 29 |                               |     |                                                                                                                                                                                                                                                                                                                                                   |
| 30 |                               |     |                                                                                                                                                                                                                                                                                                                                                   |
| 31 |                               |     |                                                                                                                                                                                                                                                                                                                                                   |
| 32 |                               |     |                                                                                                                                                                                                                                                                                                                                                   |
| 33 |                               |     |                                                                                                                                                                                                                                                                                                                                                   |
| 34 |                               |     |                                                                                                                                                                                                                                                                                                                                                   |
| 35 |                               |     |                                                                                                                                                                                                                                                                                                                                                   |
| 36 |                               | 31b | Authorship eligibility guidelines and any intended use of professional writers <a href="#">Page 14 Authors' contributions</a>                                                                                                                                                                                                                     |
| 37 |                               |     |                                                                                                                                                                                                                                                                                                                                                   |
| 38 |                               |     |                                                                                                                                                                                                                                                                                                                                                   |
| 39 |                               | 31c | Plans, if any, for granting public access to the full protocol, participant-level dataset, and statistical code <a href="#">Not applicable</a>                                                                                                                                                                                                    |
| 40 |                               |     |                                                                                                                                                                                                                                                                                                                                                   |
| 41 |                               |     |                                                                                                                                                                                                                                                                                                                                                   |
| 42 |                               |     |                                                                                                                                                                                                                                                                                                                                                   |
| 43 | <b>Appendices</b>             |     |                                                                                                                                                                                                                                                                                                                                                   |
| 44 | Informed consent materials    | 32  | Model consent form and other related documentation given to participants and authorised surrogates <a href="#">IRB 400 Informed consent form attached</a>                                                                                                                                                                                         |
| 45 |                               |     |                                                                                                                                                                                                                                                                                                                                                   |
| 46 |                               |     |                                                                                                                                                                                                                                                                                                                                                   |
| 47 |                               |     |                                                                                                                                                                                                                                                                                                                                                   |
| 48 |                               |     |                                                                                                                                                                                                                                                                                                                                                   |
| 49 | Biological specimens          | 33  | Plans for collection, laboratory evaluation, and storage of biological specimens for genetic or molecular analysis in the current trial and for future use in ancillary studies, if applicable <a href="#">Relevant information are included in IRB 400 Informed consent form</a>                                                                 |
| 50 |                               |     |                                                                                                                                                                                                                                                                                                                                                   |
| 51 |                               |     |                                                                                                                                                                                                                                                                                                                                                   |
| 52 |                               |     |                                                                                                                                                                                                                                                                                                                                                   |
| 53 |                               |     |                                                                                                                                                                                                                                                                                                                                                   |

---

\*It is strongly recommended that this checklist be read in conjunction with the SPIRIT 2013 Explanation & Elaboration for important clarification on the items. Amendments to the protocol should be tracked and dated. The SPIRIT checklist is copyrighted by the SPIRIT Group under the Creative Commons "[Attribution-NonCommercial-NoDerivs 3.0 Unported](#)" license.
