# Supplementary material for: Effect of antenatal dietary myo-inositol supplementation on the incidence of gestational diabetes mellitus and fetal outcome: protocol for a double-blind randomised controlled trial
Source: PubMed Central journal article supplement — BMJ Open. 2022 Jan 4;12(1):e055314. doi: 10.1136/bmjopen-2021-055314 (PMC8728415; doi:10.1136/bmjopen-2021-055314), 2022-01-04
Supplement: bmjopen-2021-055314supp003.pdf [file bmjopen-2021-055314supp003.pdf]

Subject ID: \_\_\_\_\_

Interview date (dd/mm/yy): --/--/--

**Lifestyle**

- 1- During the **last 7 days**, how many times did you **walk** for at least 10 minutes?
  - a. None
  - b. Once
  - c. Twice
  - d. 3 times
  - e. 4 times
  - f. 5 times
  - g. 6 times
  - h. 7 times and more
  
- 2- How much time did you usually spend **walking** per day?  
\_\_\_\_\_ **hours per day**  
\_\_\_\_\_ **minutes per day**
  
- 3- During the **last 7 days**, on how many times did you do **vigorous** physical activities like aerobics, running, fast bicycling, or fast swimming?
  - a. None
  - b. Once
  - c. Twice
  - d. 3 times
  - e. 4 times
  - f. 5 times
  - g. 6 times
  - h. 7 times and more

- 4- How much time did you usually spend doing **vigorous** physical activities?
- \_\_\_\_\_ **hours per day**
- \_\_\_\_\_ **minutes per day**
- 5- During the **last 7 days**, on how many times did you do **moderate** physical activities like bicycling at a regular pace, swimming at a regular pace, and doubles tennis?
- None
  - Once
  - Twice
  - 3 times
  - 4 times
  - 5 times
  - 6 times
  - 7 times and more
- 6- How much time did you usually spend doing **moderate** physical activities?
- \_\_\_\_\_ **hours per day**
- \_\_\_\_\_ **minutes per day**
- 7- During the **last 7 days**, how much time did you usually spend watching a screen (TV, computer, phone, or other devices)?
- ½ hour or less
  - 1 hour
  - 2 hours
  - 3 hours
  - 4 hours
  - 5 hours
  - more than 5 hours

8- On average, how many hours per day do you spent in sleeping?

- a. 3 hours or less
- b. 4 hours
- c. 5 hours
- d. 6 hours
- e. 7 hours
- f. 8 hours
- g. 9 hours or more
