# Supplementary material for: Effect of antenatal dietary myo-inositol supplementation on the incidence of gestational diabetes mellitus and fetal outcome: protocol for a double-blind randomised controlled trial
Source: PubMed Central journal article supplement — BMJ Open. 2022 Jan 4;12(1):e055314. doi: 10.1136/bmjopen-2021-055314 (PMC8728415; doi:10.1136/bmjopen-2021-055314), 2022-01-04
Supplement: bmjopen-2021-055314supp004.pdf [file bmjopen-2021-055314supp004.pdf]

## FOOD FREQUENCY

Research patient ID

XXX

|                                                                                                                                                                                                            |                                                                                                                                          |                                                                                                                                                              |
|------------------------------------------------------------------------------------------------------------------------------------------------------------------------------------------------------------|------------------------------------------------------------------------------------------------------------------------------------------|--------------------------------------------------------------------------------------------------------------------------------------------------------------|
| Date ___ - ___ -20 ___                                                                                                                                                                                     |                                                                                                                                          |                                                                                                                                                              |
| <input type="radio"/> 1 <sup>st</sup> Trimester <input type="radio"/> 2 <sup>nd</sup> Trimester <input type="radio"/> 3 <sup>rd</sup> Trimester <input type="radio"/> Delivery                             |                                                                                                                                          |                                                                                                                                                              |
| How frequently do you <b>DRINK</b> the following?                                                                                                                                                          |                                                                                                                                          | <b>Frequency and Quantity per day</b>                                                                                                                        |
| Milk products: <ul style="list-style-type: none"> <li>• Full fat cow milk</li> <li>• low fat cow milk</li> <li>• skimmed cow milk</li> <li>• Soya milk</li> <li>• Sweetened milk/condensed milk</li> </ul> | <input type="radio"/> No<br><input type="radio"/> No<br><input type="radio"/> No<br><input type="radio"/> No<br><input type="radio"/> No | Yes, how many Cups/day _____<br>Yes, how many Cups/day _____<br>Yes, how many Cups/day _____<br>Yes, how many Cups/day _____<br>Yes, how many Cups/day _____ |
| Water                                                                                                                                                                                                      | <input type="radio"/> No                                                                                                                 | Yes, how many glasses/day _____                                                                                                                              |
| Tea/coffee                                                                                                                                                                                                 | <input type="radio"/> No                                                                                                                 | Yes, how many Cups/day _____                                                                                                                                 |
| Soft drinks (coca, sprite, fanta)                                                                                                                                                                          | <input type="radio"/> No                                                                                                                 | Yes, how many Cups/day _____                                                                                                                                 |
| Freshly pressed fruit/vegetable juice                                                                                                                                                                      | <input type="radio"/> No                                                                                                                 | Yes, how many Cups/day _____                                                                                                                                 |
| Alcohol                                                                                                                                                                                                    | <input type="radio"/> No                                                                                                                 | Yes, how many glasses/day _____                                                                                                                              |
| How frequently do you <b>EAT</b> the following?                                                                                                                                                            |                                                                                                                                          | <b>Frequency and Quantity per day</b><br>Tablespoon (TBS), Teaspoon (TSP)                                                                                    |
| Bread                                                                                                                                                                                                      | <input type="radio"/> No                                                                                                                 | <input type="radio"/> slice <input type="radio"/> whole bread, how many/day _____                                                                            |
| Cereals                                                                                                                                                                                                    | <input type="radio"/> No                                                                                                                 | <input type="radio"/> Cup <input type="radio"/> TBS <input type="radio"/> TSP, how many/day _____                                                            |
| Rice                                                                                                                                                                                                       | <input type="radio"/> No                                                                                                                 | <input type="radio"/> Cup <input type="radio"/> TBS <input type="radio"/> TSP, how many/day _____                                                            |
| Biscuit, pancake, rusks slice                                                                                                                                                                              | <input type="radio"/> No                                                                                                                 | <input type="radio"/> how many/day _____                                                                                                                     |
| Legumes, beans                                                                                                                                                                                             | <input type="radio"/> No                                                                                                                 | <input type="radio"/> Cup <input type="radio"/> TBS <input type="radio"/> TSP, how many/day _____                                                            |
| Fresh vegetables                                                                                                                                                                                           | <input type="radio"/> No                                                                                                                 | <input type="radio"/> Cup <input type="radio"/> TBS <input type="radio"/> TSP, how many/day _____                                                            |
| Cooked vegetables                                                                                                                                                                                          | <input type="radio"/> No                                                                                                                 | <input type="radio"/> Cup <input type="radio"/> TBS <input type="radio"/> TSP, how many/day _____                                                            |
| Fruits                                                                                                                                                                                                     | <input type="radio"/> No                                                                                                                 | <input type="radio"/> Cup <input type="radio"/> TBS <input type="radio"/> TSP, how many/day _____                                                            |
| Nuts                                                                                                                                                                                                       | <input type="radio"/> No                                                                                                                 | <input type="radio"/> Cup <input type="radio"/> TBS <input type="radio"/> TSP, how many/day _____                                                            |
| Tubers, potatoes, sweet potatoes                                                                                                                                                                           | <input type="radio"/> No                                                                                                                 | <input type="radio"/> Cup <input type="radio"/> TBS <input type="radio"/> TSP, how many/day _____                                                            |
| Noodles, Pasta                                                                                                                                                                                             | <input type="radio"/> No                                                                                                                 | <input type="radio"/> Cup <input type="radio"/> TBS <input type="radio"/> TSP, how many/day _____                                                            |
| Red meat                                                                                                                                                                                                   | <input type="radio"/> No                                                                                                                 | <input type="radio"/> Cup <input type="radio"/> TBS <input type="radio"/> TSP, how many/day _____                                                            |

|                                                                                                                                                               |                          |                                                                                                                                                                                                                                                                                                                                                                                                              |
|---------------------------------------------------------------------------------------------------------------------------------------------------------------|--------------------------|--------------------------------------------------------------------------------------------------------------------------------------------------------------------------------------------------------------------------------------------------------------------------------------------------------------------------------------------------------------------------------------------------------------|
| Poultry                                                                                                                                                       | <input type="radio"/> No | <input type="radio"/> Cup <input type="radio"/> TBS <input type="radio"/> TSP, how many/day_____                                                                                                                                                                                                                                                                                                             |
| Fish, seafood                                                                                                                                                 | <input type="radio"/> No | <input type="radio"/> Cup <input type="radio"/> TBS <input type="radio"/> TSP, how many/day_____                                                                                                                                                                                                                                                                                                             |
| Processed food (roast chicken, turkey, beef sausage)                                                                                                          | <input type="radio"/> No | <input type="radio"/> slice, how many/day _____                                                                                                                                                                                                                                                                                                                                                              |
| Dairy products (cheese, yogurt, leban, labnaa)                                                                                                                | <input type="radio"/> No | <input type="radio"/> Cup <input type="radio"/> TBS <input type="radio"/> TSP, how many/day_____                                                                                                                                                                                                                                                                                                             |
| Eggs                                                                                                                                                          | <input type="radio"/> No | <input type="radio"/> how many/day_____                                                                                                                                                                                                                                                                                                                                                                      |
| Pizza                                                                                                                                                         | <input type="radio"/> No | <input type="radio"/> whole <input type="radio"/> slice, how many/day_____                                                                                                                                                                                                                                                                                                                                   |
| Do you use oil? Which one?<br><ul style="list-style-type: none"> <li>• olive oil</li> <li>• corn oil</li> <li>• sunflower oil</li> <li>• other oil</li> </ul> | <input type="radio"/> No | <input type="radio"/> Cup <input type="radio"/> TBS <input type="radio"/> TSP, how many/day_____<br><input type="radio"/> Cup <input type="radio"/> TBS <input type="radio"/> TSP, how many/day_____<br><input type="radio"/> Cup <input type="radio"/> TBS <input type="radio"/> TSP, how many/day_____<br><input type="radio"/> Cup <input type="radio"/> TBS <input type="radio"/> TSP, how many/day_____ |
| Do you use fats? Which one?<br><ul style="list-style-type: none"> <li>• butter</li> <li>• ghee</li> <li>• lard</li> </ul>                                     | <input type="radio"/> No | <input type="radio"/> Cup <input type="radio"/> TBS <input type="radio"/> TSP, how many/day_____<br><input type="radio"/> Cup <input type="radio"/> TBS <input type="radio"/> TSP, how many/day_____<br><input type="radio"/> Cup <input type="radio"/> TBS <input type="radio"/> TSP, how many/day_____                                                                                                     |
| Do you use salt?                                                                                                                                              | <input type="radio"/> No | <input type="radio"/> Cup <input type="radio"/> TBS <input type="radio"/> TSP, how many/day_____                                                                                                                                                                                                                                                                                                             |
| Do you use sugar?                                                                                                                                             | <input type="radio"/> No | <input type="radio"/> Cup <input type="radio"/> TBS <input type="radio"/> TSP, how many/day_____                                                                                                                                                                                                                                                                                                             |
| How frequently do you <b>have the following habit</b> ?                                                                                                       |                          | <b>Frequency per week</b>                                                                                                                                                                                                                                                                                                                                                                                    |
| Do you eat fast food?                                                                                                                                         | <input type="radio"/> No | Yes, how many times/week _____                                                                                                                                                                                                                                                                                                                                                                               |
| Do you eat fried potatoes (French fries and chips)                                                                                                            | <input type="radio"/> No | Yes, how many times/week _____                                                                                                                                                                                                                                                                                                                                                                               |
| Do you eat chocolate, cookies, cake and donuts                                                                                                                | <input type="radio"/> No | Yes, how many times/week _____                                                                                                                                                                                                                                                                                                                                                                               |
