# Supplementary material for: Effect of antenatal dietary myo-inositol supplementation on the incidence of gestational diabetes mellitus and fetal outcome: protocol for a double-blind randomised controlled trial
Source: PubMed Central journal article supplement — BMJ Open. 2022 Jan 4;12(1):e055314. doi: 10.1136/bmjopen-2021-055314 (PMC8728415; doi:10.1136/bmjopen-2021-055314), 2022-01-04
Supplement: bmjopen-2021-055314supp005.pdf [file bmjopen-2021-055314supp005.pdf]

## 24HDR

|                                          |  |
|------------------------------------------|--|
| <b>Patient ID:</b>                       |  |
| <b>Dates of recorded intake:</b>         |  |
| <b>Nutritionist:</b>                     |  |
| <b>Nutritionist Contact Information:</b> |  |

### Instructions for Keeping Your 24Hrs Food Record

- Please keep your 24hr food record for one day.
- Select day that closely resemble your usual eating habits.
- Each time you eat or drink anything (meals, snacks, etc.) during the day, write down what and how much was served and what and how much was eaten.
- To measure how much was eaten, use a set of **measuring cups and spoons** to help estimate amounts. Also see the examples below to estimate portion sizes.
- Note if food choices are homemade or purchased. Please include brand names whenever possible.

### Amounts and Conversions

1/4 cup = 50 ml or 4 Tablespoons

1/3 cup = 75 ml or 5 1/2 Tablespoons

1/2 cup = 125 ml or 8 Tablespoons

2/3 cup = 150 ml or 10 1/2 Tablespoons

3/4 cup = 175 ml or 12 Tablespoons

1 cup = 250 ml or 16 Tablespoons

1 glass = 200 ml

30 gr = 1 slice of processed cheese or lunchmeat

## How to Estimate Your Portion Size

|                                                                                                   |                                                                                     |
|---------------------------------------------------------------------------------------------------|-------------------------------------------------------------------------------------|
| <b>Meat</b><br>Ninety (90) gr of meat are about the size and thickness of a deck of playing cards |  |
| <b>Fruit</b><br>A medium apple or peach is about the size of a tennis ball                        |  |
| <b>Grains</b><br>One cup of rice or pasta is about the size of your fist                          |  |
| <b>Cheese</b><br>Thirty (30) gr of cheese is about the size of four dice                          |  |

**Three-Day Food Record Checklist**

|                      |                                                                                                                                                 |
|----------------------|-------------------------------------------------------------------------------------------------------------------------------------------------|
| <b>Beverages</b>     | What kind of milk? Homo, 2%, 1%, skim, other.<br>Was it fruit juice or fruit beverage or drink?                                                 |
| <b>Breads</b>        | Did you spread on butter or margarine?                                                                                                          |
| <b>Cereal</b>        | Did you add milk?<br>Did you add sugar or fruit?                                                                                                |
| <b>Dairy</b>         | What brand or kind of yogurt?<br>What brand or kind of cheese?                                                                                  |
| <b>Vegetables</b>    | Was it raw or cooked?<br>Was it fresh, frozen or canned?<br>Did you add any butter, margarine or sauce?                                         |
| <b>Fruit</b>         | Was it a small, medium or large fruit?<br>Was it fresh, frozen or canned?                                                                       |
| <b>Grains</b>        | Did you add any butter, margarine, peanut butter, jam or honey?<br>Was it a half or whole sandwich?<br>Was it a small or large muffin or bagel? |
| <b>Fish</b>          | Was your canned fish packed in water or oil<br>How did you cook your fish?                                                                      |
| <b>Meats</b>         | How did you cook your meat?<br>What kind of cut was it e.g. chicken leg or chicken breast?                                                      |
| <b>Soups</b>         | Was your soup prepared with milk, water or cream?                                                                                               |
| <b>Restaurants</b>   | What restaurant was it?                                                                                                                         |
| <b>Packaged food</b> | What brand was it?                                                                                                                              |

## SAMPLE MENU – 24 HRS

| Day 1: Tuesday, May 14, 2015 |                                  |              |                                          |                                                            |
|------------------------------|----------------------------------|--------------|------------------------------------------|------------------------------------------------------------|
| Time of Meal or Snack        | Type of Food or Beverage Offered | Amount Eaten | Method of Preparation or Brand           | Comments<br>(e.g. amount of food served, too tired to eat) |
| Breakfast                    | Cereal                           | ½ cup        | Honey Nut Cheerios                       |                                                            |
|                              | Milk 2%                          | ½ cup        |                                          | On cereal                                                  |
|                              | Banana                           | ½ med        |                                          |                                                            |
| AM Snack                     | Animal Crackers                  | 10           | Christie                                 |                                                            |
|                              | Apple juice                      | 120 gr       | Allen's pure apple juice-canned          |                                                            |
| Lunch                        | Grilled cheese sandwich          |              |                                          |                                                            |
|                              | Whole wheat bread                | 1 slice      | Dempsters                                | No crusts                                                  |
|                              | Cheese slice                     | 1 slice      | Kraft slices                             |                                                            |
|                              | Butter on bread                  | 1 Tbsp       |                                          |                                                            |
|                              | Yogurt – strawberry              | 75 ml        | Mini-go                                  |                                                            |
|                              | Milk                             | ½ cup        | 2%                                       |                                                            |
| PM Snack                     | Granola bar                      | 1 bar – 35 g | Quaker Chewy, Trail Mix – tropical fruit | Ate half of it                                             |
| Dinner                       | Chicken fingers                  | 1 ½          | President's Choice                       |                                                            |
|                              | French fries                     | 10           | McCain regular                           |                                                            |
|                              | Honey                            | 2 Tbsp       |                                          | For dipping                                                |
|                              | Ketchup                          | 2 Tbsp       | Heinz                                    |                                                            |
|                              | Carrots                          | ½ medium     | Raw, cut in sticks                       |                                                            |
|                              | Milk                             | ½ cup        | 2%                                       |                                                            |
| Evening Snack                | Ice cream                        | 1 cup        | Chocolate Nestle                         |                                                            |

Was this day's intake considered: [ ] Poor [X] Average [ ] Very Good

## 24 HRS

| Date:                 |                                  |              |                                |                                                            |
|-----------------------|----------------------------------|--------------|--------------------------------|------------------------------------------------------------|
| Time of Meal or Snack | Type of Food or Beverage Offered | Amount Eaten | Method of Preparation or Brand | Comments<br>(e.g. amount of food served, too tired to eat) |
| Breakfast             |                                  |              |                                |                                                            |
|                       |                                  |              |                                |                                                            |
|                       |                                  |              |                                |                                                            |
| AM Snack              |                                  |              |                                |                                                            |
| Lunch                 |                                  |              |                                |                                                            |
|                       |                                  |              |                                |                                                            |
|                       |                                  |              |                                |                                                            |
| PM Snack              |                                  |              |                                |                                                            |
| Dinner                |                                  |              |                                |                                                            |
|                       |                                  |              |                                |                                                            |
|                       |                                  |              |                                |                                                            |
| Evening Snack         |                                  |              |                                |                                                            |

Was this day's intake considered: [ ] Poor [ ] Average [ ] Very Good
