# Supplementary material for: Effect of antenatal dietary myo-inositol supplementation on the incidence of gestational diabetes mellitus and fetal outcome: protocol for a double-blind randomised controlled trial
Source: PubMed Central journal article supplement — BMJ Open. 2022 Jan 4;12(1):e055314. doi: 10.1136/bmjopen-2021-055314 (PMC8728415; doi:10.1136/bmjopen-2021-055314), 2022-01-04
Supplement: bmjopen-2021-055314supp006.pdf [file bmjopen-2021-055314supp006.pdf]

**Table 1. MiGDM Study Overview**

| <b>Time point</b>          | 6-16 wks | 20 wks | 24 wks | 28 wks | 32 wks | 36 wks | 37 wks | 38 wks | 39 wks | 40 wks | Delivery |
|----------------------------|----------|--------|--------|--------|--------|--------|--------|--------|--------|--------|----------|
| <b>Measurement</b>         |          |        |        |        |        |        |        |        |        |        |          |
| Demographics               | X        |        |        |        |        |        |        |        |        |        |          |
| Family history             | X        |        |        |        |        |        |        |        |        |        |          |
| Pre-Pregnancy BMI          | X        |        |        |        |        |        |        |        |        |        |          |
| BP and HR                  | X        | X      | XX     | X      | X      | X      | X      | X      | X      | X      | X        |
| Physical activity          | X        |        |        |        |        |        |        |        |        |        |          |
| Maternal outcomes          |          |        |        |        |        |        |        |        |        |        | X        |
| Neonatal outcomes          |          |        |        |        |        |        |        |        |        |        | X        |
| C-peptide<br>Insulin, OGTT |          |        | X      | X      |        |        |        |        |        |        |          |
| Routine clinic tests       | X        |        |        |        |        |        |        |        |        |        |          |
| Ultrasound scan            |          | X      |        | X      | X      | X      |        |        |        |        |          |
