# Supplementary figures and images for: Effect of antenatal dietary myo-inositol supplementation on the incidence of gestational diabetes mellitus and fetal outcome: protocol for a double-blind randomised controlled trial
Source: PubMed Central journal article supplement — BMJ Open. 2022 Jan 4;12(1):e055314. doi: 10.1136/bmjopen-2021-055314 (PMC8728415; doi:10.1136/bmjopen-2021-055314), 2022-01-04

## Diagram 1: A study overview

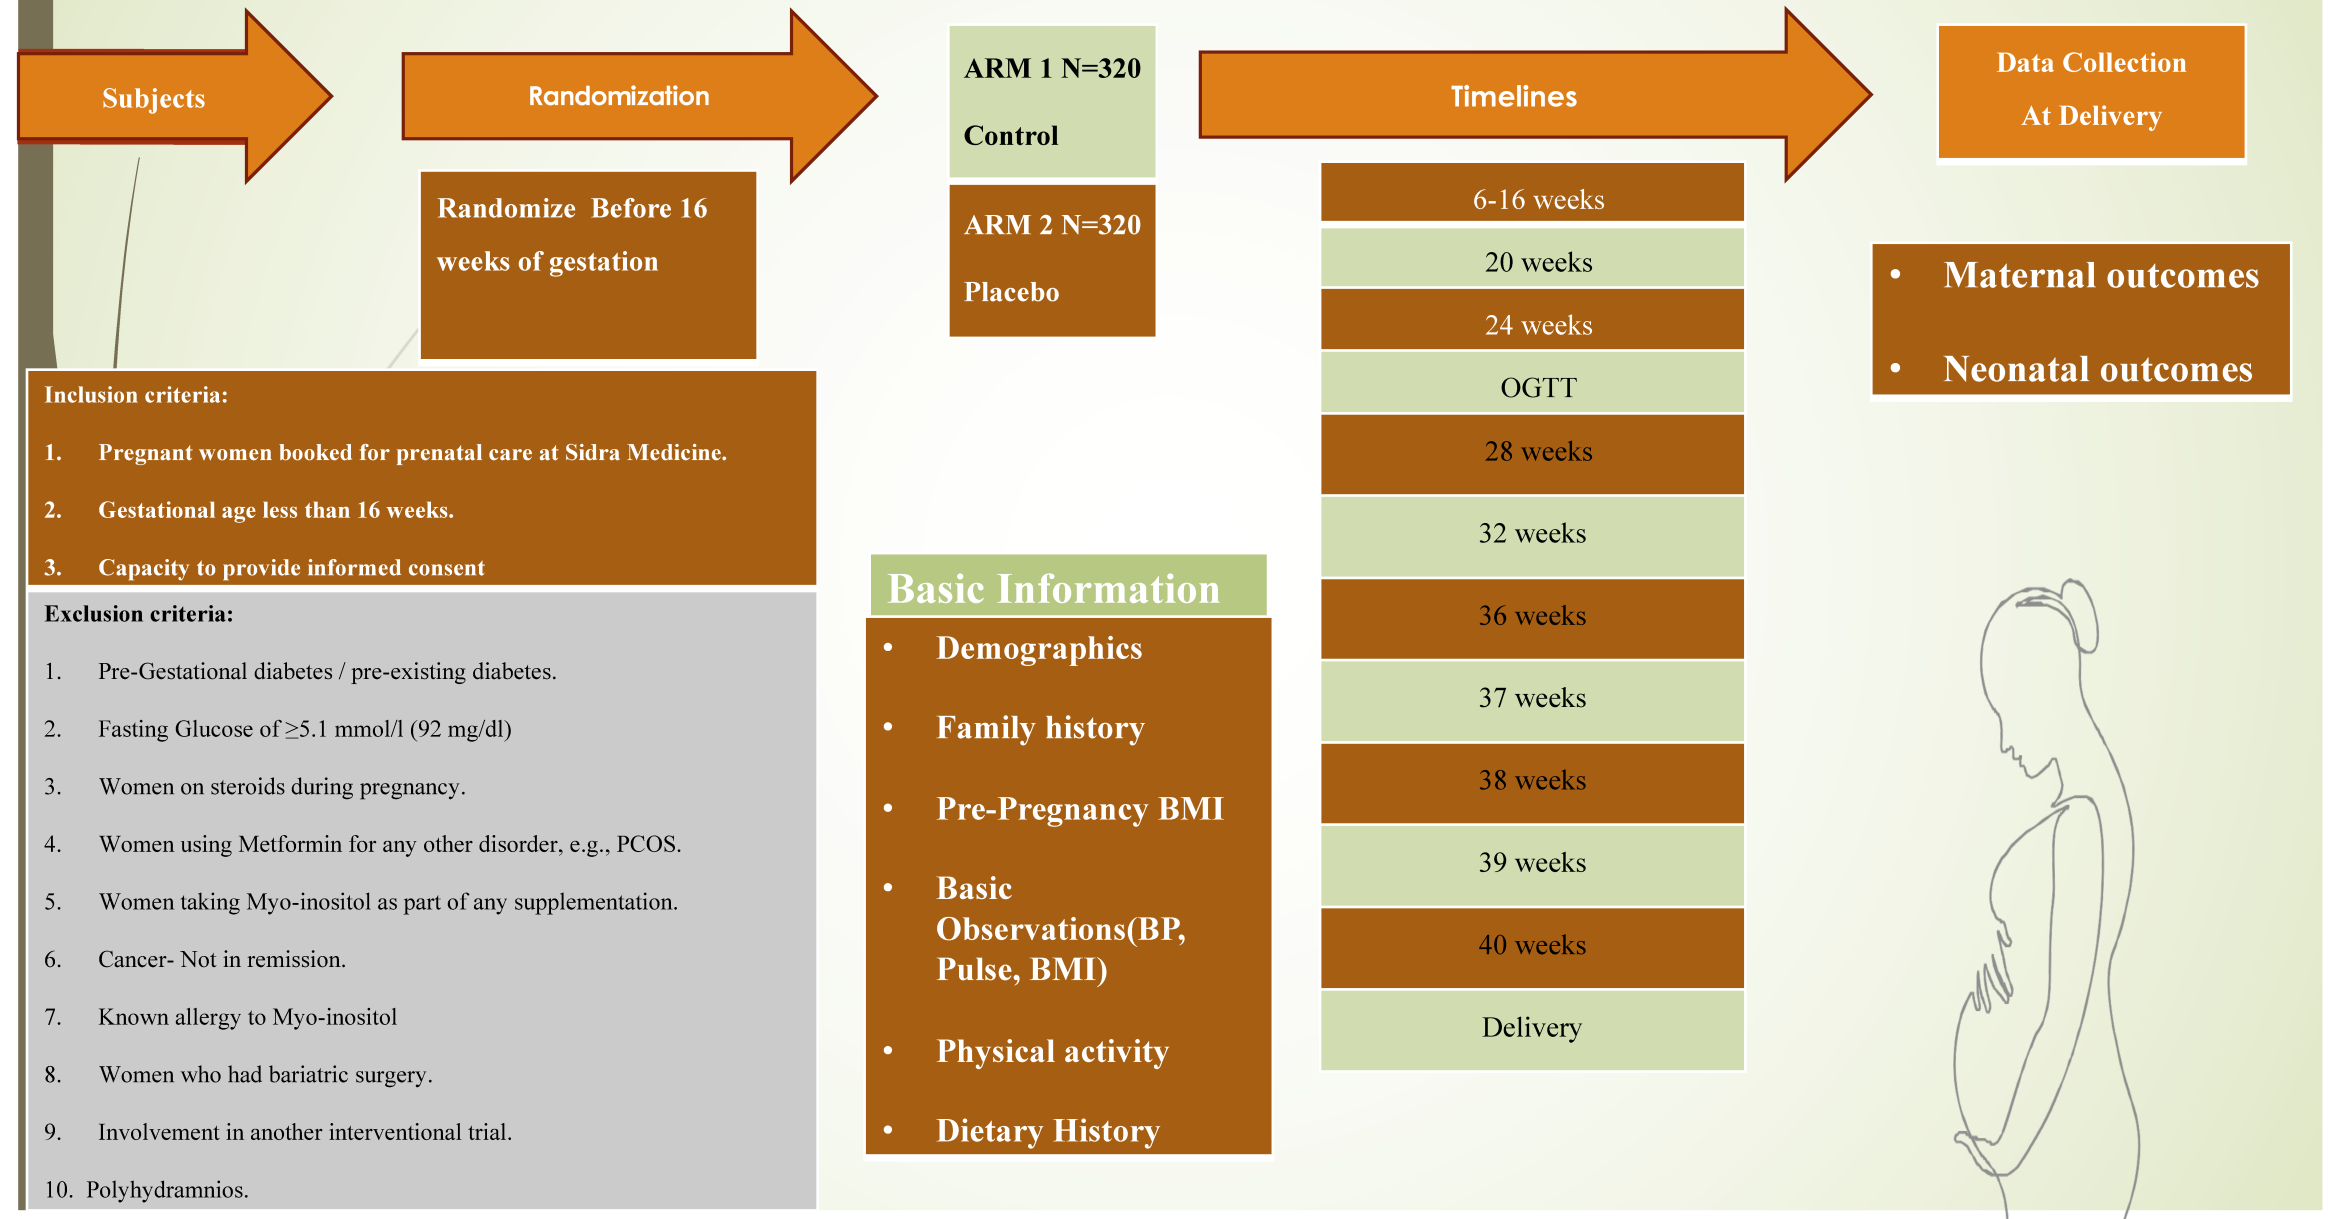

Supplement: bmjopen-2021-055314supp001.pdf [file bmjopen-2021-055314supp001.pdf]
